# Supplementary material for: Regioselective indole C2-alkylation using β-CF3-substituted enones under redox neutral Rh(iii) catalysis
Source: Royal Society of Chemistry journal article supplement (doi:10.1039/c8qo00932e), 2018-01-01

## Supporting Information

# Regioselective Indole C2-Alkylation using $\beta$ -CF<sub>3</sub>-Substituted Enones under Redox Neutral Rh(III) Catalysis

Bharatkumar Chaudhary, Monika Diwaker and Satyasheel Sharma,<sup>\*,a</sup>

<sup>a</sup> Department of Medicinal Chemistry, National Institute of Pharmaceutical Education and Research-Ahmedabad, Gandhinagar, Gujarat, 382355, INDIA

\* Corresponding author. Tel.: +91 79 66745555; fax: +91 79 66745560

E-mail: [sharma.satyasheel@gmail.com](mailto:sharma.satyasheel@gmail.com)

### List of the Contents

|                                                                             |         |
|-----------------------------------------------------------------------------|---------|
| General Information .....                                                   | S2      |
| Synthesis of 1-(Pyrimidin-2-yl)-1 <i>H</i> -indoles (1a-1s) .....           | S2      |
| Synthesis of $\beta$ -CF <sub>3</sub> -Substituted Enones (2a-2p) .....     | S3      |
| Optimization Table for Reaction Conditions .....                            | S4–S6   |
| General Procedure for Cross Coupling and Spectral Data .....                | S7–S20  |
| Typical Procedure for Migratory Product .....                               | S21–S24 |
| Optimization Table and General Procedure for the Synthesis of 5 and 6 ..... | S25–S27 |
| General Procedure for the Synthesis of 7 .....                              | S27     |
| <sup>1</sup> H NMR and <sup>13</sup> C NMR Copies of All Products .....     | S28–S75 |
| HMBC Correlation Spectra of 6a .....                                        | S73     |

**General Information.** All the chemicals were purchased from Sigma-Aldrich. All the reactions were carried out under air using the sealed pressure tubes. NMR was recorded on Bruker (400, 500 MHz) spectrometer with CDCl<sub>3</sub> as reference solvent. Chemical shifts of <sup>1</sup>H and <sup>13</sup>C NMR spectra are reported in parts per million (ppm). Column chromatography was performed on silica gel 230–400 mesh. IR spectra were recorded as KBr pellet on Bruker Alpha FT-IR spectrometer. High-resolution mass spectrometry (HRMS) was done on Agilent Q-TOF LC/MS. Melting points were uncorrected and was taken on Buchi M-560. Pyrimidyl- indoles (**1a-1s**)<sup>1</sup> and β-CF<sub>3</sub>-substituted enones (**2a-2p**)<sup>2,3</sup> were synthesized according to the previous reported procedures.

#### Synthesis of 1-(Pyrimidin-2-yl)-1*H*-indoles (**1a-1s**):<sup>1</sup>

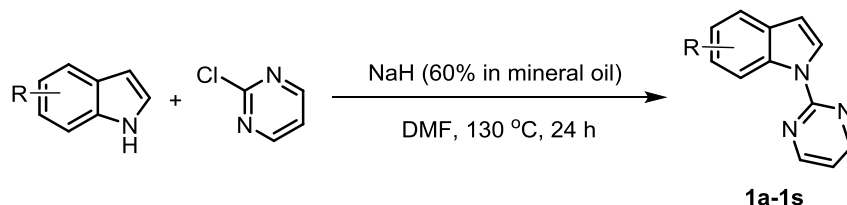

To a stirred solution of indole (10.0 mmol) in DMF (25 mL) at 0 °C, NaH (60% dispersion in mineral oil, 800 mg, 20.0 mmol) was added in portions. After stirring for 30 min at 0 °C, 2-chloropyrimidine (1.72 g, 15.0 mmol) was added and the mixture was stirred at 130 °C for 24 h. Then, the reaction mixture was cooled to ambient temperature, poured into H<sub>2</sub>O (300 mL) and extracted with EtOAc (4×75 mL). The combined organic phase was dried over Na<sub>2</sub>SO<sub>4</sub>. After filtration and evaporation of the solvents under reduced pressure, the crude product was purified by column chromatography on silica gel (eluent; hexane/EtOAc = 4:1) to furnish the product (**1a-1s**) in good yields.

### Synthesis of $\beta$ -CF<sub>3</sub>-Substituted Enones (2a-2p):

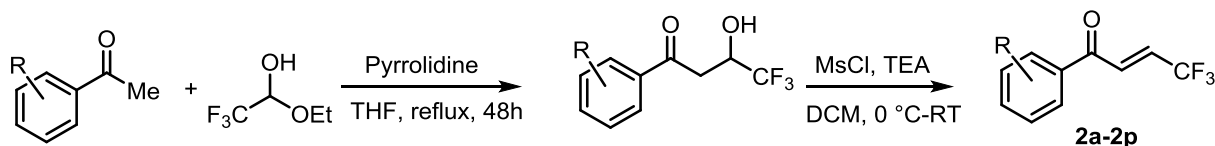

**Step-A**<sup>2</sup>: To a solution of the trifluoroacetaldehyde ethyl hemiacetal (1.44 g, 10.0 mmol) in THF (20 mL), pyrrolidine (0.49 g, 7.0 mmol) was added and the resulting mixture was stirred at room temperature for 30 min. Then corresponding acetophenones (10.0 mmol) was poured into the solution. The reaction mixture was stirred at reflux for 48 h. After cooled to ambient temperature, all the volatiles were removed under reduced pressure. The resulting residue was purification by silica gel column chromatography (eluent; hexane/EtOAc = 10:1) to afford  $\beta$ -hydroxy ketones.

**Step-B**<sup>3</sup>: To a solution of  $\beta$ -hydroxy ketones (5 mmol), in dichloromethane (10 mL) was added methanesulfonyl chloride (0.63 g, 5.5 mmol) and triethylamine (1.11 g, 11 mmol) at 0 °C. After being stirred at r.t. for 3 h, the reaction mixture was quenched with H<sub>2</sub>O, followed by extraction with dichloromethane three times. The combined organic layers were dried over anhydrous Na<sub>2</sub>SO<sub>4</sub>, concentrated in *vacuo*. The residue was purified by silica gel column chromatography (eluent; hexane/EtOAc = 40:1) to afford  $\beta$ -CF<sub>3</sub>-substituted enones (2a-2p).

### Reference:

1. Ackermann, L. and Lygin, A.V., *Org. Lett.*, 2011, **13**, 3332-3335.
2. Jiang, Q., Guo, T., Wu, K. and Yu, Z., *Chem. Commun.*, 2016, **52**, 2913-2915.
3. Morigaki A., Kawamura, M., Arimitsu, S., Ishihara, T. and Konno, T., *Asian. J. Org. Chem.*, 2013, **2**, 239-243.

### Optimization table for reaction conditions:

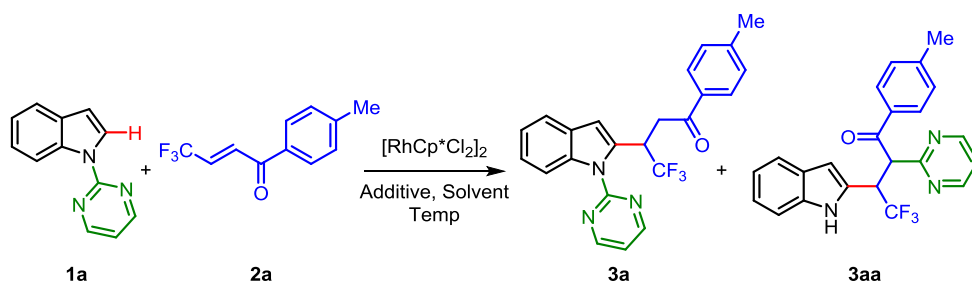

| Entry           | Additives (mol %)                                                        | Solvent     | Yield (%) <sup>b</sup> |           |
|-----------------|--------------------------------------------------------------------------|-------------|------------------------|-----------|
|                 |                                                                          |             | 3a                     | 3aa       |
| 1               | $\text{AgSbF}_6$ (10)                                                    | Toluene     | Trace                  | -         |
| <b>2</b>        | <b><math>\text{AgSbF}_6</math> (10) + <math>\text{AgOAc}</math> (50)</b> | <b>THF</b>  | <b>54</b>              | <b>42</b> |
| 3               | $\text{AgSbF}_6$ (10) + $\text{AgOAc}$ (50)                              | DCE         | 83                     | -         |
| 4               | $\text{AgSbF}_6$ (10) + $\text{AgOAc}$ (50)                              | 1,4-dioxane | 73                     | -         |
| 5               | $\text{AgSbF}_6$ (10) + $\text{AgOAc}$ (50)                              | TFE         | 78                     | Trace     |
| 6               | $\text{AgSbF}_6$ (10) + $\text{AgOAc}$ (50)                              | t-BuOH      | 68                     | Trace     |
| 7               | $\text{AgSbF}_6$ (10) + $\text{AgOAc}$ (50)                              | DMF         | -                      | -         |
| 8               | $\text{AgSbF}_6$ (10) + $\text{AgOPiv}$ (50)                             | THF         | 30                     | 17        |
| 9               | $\text{AgSbF}_6$ (10) + $\text{AgOTf}$ (50)                              | THF         | 42                     | -         |
| 10              | $\text{AgSbF}_6$ (10) + $\text{CsOAc}$ (50)                              | THF         | trace                  | -         |
| 11 <sup>c</sup> | $\text{K}_2\text{CO}_3$ (100)                                            | TFE         | -                      | -         |
| 12 <sup>c</sup> | $\text{Cs}_2\text{CO}_3$ (100)                                           | TFE         | -                      | -         |
| 13              | $\text{AgSbF}_6$ (10) + $\text{NaOAc}$ (100)                             | THF         | trace                  | -         |
| 14              | $\text{AgSbF}_6$ (10) + $\text{KOAc}$ (100)                              | THF         | -                      | -         |
| 15              | $\text{AgSbF}_6$ (10) + $\text{CsOAc}$ (150)                             | THF         | -                      | -         |
| 16              | $\text{AgSbF}_6$ (10) + $\text{AgOAc}$ (50)                              | 1,4-dioxane | 73                     | -         |
| 17              | $\text{AgSbF}_6$ (10) + $\text{AgOAc}$ (50)                              | TFE         | 78                     | -         |
| 18              | $\text{AgSbF}_6$ (10) + $\text{AgOAc}$ (50)                              | DMF         | -                      | -         |



|                 |                                                                             |                   |           |          |
|-----------------|-----------------------------------------------------------------------------|-------------------|-----------|----------|
| 19              | AgSbF <sub>6</sub> (10) + AgOAc (50)                                        | t-BuOH            | 68        | -        |
| 20 <sup>d</sup> | AgSbF <sub>6</sub> (10) + AgOAc (50)                                        | THF               | 44        | 24       |
| 21              | AgOAc (50)                                                                  | THF               | -         | -        |
| 22              | AgOAc (50)                                                                  | TFE               | 73        | Trace    |
| 23              | AgSbF <sub>6</sub> (10) + AgOAc (50) + TfOH (50)                            | THF               | 37        | -        |
| 24              | AgSbF <sub>6</sub> (10) + AgOPiv (50)                                       | THF               | 29        | 17       |
| 25              | AgSbF <sub>6</sub> (10) + AgOTf (50)                                        | THF               | 42        | -        |
| 26              | AgSbF <sub>6</sub> (10) + AgOAc (50) + Ag <sub>2</sub> CO <sub>3</sub> (50) | THF               | 27        | 24       |
| 27              | AgSbF <sub>6</sub> (10) + Ag <sub>2</sub> CO <sub>3</sub> (100)             | THF               | 29        | -        |
| 28              | AgSbF <sub>6</sub> (10) + AgOAc (20) + PhI(OAc) <sub>2</sub><br>(100)       | THF               | 31        | -        |
| 29              | AgSbF <sub>6</sub> (10) + AgOAc (50) + AcOH (100)                           | THF               | 42        | 15       |
| 30              | AgSbF <sub>6</sub> (10) + AgOAc (50) + AdCOOH (100)                         | THF               | 37        | 12       |
| 31              | AgSbF <sub>6</sub> (10) + AgOAc (50) + PivOH (100)                          | THF               | 36        | 12       |
| 32              | AgSbF <sub>6</sub> (10) + AgOAc (50) + K <sub>3</sub> PO <sub>4</sub> (50)  | THF               | -         | -        |
| 33              | AgSbF <sub>6</sub> (10) + AgOAc (50) + Cy <sub>2</sub> NH (50)              | THF               | -         | -        |
| 34              | AgSbF <sub>6</sub> (10) + AgOAc (50)                                        | Et <sub>2</sub> O | -         | -        |
| 35 <sup>e</sup> | AgSbF <sub>6</sub> (4) + AgOAc (50)                                         | THF               | 31        | 12       |
| 36 <sup>f</sup> | AgSbF <sub>6</sub> (20) + AgOAc (50)                                        | THF               | 37        | 26       |
| 37              | AgSbF <sub>6</sub> (20) + AgOAc (50) + K <sub>2</sub> CO <sub>3</sub> (100) | THF               | 29        | -        |
| 38              | AgSbF <sub>6</sub> (20) + K <sub>2</sub> CO <sub>3</sub> (200)              | THF               | 24        | -        |
| 39              | AgSbF <sub>6</sub> (10)                                                     | THF               | 78        | -        |
| <b>40</b>       | <b>AgSbF<sub>6</sub> (10)</b>                                               | <b>DCE</b>        | <b>93</b> | <b>-</b> |
| <b>41</b>       | <b>AgSbF<sub>6</sub> (10)</b>                                               | <b>TFE</b>        | <b>92</b> | <b>-</b> |
| 42              | AgSbF <sub>6</sub> (10)                                                     | 1,4-dioxane       | 88        | -        |

|                       |                                                      |                  |           |   |
|-----------------------|------------------------------------------------------|------------------|-----------|---|
| 43                    | AgSbF <sub>6</sub> (10)                              | t-BuOH           | 85        | - |
| 44                    | AgSbF <sub>6</sub> (10)                              | H <sub>2</sub> O | 50        | - |
| 45                    | -                                                    | DCE              | -         | - |
| 46                    | -                                                    | TFE              | 70        | - |
| <b>47<sup>e</sup></b> | <b>AgSbF<sub>6</sub> (4)</b>                         | <b>DCE</b>       | <b>89</b> | - |
| 48 <sup>d</sup>       | AgSbF <sub>6</sub> (10)                              | DCE              | 42        | - |
| 49                    | AgSbF <sub>6</sub> (10) + Cu(OAc) <sub>2</sub> (100) | THF              | 56        | - |
| 50 <sup>c</sup>       | AgSbF <sub>6</sub> (10) + AcOH (200)                 | THF              | 88        | - |

<sup>a</sup>Reaction conditions: **1a** (0.2 mmol), **2a** (0.2 mmol), [RhCp\*Cl<sub>2</sub>]<sub>2</sub> (2.5 mol %), additives (as mentioned) in solvent (1.0 mL) at 70 °C for 24 h. <sup>b</sup>Isolated yield. <sup>c</sup> Reactions were carried out at 120 °C for 18 h. <sup>d</sup> Reactions were carried out at room temperature for 48 h. <sup>e</sup>[RhCp\*Cl<sub>2</sub>]<sub>2</sub> (1 mol %). <sup>f</sup> [RhCp\*Cl<sub>2</sub>]<sub>2</sub> (5 mol %)

## General procedure for cross coupling and spectral data:

**Typical procedure for the coupling reaction of indoles and (*E*)-4,4,4-trifluoro-1-(aryl)but-2-en-1-one :** To an oven-dried sealed tube with 1-(Pyrimidin-2-yl)-1*H*-indole (**1a**) (39 mg, 0.2 mmol, 100 mol %), (*E*)-4,4,4-Trifluoro-1-(*p*-tolyl)but-2-en-1-one (**2a**) (42.8 mg, 0.2 mmol, 100 mol %), [RhCp\*Cl<sub>2</sub>]<sub>2</sub> (1.2 mg, 0.002 mmol, 1 mol %) and AgSbF<sub>6</sub> (2.7 mg, 0.008 mmol, 4 mol %) was added in DCE (1 mL). The reaction mixture was allowed to stir at 70 °C for 24 h. After cooling at room temperature, the reaction mixture was evaporated and the residue was purified by flash column chromatography (SiO<sub>2</sub>: *n*-hexanes/EtOAc = 9:1) to provide **3a** (73 mg) in 89% yield.

### 4,4,4-Trifluoro-3-(1-(pyrimidin-2-yl)-1*H*-indol-2-yl)-1-(*p*-tolyl)butan-1-one (**3a**):

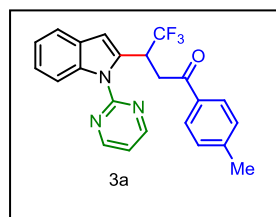

73 mg (89%); white solid; mp = 99.1–100.3 °C; <sup>1</sup>H NMR (400 MHz, CDCl<sub>3</sub>) δ 8.79 (d, *J* = 4.8 Hz, 2H), 8.26 (d, *J* = 8.0 Hz, 1H), 7.84 (d, *J* = 8.0 Hz, 2H), 7.54 (d, *J* = 7.6 Hz, 1H), 7.29–7.22 (m, 3H), 7.20–7.15 (m, 2H), 6.78 (s, 1H), 6.00–5.90 (m, 1H) 3.81 (dd, *J* = 17.6, 8.4 Hz, 1H), 3.65 (dd, *J* = 17.6, 4.8 Hz, 1H), 2.38 (s, 3H); <sup>13</sup>C NMR (100 MHz, CDCl<sub>3</sub>) δ 194.8, 158.3, 158.0, 144.3, 136.9, 134.4, 133.8, 129.3, 128.4, 128.2, 126.7 (q, *J*<sub>C-F</sub> = 279.6 Hz), 123.8, 122.1, 120.4, 117.5, 114.3, 107.3, 39.2, 37.3 (q, *J*<sub>C-F</sub> = 28.1 Hz), 21.6; IR (KBr) ν 3053, 2952, 2912, 1676, 1607, 1569, 1436, 1432, 1332, 1264, 1184, 1157, 1116, 994, 817, 766, 729 cm<sup>-1</sup>; HRMS (Q-TOF, ESI) calcd for C<sub>23</sub>H<sub>19</sub>F<sub>3</sub>N<sub>3</sub>O [M+H]<sup>+</sup> 410.1475, found 410.1479.

### 4,4,4-Trifluoro-1-phenyl-3-(1-(pyrimidin-2-yl)-1*H*-indol-2-yl)butan-1-one (**3b**):

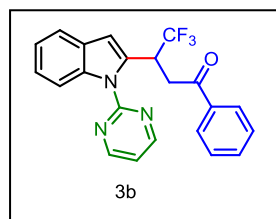

74 mg (94%); white solid; mp = 138.6–139.3 °C; <sup>1</sup>H NMR (400 MHz, CDCl<sub>3</sub>) δ 8.79 (d, *J* = 4.8 Hz, 2H), 8.27 (d, *J* = 8.4 Hz, 1H), 7.94 (d, *J* = 7.2 Hz, 2H), 7.56 (t, *J* = 7.6 Hz, 2H), 7.44 (t, *J* = 8.0 Hz, 2H), 7.28 (td, *J* = 8.4, 1.2 Hz, 1H), 7.21–7.16 (m, 2H), 6.79 (s, 1H), 6.00–5.90 (m, 1H), 3.83 (dd, *J* = 17.6, 8.0 Hz, 1H), 3.68 (dd, *J* = 18.0, 5.2 Hz, 1H); <sup>13</sup>C NMR (100 MHz, CDCl<sub>3</sub>) δ 195.2, 158.3, 158.0, 136.9, 136.3, 134.3, 133.4, 128.7, 128.4, 128.1, 126.7 (q, *J*<sub>C-F</sub> = 278.4 Hz), 123.8, 122.1, 120.4, 117.6, 114.3, 107.3, 39.4, 37.3 (q, *J*<sub>C-F</sub> = 28.2 Hz); IR (KBr) ν 3048, 2925, 1689, 1566, 1456, 1424, 1350, 1317, 1262, 1218, 1161, 1104, 997, 820, 748

cm<sup>-1</sup>; HRMS (Q-TOF, ESI) calcd for C<sub>22</sub>H<sub>17</sub>F<sub>3</sub>N<sub>3</sub>O [M+H]<sup>+</sup> 396.1318, found 396.1321.

**4,4,4-Trifluoro-1-(4-methoxyphenyl)-3-(1-(pyrimidin-2-yl)-1H-indol-2-yl)butan-1-one (3c):**

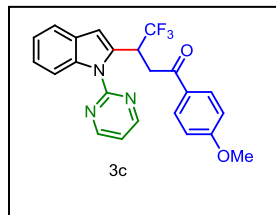

78 mg (92%); Off white solid; mp = 102.1–103.2 °C; <sup>1</sup>H NMR (400 MHz, CDCl<sub>3</sub>) δ 8.80 (d, *J* = 4.8 Hz, 2H), 8.26 (d, *J* = 8.4 Hz, 1H), 7.92 (dt, *J* = 9.2, 2.8 Hz, 2H), 7.54 (d, *J* = 7.6 Hz, 1H), 7.27 (td, *J* = 7.2, 1.2 Hz, 1H), 7.20–7.15 (m, 2H), 6.90 (d, *J* = 9.2 Hz, 2H) 6.78 (s, 1H), 6.00–5.91 (m, 1H), 3.83 (s, 3H) 3.78 (dd, *J* = 17.6, 8.8 Hz, 1H), 3.62 (dd, *J* = 17.6, 4.8 Hz, 1H); <sup>13</sup>C NMR (100 MHz, CDCl<sub>3</sub>) δ 193.7, 163.7, 158.3, 158.1, 137.0, 134.5, 130.4, 129.4, 128.4, 126.8 (q, *J*<sub>C-F</sub> = 278.1 Hz), 123.7, 122.1, 120.4, 117.5, 114.3, 113.8, 107.2, 55.5, 38.9, 37.4 (q, *J*<sub>C-F</sub> = 28.0 Hz); IR (KBr) ν 3049, 2991, 2933, 1676, 1601, 1569, 1513, 1455, 1424, 1322, 1259, 1100, 1026, 992, 810, 744 cm<sup>-1</sup>; HRMS (Q-TOF, ESI) calcd for C<sub>23</sub>H<sub>19</sub>F<sub>3</sub>N<sub>3</sub>O<sub>2</sub> [M+H]<sup>+</sup> 426.1424, found 426.1430.

**1-(4-Chlorophenyl)-4,4,4-trifluoro-3-(1-(pyrimidin-2-yl)-1H-indol-2-yl)butan-1-one (3d):**

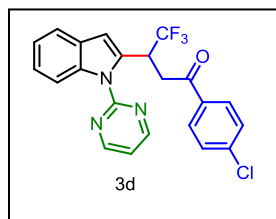

76 mg (88%); white solid; mp = 99.5–100.1 °C; <sup>1</sup>H NMR (400 MHz, CDCl<sub>3</sub>) δ 8.79 (d, *J* = 4.4 Hz, 2H), 8.26 (d, *J* = 8.4 Hz, 1H), 7.86 (d, *J* = 8.4 Hz, 2H), 7.55 (d, *J* = 7.6 Hz, 1H), 7.41 (d, *J* = 8.4 Hz, 2H), 7.28 (t, *J* = 8.0 Hz, 1H), 7.21–7.17 (m, 2H), 6.78 (s, 1H), 5.97–5.87 (m, 1H) 3.79 (dd, *J* = 17.6, 8.4 Hz, 1H), 3.64 (dd, *J* = 17.6, 4.8 Hz, 1H); <sup>13</sup>C NMR (100 MHz, CDCl<sub>3</sub>) δ 194.1, 158.3, 158.0, 140.0, 136.9, 134.6, 134.1, 129.5, 129.0, 128.3, 126.6 (q, *J*<sub>C-F</sub> = 278.3 Hz), 123.9, 122.2, 120.4, 117.6, 114.3, 107.3, 39.4, 37.3 (q, *J*<sub>C-F</sub> = 28.2 Hz); IR (KBr) ν 3045, 2958, 2926, 1692, 1590, 1569, 1456, 1436, 1352, 1263, 1228, 1144, 1102, 979, 812, 749 cm<sup>-1</sup>; HRMS (Q-TOF, ESI) calcd for C<sub>22</sub>H<sub>16</sub>ClF<sub>3</sub>N<sub>3</sub>O [M+H]<sup>+</sup> 430.0929, found 430.0933.

**1-(4-Bromophenyl)-4,4,4-trifluoro-3-(1-(pyrimidin-2-yl)-1H-indol-2-yl)butan-1-one (3e):**

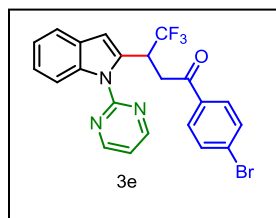

88 mg (93%); off white solid; mp = 95.7–96.3 °C; <sup>1</sup>H NMR (400 MHz, CDCl<sub>3</sub>) δ 8.79 (d, *J* = 4.4 Hz, 2H), 8.26 (d, *J* = 8.4 Hz, 1H), 7.79 (d, *J* = 8.0 Hz, 2H), 7.59–7.54 (m, 3H), 7.28 (t, *J* = 7.2 Hz, 1H), 7.21–7.17 (m, 2H), 6.78 (s, 1H), 5.95–5.89 (m, 1H), 3.78 (dd, *J* = 17.6, 8.0 Hz, 1H), 3.65 (dd, *J* = 17.6, 4.4 Hz, 1H); <sup>13</sup>C NMR (100 MHz, CDCl<sub>3</sub>) δ 194.3, 158.3,

158.0, 136.9, 135.0, 134.1, 132.0, 129.6, 128.7, 128.3, 126.6 (q,  $J_{C-F} = 278.3$  Hz), 123.9, 122.2, 120.4, 117.6, 114.3, 107.3, 39.4, 37.3 (q,  $J_{C-F} = 28.2$  Hz); IR (KBr)  $\nu$  3054, 2955, 2923, 1692, 1582, 1455, 1433, 1351, 1317, 1264, 1222, 1146, 1101, 1069, 1010, 975, 809, 748  $\text{cm}^{-1}$ ; HRMS (Q-TOF, ESI) calcd for  $\text{C}_{22}\text{H}_{16}\text{BrF}_3\text{N}_3\text{O}$   $[\text{M}+\text{H}]^+$  474.0424, found 474.0429.

**4,4,4-Trifluoro-1-(4-fluorophenyl)-3-(1-(pyrimidin-2-yl)-1H-indol-2-yl)butan-1-one (3f):**

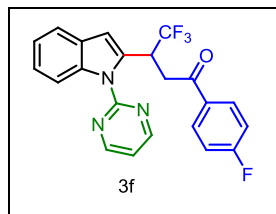

79 mg (96%); white solid; mp = 80.6–81.4 °C;  $^1\text{H}$  NMR (400 MHz,  $\text{CDCl}_3$ )  $\delta$  8.79 (d,  $J = 4.4$  Hz, 2H), 8.26 (d,  $J = 8.4$  Hz, 1H), 7.97–7.94 (m, 2H), 7.55 (d,  $J = 7.6$  Hz, 1H), 7.28 (t,  $J = 7.6$  Hz, 1H), 7.21–7.16 (m, 2H), 7.10 (t,  $J = 8.4$  Hz, 2H), 6.78 (s, 1H), 5.99–5.89 (m, 1H), 3.79 (dd,  $J = 17.6, 8.4$  Hz, 1H), 3.64 (dd,  $J = 17.6, 4.4$  Hz, 1H);  $^{13}\text{C}$  NMR (100 MHz,  $\text{CDCl}_3$ )  $\delta$  193.7, 165.9 (d,  $J_{C-F} = 254.1$  Hz), 158.3, 158.0, 136.9, 134.2, 132.7 (d,  $J_{C-F} = 2.8$  Hz), 130.1 (d,  $J_{C-F} = 9.3$  Hz), 128.3, 126.6 (q,  $J_{C-F} = 278.2$  Hz), 123.9, 122.2, 120.4, 117.6, 115.8 (d,  $J_{C-F} = 21.8$  Hz), 114.3, 107.3, 39.3, 37.3 (q,  $J_{C-F} = 28.1$  Hz); IR (KBr)  $\nu$  3069, 2955, 2927, 1691, 1595, 1507, 1457, 1434, 1351, 1318, 1266, 1229, 1162, 1099, 981, 847, 818, 748  $\text{cm}^{-1}$ ; HRMS (Q-TOF, ESI) calcd for  $\text{C}_{22}\text{H}_{16}\text{F}_4\text{N}_3\text{O}$   $[\text{M}+\text{H}]^+$  414.1224, found 414.1226.

**4,4,4-Trifluoro-3-(1-(pyrimidin-2-yl)-1H-indol-2-yl)-1-(4-(trifluoromethyl)phenyl)butan-1-one (3g):**

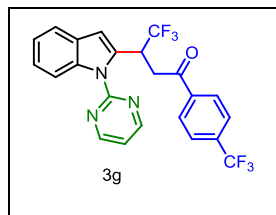

88 mg (95%); white solid; mp = 113.4–113.8 °C;  $^1\text{H}$  NMR (400 MHz,  $\text{CDCl}_3$ )  $\delta$  8.79 (d,  $J = 4.4$  Hz, 2H), 8.27 (d,  $J = 8.4$  Hz, 1H), 8.02 (d,  $J = 8.0$  Hz, 2H), 7.71 (d,  $J = 8.4$  Hz, 2H), 7.55 (d,  $J = 8.0$  Hz, 1H), 7.29 (t,  $J = 7.2$  Hz, 1H), 7.22–7.18 (m, 2H), 6.79 (s, 1H), 5.98–5.88 (m, 1H), 3.83 (dd,  $J = 18.0, 8.4$  Hz, 1H), 3.70 (dd,  $J = 17.6, 4.8$  Hz, 1H);  $^{13}\text{C}$  NMR (100 MHz,  $\text{CDCl}_3$ )  $\delta$  194.5, 158.3, 158.0, 138.8, 136.9, 134.7 (q,  $J_{C-F} = 32.7$  Hz), 133.9, 128.4, 128.3, 126.6 (q,  $J_{C-F} = 278.2$  Hz), 125.8 (q,  $J_{C-F} = 3.6$  Hz), 124.0, 123.5 (q,  $J_{C-F} = 271.2$  Hz), 122.3, 120.5, 117.6, 114.3, 107.4, 39.8, 37.3 (q,  $J_{C-F} = 28.4$  Hz); IR (KBr)  $\nu$  3051, 2948, 2926, 1698, 1569, 1455, 1424, 1319, 1263, 1216, 1164, 1135, 1104, 1070, 997, 823, 740  $\text{cm}^{-1}$ ; HRMS (Q-TOF, ESI) calcd for  $\text{C}_{23}\text{H}_{16}\text{F}_6\text{N}_3\text{O}$   $[\text{M}+\text{H}]^+$  464.1192, found 464.1195.

**4,4,4-Trifluoro-1-(2-fluorophenyl)-3-(1-(pyrimidin-2-yl)-1H-indol-2-yl)butan-1-one (3h):**

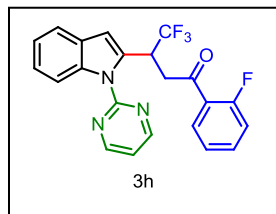

79 mg (96%); white solid; mp = 100.8–101.2 °C;  $^1\text{H}$  NMR (400 MHz,  $\text{CDCl}_3$ )  $\delta$  8.80 (d,  $J$  = 4.8 Hz, 2H), 8.27 (d,  $J$  = 8.4 Hz, 1H), 7.77 (td,  $J$  = 7.6, 1.6 Hz, 1H), 7.55 (d,  $J$  = 8.0 Hz, 1H), 7.53–7.47 (m, 1H), 7.29 (ddd,  $J$  = 8.4, 6.8, 1.2 Hz, 1H), 7.21–7.11 (m, 4H), 6.80 (s, 1H), 6.02–5.92 (m, 1H), 3.82 (ddd,  $J$  = 18.8, 8.4, 2.8 Hz, 1H), 3.72 (ddd,  $J$  = 18.4, 4.8, 2.8 Hz, 1H);  $^{13}\text{C}$  NMR (100 MHz,  $\text{CDCl}_3$ )  $\delta$  193.6, 162.0 (d,  $J_{\text{C-F}}$  = 252.8 Hz), 158.3, 158.1, 136.9, 135.0 (d,  $J_{\text{C-F}}$  = 9.1 Hz), 134.2, 130.8, 128.4, 126.6 (q,  $J_{\text{C-F}}$  = 278.4 Hz), 124.9 (d,  $J_{\text{C-F}}$  = 12.5 Hz), 124.6, 123.8, 122.1, 120.5, 117.5, 116.7 (d,  $J_{\text{C-F}}$  = 23.6 Hz), 114.3, 107.5, 44.1 (d,  $J_{\text{C-F}}$  = 9.6 Hz), 37.1 (q,  $J_{\text{C-F}}$  = 28.3 Hz); IR (KBr)  $\nu$  3050, 2933, 1688, 1609, 1566, 1456, 1423, 1350, 1316, 1265, 1214, 1162, 1104, 993, 819, 749  $\text{cm}^{-1}$ ; HRMS (Q-TOF, ESI) calcd for  $\text{C}_{22}\text{H}_{16}\text{F}_4\text{N}_3\text{O}$   $[\text{M}+\text{H}]^+$  414.1224, found 414.1230.

**1-(2-Chlorophenyl)-4,4,4-trifluoro-3-(1-(pyrimidin-2-yl)-1H-indol-2-yl)butan-1-one (3i):**

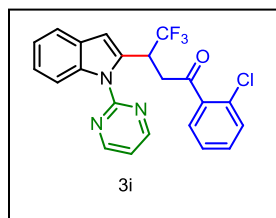

81 mg (94%); off white solid; mp = 71.2–72.0 °C;  $^1\text{H}$  NMR (400 MHz,  $\text{CDCl}_3$ )  $\delta$  8.79 (d,  $J$  = 4.8 Hz, 2H), 8.27 (d,  $J$  = 8.4 Hz, 1H), 7.57 (d,  $J$  = 7.6 Hz, 1H), 7.40–7.32 (m, 3H), 7.29 (td,  $J$  = 8.4, 1.2 Hz, 1H), 7.25–7.21 (m, 2H), 7.18 (t,  $J$  = 4.8 Hz, 1H), 6.79 (s, 1H), 5.96–5.86 (m, 1H), 3.75 (d,  $J$  = 6.8 Hz, 2H);  $^{13}\text{C}$  NMR (100 MHz,  $\text{CDCl}_3$ )  $\delta$  198.5, 158.3, 157.9, 138.5, 136.9, 133.7, 132.1, 130.9, 130.5, 129.3, 128.4, 127.0, 126.4 (q,  $J_{\text{C-F}}$  = 278.6 Hz), 123.9, 122.2, 120.5, 117.6, 114.3, 107.9, 43.5, 37.5 (q,  $J_{\text{C-F}}$  = 28.3 Hz); IR (KBr)  $\nu$  3045, 2937, 1699, 1565, 1423, 1349, 1311, 1241, 1212, 1162, 1106, 1034, 987, 817, 759, 674, 636  $\text{cm}^{-1}$ ; HRMS (Q-TOF, ESI) calcd for  $\text{C}_{22}\text{H}_{16}\text{ClF}_3\text{N}_3\text{O}$   $[\text{M}+\text{H}]^+$  430.0929, found 430.0935.

**4,4,4-Trifluoro-3-(1-(pyrimidin-2-yl)-1H-indol-2-yl)-1-(*o*-tolyl)butan-1-one (3j):**

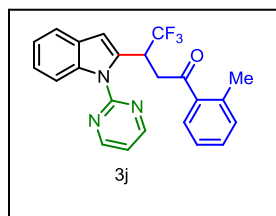

78 mg (95%); sticky solid;  $^1\text{H}$  NMR (400 MHz,  $\text{CDCl}_3$ )  $\delta$  8.78 (d,  $J$  = 4.8 Hz, 2H), 8.27 (d,  $J$  = 8.4 Hz, 1H), 7.64 (d,  $J$  = 7.6 Hz, 1H), 7.56 (d,  $J$  = 8.0 Hz, 1H), 7.35 (td,  $J$  = 7.2, 1.2 Hz, 1H), 7.31–7.26 (m, 1H), 7.25–7.18 (m, 3H), 7.16 (t,  $J$  = 4.8 Hz, 1H), 6.79 (s, 1H), 5.96–5.86 (m, 1H), 3.71 (dd,  $J$  = 17.6, 7.6 Hz, 1H), 3.63 (dd,  $J$  = 17.6, 6.0 Hz, 1H), 2.33 (s, 3H);  $^{13}\text{C}$  NMR (100 MHz,  $\text{CDCl}_3$ )  $\delta$  199.1, 158.3, 158.0, 138.4, 137.2, 136.9, 134.1, 133.0, 131.6,

128.4, 128.2, 126.6 (q,  $J_{C-F} = 278.4$  Hz), 125.7, 123.9, 122.1, 120.5, 117.5, 114.2, 107.6, 42.0, 37.5 (q,  $J_{C-F} = 28.2$  Hz), 21.0; IR (KBr)  $\nu$  3049, 2967, 2926, 2854, 1691, 1569, 1454, 1426, 1347, 1315, 1259, 1153, 1104, 984, 808, 749  $\text{cm}^{-1}$ ; HRMS (Q-TOF, ESI) calcd for  $\text{C}_{23}\text{H}_{19}\text{F}_3\text{N}_3\text{O}$   $[\text{M}+\text{H}]^+$  410.1475, found 410.1494.

**4,4,4-Trifluoro-1-(2-methoxyphenyl)-3-(1-(pyrimidin-2-yl)-1H-indol-2-yl)butan-1-one (3k):**

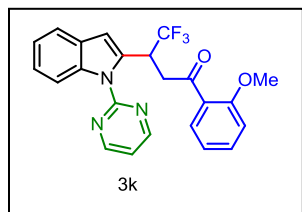

81 mg (91%); light orange sticky solid;  $^1\text{H}$  NMR (400 MHz,  $\text{CDCl}_3$ )  $\delta$  8.77 (d,  $J = 4.8$  Hz, 2H), 8.25 (d,  $J = 8.0$  Hz, 1H), 7.61 (dd,  $J = 7.6, 1.6$  Hz, 1H), 7.55 (d,  $J = 7.6$  Hz, 1H), 7.45–7.41 (m, 1H), 7.29–7.25 (m, 1H), 7.20–7.16 (m, 1H), 7.14 (t,  $J = 4.8$  Hz, 1H), 6.95–6.91 (m, 2H), 6.78 (s, 1H), 5.99–5.89 (m, 1H), 3.90 (s, 3H), 3.80 (dd,  $J = 18.0, 8.4$  Hz, 1H), 3.73 (dd,  $J = 18.0, 5.6$  Hz, 1H);  $^{13}\text{C}$  NMR (100 MHz,  $\text{CDCl}_3$ )  $\delta$  197.2, 158.6, 158.2, 158.1, 137.0, 134.6, 133.9, 130.7, 128.4, 127.2, 126.7 (q,  $J_{C-F} = 278.3$  Hz), 123.7, 122.0, 120.7, 120.4, 117.5, 114.2, 111.4, 107.5, 55.5, 44.2, 37.4 (q,  $J_{C-F} = 27.7$  Hz); IR (KBr)  $\nu$  3321, 3082, 2922, 1647, 1582, 1509, 1488, 1386, 1302, 1195, 1065, 894, 880, 829, 791, 702  $\text{cm}^{-1}$ ; HRMS (Q-TOF, ESI) calcd for  $\text{C}_{23}\text{H}_{19}\text{F}_3\text{N}_3\text{O}_2$   $[\text{M}+\text{H}]^+$  426.1424, found 426.1430.

**1-(2,4-Dichlorophenyl)-4,4,4-trifluoro-3-(1-(pyrimidin-2-yl)-1H-indol-2-yl)butan-1-one (3l):**

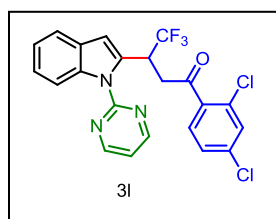

88 mg (95%); transparent sticky solid;  $^1\text{H}$  NMR (400 MHz,  $\text{CDCl}_3$ )  $\delta$  8.79 (d,  $J = 4.8$  Hz, 2H), 8.28 (d,  $J = 8.4$  Hz, 1H), 7.56 (d,  $J = 7.6$  Hz, 1H), 7.39 (s, 1H), 7.31–7.25 (m, 2H), 7.23–7.18 (m, 3H), 6.78 (s, 1H), 5.93–5.83 (m, 1H) 3.71 (d,  $J = 6.8$  Hz, 2H);  $^{13}\text{C}$  NMR (100 MHz,  $\text{CDCl}_3$ )  $\delta$  197.3, 158.3, 157.9, 137.8, 136.9, 136.6, 133.4, 132.0, 130.6, 130.3, 128.3, 127.5, 126.3 (q,  $J_{C-F} = 278.5$  Hz), 124.0, 122.3, 120.5, 117.6, 114.4, 108.0, 43.5, 37.6 (q,  $J_{C-F} = 28.5$  Hz); IR (KBr)  $\nu$  3048, 1703, 1579, 1454, 1427, 1347, 1316, 1260, 1156, 1107, 988, 956, 812  $\text{cm}^{-1}$ ; HRMS (Q-TOF, ESI) calcd for  $\text{C}_{22}\text{H}_{15}\text{Cl}_2\text{F}_3\text{N}_3\text{O}$   $[\text{M}+\text{H}]^+$  464.0539, found 464.0544.

**4,4,4-Trifluoro-1-(3-methoxyphenyl)-3-(1-(pyrimidin-2-yl)-1H-indol-2-yl)butan-1-one (3m):**

81 mg (95%); Light yellow sticky solid;  $^1\text{H}$  NMR (400 MHz,  $\text{CDCl}_3$ )  $\delta$  8.00 (d,  $J = 4.8$  Hz, 2H), 8.27 (d,  $J = 8.4$  Hz, 1H), 7.55 (d,  $J = 7.6$  Hz, 2H), 7.44 (t,  $J = 2.0$  Hz, 1H), 7.36 (d,  $J = 8.0$  Hz, 1H),

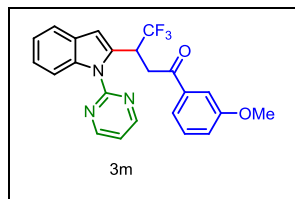

7.30–7.26 (m, 1H), 7.21–7.16 (m, 2H), 7.18 (dd,  $J = 8.0, 2.0$  Hz, 1H), 6.79 (s, 1H), 6.00–5.90 (m, 1H), 3.83 (dd,  $J = 17.6, 8.4$  Hz, 1H), 3.80 (s, 3H), 3.67 (dd,  $J = 18.0, 4.8$  Hz, 1H);  $^{13}\text{C}$  NMR (100 MHz,  $\text{CDCl}_3$ )  $\delta$  195.1, 159.8, 158.3, 158.0, 137.6, 136.9, 134.3, 132.1, 129.7, 128.4, 126.7 (q,  $J_{\text{C-F}} = 278.1$  Hz), 123.8, 122.5, 120.7, 120.1, 117.5, 114.3, 112.2, 107.3, 55.4, 39.5, 37.4 (q,  $J_{\text{C-F}} = 28.2$  Hz); IR (KBr)  $\nu$  3051, 2837, 1687, 1571, 1427, 1347, 1317, 1259, 1156, 1107, 1041, 747  $\text{cm}^{-1}$ ; HRMS (Q-TOF, ESI) calcd for  $\text{C}_{23}\text{H}_{19}\text{F}_3\text{N}_3\text{O}_2$   $[\text{M}+\text{H}]^+$  426.1424, found 426.1436.

**1-(3-Chlorophenyl)-4,4,4-trifluoro-3-(1-pyrimidin-2-yl)-1H-indol-2-yl)butan-1-one (3n):**

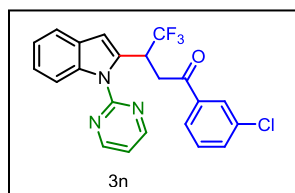

80 mg (93%); white solid; mp = 97.6–98.2  $^\circ\text{C}$ ;  $^1\text{H}$  NMR (400 MHz,  $\text{CDCl}_3$ )  $\delta$  8.79 (d,  $J = 4.8$  Hz, 2H), 8.27 (d,  $J = 8.4$  Hz, 1H), 7.90 (t,  $J = 2.0$  Hz, 1H), 7.80 (dt,  $J = 8.0, 1.2$  Hz, 1H), 7.56 (d,  $J = 7.2$  Hz, 1H), 7.54–7.51 (m, 1H), 7.38 (t,  $J = 8.0$  Hz, 1H), 7.30–7.26 (m, 1H), 7.22–7.17 (m, 2H), 6.79 (s, 1H), 5.96–5.87 (m, 1H), 3.80 (dd,  $J = 18.0, 8.4$  Hz, 1H), 3.65 (dd,  $J = 17.6, 4.8$  Hz, 1H);  $^{13}\text{C}$  NMR (100 MHz,  $\text{CDCl}_3$ )  $\delta$  194.1, 158.3, 158.0, 137.7, 136.9, 135.0, 134.0, 133.4, 130.0, 128.3, 128.2, 126.6 (q,  $J_{\text{C-F}} = 278.4$  Hz), 126.2, 123.9, 122.2, 120.5, 117.6, 114.3, 107.3, 39.6, 37.3 (q,  $J_{\text{C-F}} = 28.3$  Hz); IR (KBr)  $\nu$  3045, 2923, 1692, 1568, 1455, 1424, 1349, 1318, 1263, 1216, 1162, 1104, 997, 815, 744, 681, 640  $\text{cm}^{-1}$ ; HRMS (Q-TOF, ESI) calcd for  $\text{C}_{22}\text{H}_{16}\text{ClF}_3\text{N}_3\text{O}$   $[\text{M}+\text{H}]^+$  430.929, found 430.0936.

**1-(Benzo[d][1,3]dioxol-5-yl)-4,4,4-trifluoro-3-(1-pyrimidin-2-yl)-1H-indol-2-yl)butan-1-one (3o):**

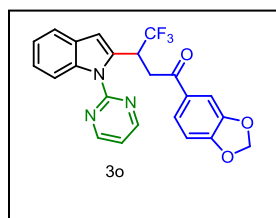

81 mg (92%); off white solid; mp = 109.7–110.2  $^\circ\text{C}$ ;  $^1\text{H}$  NMR (400 MHz,  $\text{CDCl}_3$ )  $\delta$  8.81 (d,  $J = 4.8$  Hz, 2H), 8.25 (d,  $J = 8.4$  Hz, 1H), 7.57–7.54 (m, 2H), 7.39 (d,  $J = 1.6$  Hz, 1H), 7.29–7.25 (m, 1H), 7.21–7.17 (m, 2H), 6.83 (d,  $J = 8.4$  Hz, 1H), 6.78 (s, 1H), 6.01 (s, 2H), 5.99–5.88 (m, 1H) 3.76 (dd,  $J = 17.6, 8.4$  Hz, 1H), 3.58 (dd,  $J = 17.6, 5.2$  Hz, 1H);  $^{13}\text{C}$  NMR (100 MHz,  $\text{CDCl}_3$ )  $\delta$  193.2, 158.3, 158.0, 152.0, 148.2, 136.9, 134.4, 131.1, 128.4, 126.7 (q,  $J_{\text{C-F}} = 278.1$  Hz), 124.4, 123.8, 122.1, 120.4, 117.6, 114.2, 107.9, 107.8, 107.2, 101.9, 39.0, 37.4 (q,  $J_{\text{C-F}} = 28.0$  Hz); IR (KBr)  $\nu$  3047, 2992, 2962, 2943, 1679, 1607, 1750, 1425, 1349, 1255, 1157,



1103, 1039, 934, 892, 810, 748  $\text{cm}^{-1}$ ; HRMS (Q-TOF, ESI) calcd for  $\text{C}_{23}\text{H}_{17}\text{F}_3\text{N}_3\text{O}_3$   $[\text{M}+\text{H}]^+$  440.1217, found 440.1242.

**4,4,4-Trifluoro-3-(1-(pyrimidin-2-yl)-1H-indol-2-yl)-1-(thiophen-2-yl)butan-1-one (3p):**

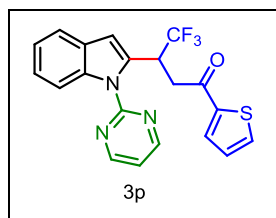

73 mg (91%); white solid; mp = 152.3–152.8  $^{\circ}\text{C}$ ;  $^1\text{H}$  NMR (400 MHz,  $\text{CDCl}_3$ )  $\delta$  8.79 (d,  $J$  = 4.8 Hz, 2H), 8.27 (d,  $J$  = 8.0 Hz, 1H), 7.75 (dd,  $J$  = 4.0, 1.2 Hz, 1H), 7.62 (dd,  $J$  = 4.8, 1.2 Hz, 1H), 7.56 (d,  $J$  = 7.6 Hz, 1H), 7.30–7.26 (m, 1H), 7.22–7.20 (m, 1H), 7.16 (t,  $J$  = 4.8 Hz, 1H), 7.10 (dd,  $J$  = 4.8, 4.0 Hz, 1H), 6.82 (s, 1H), 5.98–5.88 (m, 1H) 3.74 (dd,  $J$  = 17.2, 8.0 Hz, 1H), 3.62 (dd,  $J$  = 17.2, 5.2 Hz, 1H);  $^{13}\text{C}$  NMR (100 MHz,  $\text{CDCl}_3$ )  $\delta$  188.1, 158.3, 157.9, 143.4, 136.9, 134.2, 134.0, 132.1, 128.4, 128.2, 126.3 (q,  $J_{\text{C-F}}$  = 278.3 Hz), 123.9, 122.1, 120.5, 117.6, 114.3, 107.4, 39.8, 37.4 (q,  $J_{\text{C-F}}$  = 28.2 Hz); IR (KBr)  $\nu$  3104, 3046, 2926, 1668, 1567, 1517, 1457, 1422, 1350, 1316, 1239, 1316, 1239, 1163, 1105, 1036, 820, 755, 734  $\text{cm}^{-1}$ ; HRMS (Q-TOF, ESI) calcd for  $\text{C}_{20}\text{H}_{15}\text{F}_3\text{N}_3\text{OS}$   $[\text{M}+\text{H}]^+$  402.0883, found 402.0902.

**4,4,4-Trifluoro-3-(1-(pyridin-2-yl)-1H-indol-2-yl)-1-(p-tolyl)butan-1-one (4b):**

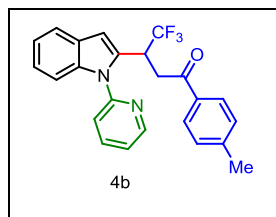

66 mg (81%); white solid; mp = 77.2–78.5  $^{\circ}\text{C}$ ;  $^1\text{H}$  NMR (400 MHz,  $\text{CDCl}_3$ )  $\delta$  8.67 (d,  $J$  = 1.6 Hz, 1H), 7.95 (td,  $J$  = 7.6, 2.0 Hz, 1H), 7.84 (d,  $J$  = 8.0 Hz, 2H), 7.69 (d,  $J$  = 8.0 Hz, 1H), 7.58 (d,  $J$  = 7.6 Hz, 1H), 7.38–7.34 (m, 2H), 7.25 (d,  $J$  = 8.0 Hz, 2H), 7.18 (t,  $J$  = 7.2 Hz, 1H), 7.13 (t,  $J$  = 7.2 Hz, 1H), 6.72 (s, 1H), 4.91–4.81 (m, 1H), 3.86 (dd,  $J$  = 18.0, 9.2 Hz, 1H), 3.69 (dd,  $J$  = 18.0, 4.8 Hz, 1H), 2.39 (s, 3H);  $^{13}\text{C}$  NMR (100 MHz,  $\text{CDCl}_3$ )  $\delta$  194.7, 150.9, 149.8, 144.5, 138.6, 137.3, 133.8, 133.7, 129.4, 128.2, 127.7, 126.3 (q,  $J_{\text{C-F}}$  = 278.0 Hz), 122.9, 122.5, 121.8, 121.0, 120.6, 110.8, 103.8, 38.8, 36.8 (q,  $J_{\text{C-F}}$  = 28.5 Hz), 21.7; IR (KBr)  $\nu$  3055, 2926, 1683, 1586, 1465, 1346, 1318, 1260, 1161, 1104, 1025, 991, 762, 746, 678  $\text{cm}^{-1}$ ; HRMS (Q-TOF, ESI) calcd for  $\text{C}_{24}\text{H}_{20}\text{F}_3\text{N}_2\text{O}$   $[\text{M}+\text{H}]^+$  409.1522, found 409.1540.

**3-(1-(Benzo[d]thiazol-2-yl)-1H-indol-2-yl)-4,4,4-trifluoro-1-(p-tolyl)butan-1-one (4c):**

77 mg (83%); light yellow solid; mp = 119.6–121.4  $^{\circ}\text{C}$ ;  $^1\text{H}$  NMR (400 MHz,  $\text{CDCl}_3$ )  $\delta$  8.04 (d,  $J$  = 8.0 Hz, 1H), 7.88 (dd,  $J$  = 17.2, 8.0 Hz, 2H), 7.82 (d,  $J$  = 8.0 Hz, 2H), 7.57 (d,  $J$  = 7.6 Hz, 1H), 7.53 (td,  $J$  = 8.0, 1.2 Hz, 1H), 7.44 (td,  $J$  = 8.0, 1.2 Hz, 1H), 7.28 (td,  $J$  = 8.0, 1.2 Hz, 1H), 7.22

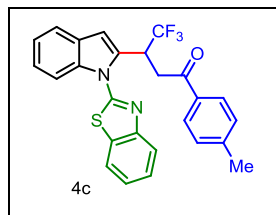

(d,  $J = 8.0$  Hz, 3H), 6.78 (s, 1H), 5.44–5.34 (m, 1H), 3.84 (dd,  $J = 17.6$ , 9.6 Hz, 1H), 3.66 (dd,  $J = 17.6$ , 4.4 Hz, 1H), 2.38 (s, 3H);  $^{13}\text{C}$  NMR (100 MHz,  $\text{CDCl}_3$ )  $\delta$  194.3, 157.1, 150.2, 144.5, 137.4, 134.9, 134.4, 133.6, 129.4, 128.2, 126.5, 126.3 (q,  $J_{\text{C-F}} = 278.1$  Hz), 125.5, 123.9, 123.5, 122.4, 121.5, 120.9, 111.6, 106.3, 39.0, 37.0 (q,  $J_{\text{C-F}} = 28.5$  Hz), 21.7; IR (KBr)  $\nu$  3055, 2942, 1687, 1518, 1432, 1335, 1264, 1209, 1182, 1155, 1111, 975, 949, 814, 752  $\text{cm}^{-1}$ ; HRMS (Q-TOF, ESI) calcd for  $\text{C}_{26}\text{H}_{20}\text{F}_3\text{N}_2\text{OS}$   $[\text{M}+\text{H}]^+$  465.1243, found 465.1558.

### 3-(1-(Benzo[d]oxazol-2-yl)-1H-indol-2-yl)-4,4,4-trifluoro-1-(p-tolyl)butan-1-one (4d):

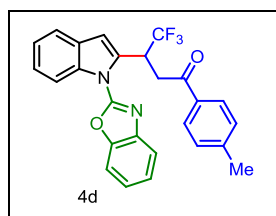

63 mg (70%); light yellow solid; mp = 113.4–113.9  $^{\circ}\text{C}$ ;  $^1\text{H}$  NMR (400 MHz,  $\text{CDCl}_3$ )  $\delta$  8.27 (d,  $J = 8.4$  Hz, 1H), 7.82 (d,  $J = 8.4$  Hz, 2H), 7.61–7.59 (m, 1H), 7.54 (d,  $J = 7.6$  Hz, 1H), 7.50 (d,  $J = 8.0$  Hz, 1H), 7.40–7.33 (m, 3H), 7.24–7.21 (m, 3H), 6.78 (s, 1H), 6.00–5.90 (m, 1H), 3.84 (dd,  $J = 17.6$ , 10.0 Hz, 1H), 3.69 (dd,  $J = 18.0$ , 4.0 Hz, 1H), 2.36 (s, 3H);  $^{13}\text{C}$  NMR (100 MHz,  $\text{CDCl}_3$ )  $\delta$  194.4, 154.4, 148.6, 140.7, 136.5, 134.2, 133.6, 129.4, 128.3, 128.2, 126.4 (q,  $J_{\text{C-F}} = 278.0$  Hz), 124.9, 124.7, 124.3, 123.0, 120.8, 119.6, 114.1, 110.2, 108.4, 38.9, 37.2 (q,  $J_{\text{C-F}} = 28.6$  Hz), 21.6; IR (KBr)  $\nu$  3033, 2923, 1682, 1624, 1570, 1457, 1409, 1311, 1239, 1180, 1107, 1041, 978, 807, 748, 682  $\text{cm}^{-1}$ ; HRMS (Q-TOF, ESI) calcd for  $\text{C}_{26}\text{H}_{20}\text{F}_3\text{N}_2\text{O}_2$   $[\text{M}+\text{H}]^+$  449.1472, found 449.1484.

### 4,4,4-Trifluoro-3-(1-(thiazol-2-yl)-1H-indol-2-yl)-1-(p-tolyl)butan-1-one (4e):

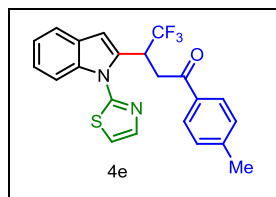

60 mg (72%); white sticky solid;  $^1\text{H}$  NMR (400 MHz,  $\text{CDCl}_3$ )  $\delta$  7.84 (d,  $J = 3.6$  Hz, 1H), 7.82 (d,  $J = 8.4$  Hz, 2H), 7.61 (d,  $J = 8.4$  Hz, 1H), 7.55 (d,  $J = 8.0$  Hz, 1H), 7.45 (d,  $J = 3.6$  Hz, 1H), 7.25–7.22 (m, 3H), 7.18 (t,  $J = 8.0$  Hz, 1H), 6.72 (s, 1H), 5.13–5.03 (m, 1H), 3.83 (dd,  $J = 17.6$ , 9.6 Hz, 1H), 3.60 (dd,  $J = 17.6$ , 4.0 Hz, 1H), 2.39 (s, 3H);  $^{13}\text{C}$  NMR (100 MHz,  $\text{CDCl}_3$ )  $\delta$  194.3, 157.8, 144.5, 140.8, 137.8, 134.8, 133.6, 129.4, 128.2, 127.9, 126.3 (q,  $J_{\text{C-F}} = 279.0$  Hz), 123.6, 121.9, 120.7, 119.3, 111.1, 105.1, 38.8, 36.7 (q,  $J_{\text{C-F}} = 28.8$  Hz), 21.6; IR (KBr)  $\nu$  3058, 2924, 2855, 1684, 1608, 1456, 1310, 1259, 1221, 1160, 1105, 986, 938, 809, 742, 684  $\text{cm}^{-1}$ ; HRMS (Q-TOF, ESI) calcd for  $\text{C}_{22}\text{H}_{18}\text{F}_3\text{N}_2\text{OS}$   $[\text{M}+\text{H}]^+$  415.1087, found 415.1105.

### 3-(4-Bromo-1-(pyrimidin-2-yl)-1H-indol-2-yl)-4,4,4-trifluoro-1-(p-tolyl)butan-1-one (4f):

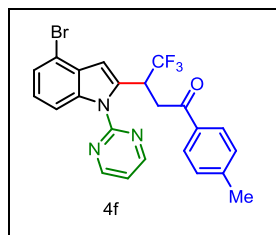

88 mg (90%); white solid; mp = 141.8–142.6 °C;  $^1\text{H}$  NMR (400 MHz,  $\text{CDCl}_3$ )  $\delta$  8.84 (t,  $J = 4.4$  Hz, 2H), 8.20–8.17 (m, 1H), 7.85–7.84 (m, 2H), 7.37–7.34 (m, 1H), 7.25–7.23 (m, 3H), 7.15–7.10 (m, 1H), 6.84 (d,  $J = 2.8$  Hz, 1H), 5.96–5.88 (m, 1H), 3.85–3.68 (m, 2H), 2.39 (s, 3H);  $^{13}\text{C}$  NMR (100 MHz,  $\text{CDCl}_3$ )  $\delta$  194.7, 158.4, 157.8, 144.5, 137.2, 135.4, 133.7, 129.4, 129.0, 128.2, 126.6 (q,  $J_{\text{C-F}} = 278.1$  Hz), 124.9, 124.6, 118.1, 114.2, 113.4, 106.9, 39.2, 37.3 (q,  $J_{\text{C-F}} = 28.2$  Hz), 21.7; IR (KBr)  $\nu$  3077, 3053, 2955, 2917, 1675, 1607, 1569, 1436, 1332, 1264, 1181, 1156, 1115, 994, 816, 765, 728  $\text{cm}^{-1}$ ; HRMS (Q-TOF, ESI) calcd for  $\text{C}_{23}\text{H}_{18}\text{BrF}_3\text{N}_3\text{O}$   $[\text{M}+\text{H}]^+$  488.0580, found 488.0607.

### 4,4,4-Trifluoro-3-(5-methyl-1-(pyrimidin-2-yl)-1H-indol-2-yl)-1-(p-tolyl)butan-1-one (4g):

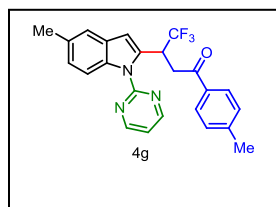

76 mg (90%); white solid; mp = 106.5–108.4 °C;  $^1\text{H}$  NMR (400 MHz,  $\text{CDCl}_3$ )  $\delta$  8.77 (d,  $J = 4.8$  Hz, 2H), 8.17 (d,  $J = 8.8$  Hz, 1H), 7.84 (d,  $J = 8.4$  Hz, 2H), 7.31 (s, 1H), 7.24 (d,  $J = 8.0$  Hz, 2H), 7.14 (t,  $J = 4.8$  Hz, 1H), 7.09 (dd,  $J = 8.4, 1.2$  Hz, 1H), 6.70 (s, 1H), 6.03–5.93 (m, 1H), 3.80 (dd,  $J = 17.6, 8.4$  Hz, 1H), 3.63 (dd,  $J = 17.6, 4.8$  Hz, 1H), 2.41 (s, 3H), 2.39 (s, 3H);  $^{13}\text{C}$  NMR (100 MHz,  $\text{CDCl}_3$ )  $\delta$  194.9, 158.2, 158.1, 144.3, 135.2, 134.4, 133.9, 131.5, 129.3, 128.6, 128.2, 126.8 (q,  $J_{\text{C-F}} = 278.4$  Hz), 125.2, 120.1, 117.3, 114.1, 107.1, 39.1, 37.4 (q,  $J_{\text{C-F}} = 28.0$  Hz), 21.6, 21.3; IR (KBr)  $\nu$  2990, 2921, 2853, 1681, 1573, 1479, 1459, 1424, 1322, 1259, 1241, 1195, 1104, 810, 684  $\text{cm}^{-1}$ ; HRMS (Q-TOF, ESI) calcd for  $\text{C}_{24}\text{H}_{21}\text{F}_3\text{N}_3\text{O}$   $[\text{M}+\text{H}]^+$  424.1631, found 424.1642.

### 4,4,4-Trifluoro-3-(5-fluoro-1-(pyrimidin-2-yl)-1H-indol-2-yl)-1-(p-tolyl)butan-1-one (4h):

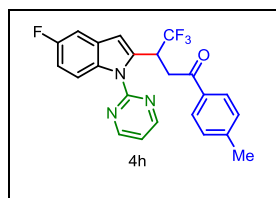

85 mg (96%); white solid; mp = 96.0–96.3 °C;  $^1\text{H}$  NMR (400 MHz,  $\text{CDCl}_3$ )  $\delta$  8.79 (d,  $J = 4.8$  Hz, 2H), 8.23 (dd,  $J = 9.2, 4.8$  Hz, 1H), 7.84 (d,  $J = 8.0$  Hz, 2H), 7.24 (d,  $J = 8.0$  Hz, 2H), 7.20–7.16 (m, 2H), 7.00 (td,  $J = 9.2, 2.0$  Hz, 1H), 6.73 (s, 1H), 6.03–5.93 (m, 1H), 3.80 (dd,  $J = 17.6, 8.4$  Hz, 1H), 3.65 (dd,  $J = 17.6, 4.8$  Hz, 1H), 2.39 (s, 3H);  $^{13}\text{C}$  NMR (100 MHz,  $\text{CDCl}_3$ )  $\delta$  194.7, 158.9, (d,  $J_{\text{C-F}} = 236.5$  Hz), 158.3, 158.0, 144.4, 136.1, 133.7, 133.3, 129.4, 129.0 (d,  $J_{\text{C-F}} = 10.2$  Hz), 128.2, 126.7 (q,  $J_{\text{C-F}} = 278.3$  Hz), 117.9, 115.5 (d,  $J_{\text{C-F}} = 9.1$

Hz), 111.7 (d,  $J_{C-F} = 25.0$  Hz), 107.0, 105.4 (d,  $J_{C-F} = 23.4$  Hz), 39.1, 37.4 (q,  $J_{C-F} = 28.0$  Hz), 21.6; IR (KBr)  $\nu$  3078, 2960, 2927, 1677, 1604, 1571, 1474, 1452, 1426, 1338, 1287, 1263, 1210, 1184, 1157, 1116, 994, 855, 793  $\text{cm}^{-1}$ ; HRMS (Q-TOF, ESI) calcd for  $\text{C}_{23}\text{H}_{18}\text{F}_4\text{N}_3\text{O}$   $[\text{M}+\text{H}]^+$  428.1381, found 428.1389.

**3-(5-Bromo-1-(pyrimidin-2-yl)-1H-indol-2-yl)-4,4,4-trifluoro-1-(p-tolyl)butan-1-one (4i):**

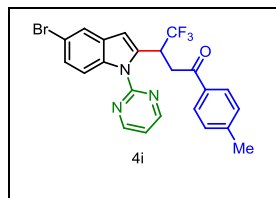

95 mg (97%); white solid; mp = 88.4–89.2 °C;  $^1\text{H}$  NMR (400 MHz,  $\text{CDCl}_3$ )  $\delta$  8.81 (d,  $J = 4.8$  Hz, 2H), 8.15 (d,  $J = 8.8$  Hz, 1H), 7.84 (d,  $J = 8.4$  Hz, 2H), 7.65 (d,  $J = 2.0$  Hz, 1H), 7.34 (dd,  $J = 8.4, 2.0$  Hz, 1H), 7.24 (d,  $J = 7.2$  Hz, 2H), 7.21 (t,  $J = 4.8$  Hz, 1H), 6.70 (s, 1H), 6.01–5.91 (m, 1H), 3.80 (dd,  $J = 18.0, 8.8$  Hz, 1H), 3.64 (dd,  $J = 18.0, 4.8$  Hz, 1H), 2.40 (s, 3H);  $^{13}\text{C}$  NMR (100 MHz,  $\text{CDCl}_3$ )  $\delta$  194.7, 158.4, 157.8, 144.5, 135.8, 135.6, 133.7, 130.1, 129.4, 128.2, 126.6 (q,  $J_{C-F} = 278.3$  Hz), 126.5, 122.9, 117.9, 116.0, 115.2, 106.4, 39.1, 37.3 (q,  $J_{C-F} = 28.1$  Hz), 21.7; IR (KBr)  $\nu$  2994, 2954, 2922, 1681, 1605, 1568, 1424, 1318, 1258, 1156, 1104, 869, 806, 680  $\text{cm}^{-1}$ ; HRMS (Q-TOF, ESI) calcd for  $\text{C}_{23}\text{H}_{18}\text{BrF}_3\text{N}_3\text{O}$   $[\text{M}+\text{H}]^+$  488.0580, found 488.0586.

**4,4,4-Trifluoro-3-(5-methoxy-1-(pyrimidin-2-yl)-1H-indol-2-yl)-1-(p-tolyl)butan-1-one (4j):**

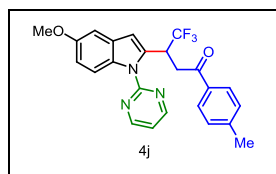

80 mg (91%); white solid; mp = 95.9–96.2 °C;  $^1\text{H}$  NMR (400 MHz,  $\text{CDCl}_3$ )  $\delta$  8.76 (d,  $J = 4.8$  Hz, 2H), 8.22 (d,  $J = 8.8$  Hz, 1H), 7.84 (d,  $J = 7.6$  Hz, 2H), 7.24 (d,  $J = 7.6$  Hz, 2H), 7.14 (t,  $J = 4.8$  Hz, 1H), 6.99 (d,  $J = 2.4$  Hz, 1H), 6.91 (dd,  $J = 8.8, 2.4$  Hz, 1H), 6.71 (s, 1H), 6.06–5.96 (m, 1H), 3.82 (s, 3H), 3.80 (dd,  $J = 17.6, 8.4$  Hz, 1H), 3.64 (dd,  $J = 17.6, 4.8$  Hz, 1H), 2.39 (s, 3H);  $^{13}\text{C}$  NMR (100 MHz,  $\text{CDCl}_3$ )  $\delta$  194.8, 158.2, 158.1, 155.5, 144.3, 135.0, 133.8, 131.8, 129.3, 129.1, 128.2, 126.7 (q,  $J_{C-F} = 278.5$  Hz), 117.3, 115.5, 113.2, 107.2, 102.3, 55.7, 39.1, 37.4 (q,  $J_{C-F} = 28.0$  Hz), 21.6; IR (KBr)  $\nu$  3043, 2932, 2835, 1692, 1612, 1568, 1476, 1428, 1337, 1262, 1212, 1152, 1104, 1033, 982, 854, 805  $\text{cm}^{-1}$ ; HRMS (Q-TOF, ESI) calcd for  $\text{C}_{24}\text{H}_{21}\text{F}_3\text{N}_3\text{O}_2$   $[\text{M}+\text{H}]^+$  440.1581, found 440.1590.

**3-(5-(Benzyloxy)-1-(pyrimidin-2-yl)-1*H*-indol-2-yl)-4,4,4-trifluoro-1-(*p*-tolyl)butan-1-one (4k):**

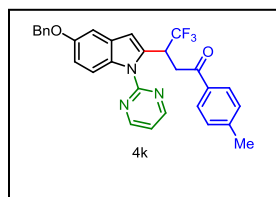

95 mg (92%); white solid; mp = 150.8–151.4 °C; <sup>1</sup>H NMR (400 MHz, CDCl<sub>3</sub>) δ 8.75 (d, *J* = 4.8 Hz, 2H), 8.22 (d, *J* = 9.2 Hz, 1H), 7.84 (d, *J* = 8.4 Hz, 2H), 7.44 (d, *J* = 7.2 Hz, 2H), 7.37 (t, *J* = 7.6 Hz, 2H), 7.30 (t, *J* = 7.2 Hz, 1H), 7.23 (d, *J* = 7.6 Hz, 2H), 7.13 (t, *J* = 4.8 Hz, 1H), 7.06 (d, *J* = 2.4 Hz, 1H), 6.99 (dd, *J* = 9.2, 2.4 Hz, 1H), 6.69 (s, 1H), 6.05–5.95 (m, 1H), 5.09 (s, 2H), 3.79 (dd, *J* = 17.6, 8.4 Hz, 1H), 3.63 (dd, *J* = 17.6, 4.8 Hz, 1H), 2.38 (s, 3H); <sup>13</sup>C NMR (100 MHz, CDCl<sub>3</sub>) δ 194.8, 158.2, 158.0, 154.6, 144.3, 137.4, 135.0, 133.8, 132.0, 129.3, 129.1, 128.5, 128.2, 127.8, 127.4, 126.7 (q, *J*<sub>C-F</sub> = 278.6 Hz), 117.3, 115.5, 113.9, 107.2, 103.9, 70.6, 39.1, 37.4 (q, *J*<sub>C-F</sub> = 27.9 Hz), 21.6; IR (KBr) ν 3032, 2991, 2919, 2871, 1686, 1612, 1570, 1475, 1430, 1327, 1302, 1265, 1186, 1152, 1096, 1014, 807, 748, 703 cm<sup>-1</sup>; HRMS (Q-TOF, ESI) calcd for C<sub>30</sub>H<sub>25</sub>F<sub>3</sub>N<sub>3</sub>O<sub>2</sub> [M+H]<sup>+</sup> 516.1894, found 516.1907.

**4,4,4-Trifluoro-3-(5-nitro-1-(pyrimidin-2-yl)-1*H*-indol-2-yl)-1-(*p*-tolyl)butan-1-one (4l):**

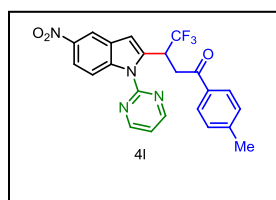

87 mg (96%); white solid; mp = 153.7–154.7 °C; <sup>1</sup>H NMR (400 MHz, CDCl<sub>3</sub>) δ 8.90 (d, *J* = 4.8 Hz, 2H), 8.46 (d, *J* = 2.0 Hz, 1H), 8.28 (d, *J* = 9.2 Hz, 1H), 8.14 (dd, *J* = 9.2, 2.0 Hz, 1H), 7.84 (d, *J* = 8.0 Hz, 2H), 7.34 (t, *J* = 4.8 Hz, 1H), 7.25 (d, *J* = 8.0 Hz, 2H), 6.90 (s, 1H), 5.96–5.86 (m, 1H), 3.84 (dd, *J* = 18.0, 9.2 Hz, 1H), 3.68 (dd, *J* = 17.6, 4.4 Hz, 1H), 2.40 (s, 3H); <sup>13</sup>C NMR (100 MHz, CDCl<sub>3</sub>) δ 194.5, 158.6, 157.4, 144.7, 143.1, 139.7, 138.0, 133.5, 129.4, 128.2, 127.8, 126.4 (q, *J*<sub>C-F</sub> = 278.0 Hz), 118.9, 118.7, 117.0, 114.5, 107.8, 39.0, 37.3 (q, *J*<sub>C-F</sub> = 28.2 Hz), 21.6; IR (KBr) ν 3076, 2923, 1680, 1608, 1569, 1516, 1455, 1422, 1340, 1263, 1161, 1116, 1078, 992, 811, 751, 682 cm<sup>-1</sup>; HRMS (Q-TOF, ESI) calcd for C<sub>23</sub>H<sub>18</sub>F<sub>3</sub>N<sub>4</sub>O<sub>3</sub> [M+H]<sup>+</sup> 455.1326, found 455.1334.

**3-(6-Chloro-1-(pyrimidin-2-yl)-1*H*-indol-2-yl)-4,4,4-trifluoro-1-(*p*-tolyl)butan-1-one (4m):**

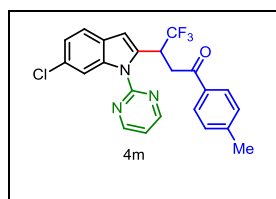

80 mg (90%); Light yellow solid; mp = 149.3–149.5 °C; <sup>1</sup>H NMR (400 MHz, CDCl<sub>3</sub>) δ 8.82 (d, *J* = 4.8 Hz, 2H), 8.32 (d, *J* = 1.6 Hz, 1H), 7.83 (d, *J* = 8.0 Hz, 2H), 7.43 (d, *J* = 8.4 Hz, 1H), 7.25–7.20 (m, 3H), 7.16 (dd, *J* = 8.0, 1.6 Hz, 1H), 6.74 (s, 1H), 6.00–5.90 (m, 1H), 3.79 (dd, *J* = 18.0, 8.8

Hz, 1H), 3.64 (dd,  $J = 18.0, 4.8$  Hz, 1H), 2.39 (s, 3H);  $^{13}\text{C}$  NMR (100 MHz,  $\text{CDCl}_3$ )  $\delta$  194.7, 158.4, 157.8, 144.5, 137.2, 135.3, 133.7, 129.7, 129.4, 128.2, 126.9, 126.6 (q,  $J_{\text{C-F}} = 278.4$  Hz), 122.7, 121.1, 117.8, 114.6, 107.0, 39.1, 37.4 (q,  $J_{\text{C-F}} = 28.1$  Hz), 21.6; IR (KBr)  $\nu$  3097, 3053, 2942, 1673, 1605, 1569, 1465, 1425, 1325, 1256, 1183, 1152, 1113, 993, 959, 933, 820, 718  $\text{cm}^{-1}$ ; HRMS (Q-TOF, ESI) calcd for  $\text{C}_{23}\text{H}_{18}\text{ClF}_3\text{N}_3\text{O}$   $[\text{M}+\text{H}]^+$  444.1085, found 444.1093.

**3-(6-Chloro-5-fluoro-1-(pyrimidin-2-yl)-1H-indol-2-yl)-4,4,4-trifluoro-1-(p-tolyl)butan-1-one (4n):**

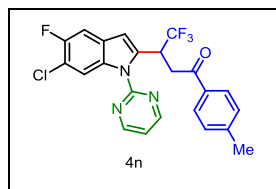

87 mg (96%); white solid; mp = 151.7–152.4 °C;  $^1\text{H}$  NMR (400 MHz,  $\text{CDCl}_3$ )  $\delta$  8.83 (d,  $J = 4.8$  Hz, 2H), 8.41 (d,  $J = 6.4$  Hz, 1H), 7.83 (d,  $J = 8.4$  Hz, 2H), 7.26 (t,  $J = 2.0$  Hz, 2H), 7.24 (s, 2H), 6.70 (s, 1H), 6.04–5.94 (m, 1H), 3.79 (dd,  $J = 17.6, 8.8$  Hz, 1H), 3.65 (dd,  $J = 17.6, 4.4$  Hz, 1H), 2.40 (s, 3H);  $^{13}\text{C}$  NMR (100 MHz,  $\text{CDCl}_3$ )  $\delta$  194.6, 158.4, 157.7, 154.1 (d,  $J_{\text{C-F}} = 239.4$  Hz), 144.6, 136.6, 133.6, 133.0, 129.4, 128.2, 127.4 (d,  $J_{\text{C-F}} = 9.1$  Hz), 126.5 (q,  $J_{\text{C-F}} = 278.4$  Hz), 117.9, 117.2 (d,  $J_{\text{C-F}} = 10.1$  Hz), 116.3, 106.8, 106.4 (d,  $J_{\text{C-F}} = 23.3$  Hz), 39.1, 37.5 (q,  $J_{\text{C-F}} = 28.3$  Hz), 21.7; IR (KBr)  $\nu$  3134, 3002, 2920, 1681, 1606, 1574, 1454, 1417, 1318, 1267, 1180, 1097, 991, 872, 810, 680  $\text{cm}^{-1}$ ; HRMS (Q-TOF, ESI) calcd for  $\text{C}_{23}\text{H}_{17}\text{ClF}_4\text{N}_3\text{O}$   $[\text{M}+\text{H}]^+$  462.0991, found 462.1000.

**4,4,4-trifluoro-3-(7-methyl-1-(pyrimidin-2-yl)-1H-indol-2-yl)-1-(p-tolyl)butan-1-one (4o):**

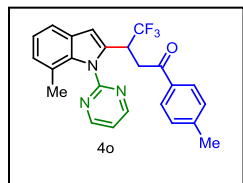

75 mg (89%); light orange sticky solid;  $^1\text{H}$  NMR (500 MHz,  $\text{CDCl}_3$ )  $\delta$  8.91 (d,  $J = 4.5$  Hz, 2H), 7.78 (d,  $J = 7.5$  Hz, 2H), 7.42 (d,  $J = 7.5$  Hz, 1H), 7.34 (s, 1H), 7.22 (d,  $J = 7.5$  Hz, 2H), 7.08 (t,  $J = 7.5$  Hz, 1H), 7.00 (d,  $J = 7.0$  Hz, 1H), 6.72 (s, 1H), 4.96–4.88 (m, 1H), 3.77 (dd,  $J = 18.0, 8.5$  Hz, 1H), 3.56 (dd,  $J = 17.5, 3.5$  Hz, 1H), 2.38 (s, 3H), 1.97 (s, 3H);  $^{13}\text{C}$  NMR (125 MHz,  $\text{CDCl}_3$ )  $\delta$  194.4, 158.5, 158.2, 144.4, 136.7, 135.1, 133.6, 129.3, 129.0, 128.2, 126.4 (q,  $J_{\text{C-F}} = 278.0$  Hz), 126.2, 122.5, 121.8, 119.3, 118.5, 105.2, 39.2, 36.5 (q,  $J_{\text{C-F}} = 28.5$  Hz), 21.6, 20.3; IR (KBr)  $\nu$  3045, 2960, 2926, 2861, 1686, 1607, 1565, 1420, 1346, 1300, 1264, 1155, 1108, 988, 850, 745, 702  $\text{cm}^{-1}$ ; HRMS (Q-TOF, ESI) calcd for  $\text{C}_{24}\text{H}_{21}\text{F}_3\text{N}_3\text{O}$   $[\text{M}+\text{H}]^+$  424.1631, found 424.1644.

**1-(Pyrimidin-2-yl)-2-(1,1,1-trifluoro-4-oxo-4-(*p*-tolyl)butan-2-yl)-1,5,6,7-tetrahydro-4*H*-indol-4-one (4p):**

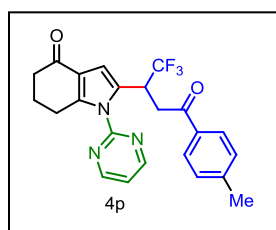

82 mg (96%); white solid; mp = 119.0–121.3 °C;  $^1\text{H}$  NMR (400 MHz,  $\text{CDCl}_3$ )  $\delta$  8.88 (d,  $J$  = 4.8 Hz, 2H), 8.82 (d,  $J$  = 8.4 Hz, 2H), 7.36 (t,  $J$  = 4.8 Hz, 1H), 7.25 (d,  $J$  = 8.0 Hz, 2H), 6.73 (s, 1H), 5.41–5.31 (m, 1H), 3.75 (dd,  $J$  = 17.6, 8.8 Hz, 1H), 3.49 (dd,  $J$  = 18.0, 4.0 Hz, 1H), 3.12–3.05 (m, 1H), 2.94–2.87 (m, 1H), 2.51–2.47 (m, 2H), 2.40 (s, 3H), 2.16–2.03 (m, 2H);  $^{13}\text{C}$  NMR (100 MHz,  $\text{CDCl}_3$ )  $\delta$  194.9, 194.8, 158.6, 156.8, 146.2, 145.5, 133.5, 129.3, 129.3, 128.2, 126.4 (q,  $J_{\text{C-F}}$  = 278.0 Hz), 121.6, 119.3, 107.3, 38.5, 37.6, 36.3 (q,  $J_{\text{C-F}}$  = 28.3 Hz), 24.5, 23.7, 21.6; IR (KBr)  $\nu$  3052, 2949, 2925, 2874, 1679, 1635, 1570, 1467, 1422, 1290, 1263, 1154, 1115, 992, 943, 831, 706  $\text{cm}^{-1}$ ; HRMS (Q-TOF, ESI) calcd for  $\text{C}_{23}\text{H}_{21}\text{F}_3\text{N}_3\text{O}_2$   $[\text{M}+\text{H}]^+$  428.1581, found 428.1594.

**1-(Pyrimidin-2-yl)-5-(1,1,1-trifluoro-4-oxo-4-(*p*-tolyl)butan-2-yl)-1*H*-pyrrole-2-carbaldehyde (4q):**

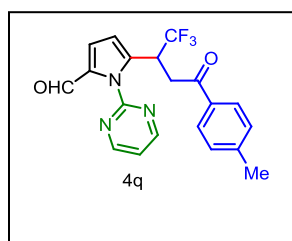

30 mg (39%); white solid; mp = 108.9–110.6 °C;  $^1\text{H}$  NMR (400 MHz,  $\text{CDCl}_3$ )  $\delta$  9.67 (s, 1H), 8.87 (d,  $J$  = 4.8 Hz, 2H), 7.79 (d,  $J$  = 8.0 Hz, 2H), 7.40 (t,  $J$  = 4.8 Hz, 1H), 7.24 (d,  $J$  = 8.0 Hz, 2H), 7.10 (d,  $J$  = 4.0 Hz, 1H), 6.46 (d,  $J$  = 4.0 Hz, 1H), 5.07–4.97 (m, 1H), 3.67 (dd,  $J$  = 18.0, 8.0 Hz, 1H), 3.56 (dd,  $J$  = 17.6, 4.4 Hz, 1H), 2.40 (s, 3H);  $^{13}\text{C}$  NMR (100 MHz,  $\text{CDCl}_3$ )  $\delta$  194.2, 179.5, 158.1, 156.5, 144.6, 135.8, 134.4, 133.4, 129.4, 128.2, 126.1 (q,  $J_{\text{C-F}}$  = 277.8 Hz), 121.3, 120.0, 110.8, 38.8, 36.4 (q,  $J_{\text{C-F}}$  = 28.7 Hz), 21.6; IR (KBr)  $\nu$  2923, 2854, 1664, 1605, 1573, 1480, 1441, 1416, 1304, 1247, 1220, 1161, 1117, 1039, 826, 726  $\text{cm}^{-1}$ ; HRMS (Q-TOF, ESI) calcd for  $\text{C}_{20}\text{H}_{17}\text{F}_3\text{N}_3\text{O}_2$   $[\text{M}+\text{H}]^+$  388.1268, found 388.1283.

**4,4,4-Trifluoro-3-(1-(pyrimidin-2-yl)-1*H*-pyrrol-2-yl)-1-(*p*-tolyl)butan-1-one (4r):**

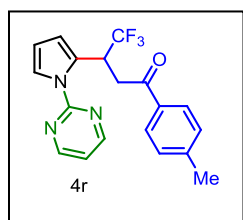

42 mg (58%); light orange solid; mp = 96.0–96.6 °C;  $^1\text{H}$  NMR (400 MHz,  $\text{CDCl}_3$ )  $\delta$  8.65 (d,  $J$  = 4.0 Hz, 2H), 7.84 (d,  $J$  = 8.0 Hz, 2H), 7.82–7.79 (m, 1H), 7.24 (d,  $J$  = 8.0 Hz, 2H), 7.11–7.07 (m, 1H), 6.37 (s, 1H), 6.30–6.24 (m, 1H), 6.23–6.21 (m, 1H), 3.75–3.67 (m, 1H), 3.57–3.51 (m, 1H), 2.40 (s, 3H);  $^{13}\text{C}$  NMR (100 MHz,  $\text{CDCl}_3$ )  $\delta$  195.3, 158.1, 157.7, 144.2, 134.0,

129.3, 128.2, 127.8, 126.9 (q,  $J_{C-F} = 278.0$  Hz), 122.6, 117.5, 113.0, 109.9, 38.8, 37.0 (q,  $J_{C-F} = 28.0$  Hz), 21.6; IR (KBr)  $\nu$  3057, 2994, 1677, 1608, 1577, 1479, 1435, 1349, 1303, 1249, 1184, 1150, 1102, 944, 882, 813, 730  $\text{cm}^{-1}$ ; HRMS (Q-TOF, ESI) calcd for  $\text{C}_{19}\text{H}_{17}\text{F}_3\text{N}_3\text{O}$   $[\text{M}+\text{H}]^+$  360.1318, found 360.1331.

### 3,3'-(1-(Pyrimidin-2-yl)-1*H*-pyrrole-2,5-diyl)bis(4,4,4-trifluoro-1-(*p*-tolyl)butan-1-one)

(4r<sup>2</sup>):

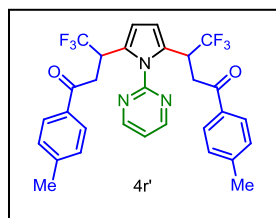

104 mg (90%); white solid; mp = 124.3–125.5 °C;  $^1\text{H}$  NMR (400 MHz,  $\text{CDCl}_3$ )  $\delta$  8.79 (d,  $J = 4.0$  Hz, 2H), 7.86 (d,  $J = 8.0$  Hz, 4H), 7.28–7.74 (m, 5H), 6.34 (s, 2H), 5.23–5.13 (m, 2H), 3.64 (dd,  $J = 17.6, 6.4$  Hz, 2H), 3.57 (dd,  $J = 17.6, 6.0$  Hz, 2H), 2.40 (s, 6H);  $^{13}\text{C}$  NMR (100 MHz,  $\text{CDCl}_3$ )  $\delta$  194.8, 158.7, 157.1, 144.2, 133.9, 129.3, 128.7, 128.2, 126.5 (q,  $J_{C-F} = 278.1$  Hz), 119.0, 110.0, 38.8, 36.5 (q,  $J_{C-F} = 28.1$  Hz), 21.6; IR (KBr)  $\nu$  3038, 2963, 2922, 2374, 1691, 1608, 1566, 1434, 1319, 1255, 1157, 1112, 977, 820, 734  $\text{cm}^{-1}$ ; HRMS (Q-TOF, ESI) calcd for  $\text{C}_{30}\text{H}_{26}\text{F}_6\text{N}_3\text{O}_2$   $[\text{M}+\text{H}]^+$  574.1924, found 574.1945.

### 4,4,4-trifluoro-3-(1-(pyrimidin-2-yl)indolin-7-yl)-1-(*p*-tolyl)butan-1-one (4s):

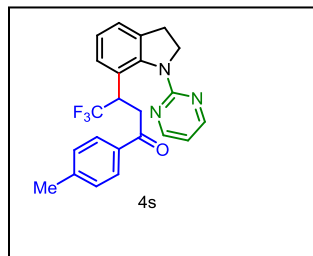

25 mg (30%); white solid; mp = 110.4–112.8 °C;  $^1\text{H}$  NMR (400 MHz,  $\text{CDCl}_3$ )  $\delta$  8.23 (d,  $J = 4.8$  Hz, 2H), 7.86 (d,  $J = 8.4$  Hz, 2H), 7.36 (d,  $J = 8.0$  Hz, 1H), 7.27–7.25 (m, 3H), 7.13 (t,  $J = 7.6$  Hz, 1H), 6.66 (t,  $J = 4.8$  Hz, 1H), 4.70–4.61 (m, 2H), 4.28–4.20 (m, 1H), 3.86 (dd,  $J = 17.2, 8.4$  Hz, 1H), 3.47 (dd,  $J = 17.2, 4.0$  Hz, 1H), 3.17–3.08 (m, 1H), 2.96–2.89 (m, 1H), 2.41 (s, 3H);  $^{13}\text{C}$  NMR (100 MHz,  $\text{CDCl}_3$ )  $\delta$  195.1, 161.1, 157.8, 144.0, 143.5, 135.9, 134.2, 129.3, 128.1, 127.1 (q,  $J_{C-F} = 279.1$  Hz), 128.8, 126.6, 124.7, 124.5, 112.6, 52.8, 40.6 (q,  $J_{C-F} = 26.6$  Hz), 38.9, 29.8, 21.6; IR (KBr)  $\nu$  3034, 2923, 2854, 1686, 1607, 1578, 1552, 1423, 1363, 1256, 1220, 1154, 1104, 1054, 969, 804, 753  $\text{cm}^{-1}$ ; HRMS (Q-TOF, ESI) calcd for  $\text{C}_{23}\text{H}_{21}\text{F}_3\text{N}_3\text{O}_2$   $[\text{M}+\text{H}]^+$  412.1631, found 412.1653.



**Typical procedure for migratory product (3aa, 3ac, 3ad, 3am, 3an, 3ia, 3ma, 3oa):** To an oven-dried sealed tube with 1-(pyrimidin-2-yl)-1*H*-indole (**1a**) (39 mg, 0.2 mmol, 100 mol %), (*E*)-4,4,4-trifluoro-1-(*p*-tolyl)but-2-en-1-one (**2a**) (42.8 mg, 0.2 mmol, 100 mol %), [RhCp\*Cl<sub>2</sub>]<sub>2</sub> (3.1 mg, 0.005 mmol, 2.5 mol %) and AgSbF<sub>6</sub> (6.9 mg, 0.02 mmol, 10 mol %) in THF (1 mL) was added AgOAc (16.6 mg, 0.01 mmol, 50 mol %). The reaction mixture was allowed to stir at 70 °C for 20 h. After cooling at room temperature, the reaction mixture was evaporated and the residue was purified by flash column chromatography (SiO<sub>2</sub>: *n*-hexanes/EtOAc = 4:1) provided **3a** (46 mg) in 56% and **3aa** (34 mg) in 42% yield.

**4,4,4-Trifluoro-3-(1*H*-indol-2-yl)-2-(pyrimidin-2-yl)-1-(*p*-tolyl)butan-1-one (3aa):**

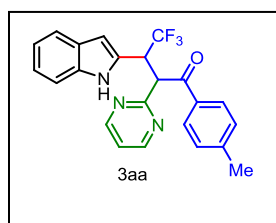

34 mg (42%); white solid; mp = 216.8–217.5 °C; <sup>1</sup>H NMR (400 MHz, CDCl<sub>3</sub>) δ 9.00 (br s, 1H), 8.42 (d, *J* = 4.8 Hz, 2H), 8.15 (d, *J* = 8.0 Hz, 2H), 7.42 (d, *J* = 7.6 Hz, 1H), 7.27 (t, *J* = 7.6 Hz, 3H), 7.08 (t, *J* = 7.2 Hz, 1H), 6.99 (d, *J* = 7.2 Hz, 1H), 6.82 (d, *J* = 4.8 Hz, 1H), 6.37 (s, 1H), 5.92 (d, *J* = 9.6 Hz, 1H), 5.37 (quint, *J* = 8.8 Hz, 1H), 2.39 (s, 3H); <sup>13</sup>C NMR (100 MHz, CDCl<sub>3</sub>) δ 193.8, 164.8, 157.2, 145.0, 135.8, 133.2, 129.6, 129.4, 127.8, 126.1 (q, *J*<sub>C-F</sub> = 279.0 Hz), 122.0, 120.4, 119.6, 119.2, 111.0, 103.8, 55.8, 44.7 (q, *J*<sub>C-F</sub> = 27.6 Hz), 21.7; IR (KBr) ν 3359, 3062, 2949, 1673, 1603, 1567, 1435, 1414, 1367, 1305, 1250, 1189, 1162, 1104, 977, 797, 724 cm<sup>-1</sup>; HRMS (Q-TOF, ESI) calcd for C<sub>23</sub>H<sub>19</sub>F<sub>3</sub>N<sub>3</sub>O [M+H]<sup>+</sup> 410.1475, found 410.1480.

**4,4,4-Trifluoro-3-(1*H*-indol-2-yl)-1-(4-methoxyphenyl)-2-(pyrimidin-2-yl)butan-1-one (3ac):**

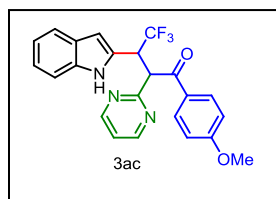

28 mg (33%); light yellow solid; mp = 226.1–227.4 °C; <sup>1</sup>H NMR (500 MHz, CDCl<sub>3</sub>) δ 8.63 (br s, 1H), 8.43 (d, *J* = 4.5 Hz, 2H), 8.19 (d, *J* = 9.0 Hz, 2H), 7.41 (d, *J* = 8.0 Hz, 1H), 7.27 (d, *J* = 9.0 Hz, 1H), 7.10 (t, *J* = 7.5 Hz, 1H), 6.99 (t, *J* = 8.0 Hz, 1H), 6.94 (d, *J* = 9.0 Hz, 2H), 6.86 (t, *J* = 5.0 Hz, 1H), 6.32 (s, 1H), 5.83 (d, *J* = 9.5 Hz, 1H), 5.27 (quint, *J* = 9.0 Hz, 1H), 3.86 (s, 3H); <sup>13</sup>C NMR (125 MHz, CDCl<sub>3</sub>) δ 191.3, 165.1, 164.1, 157.2, 135.8, 131.7, 129.4, 128.7, 127.8, 126.1 (q, *J*<sub>C-F</sub> = 279 Hz), 122.1, 120.4, 119.7, 119.2, 114.0, 110.8, 104.1, 55.7, 55.5, 44.6 (q, *J*<sub>C-F</sub> = 27.5 Hz); IR (KBr) ν 3348, 3061, 2924, 2848, 1667, 1597, 1567, 1513, 1457, 1414, 1350, 1330, 1254, 1158, 1096, 1026, 978, 827, 794, 727 cm<sup>-1</sup>; HRMS (Q-

TOF, ESI) calcd for C<sub>23</sub>H<sub>19</sub>F<sub>3</sub>N<sub>3</sub>O<sub>2</sub> [M+H]<sup>+</sup> 426.1424, found 426.1433.

**1-(4-Chlorophenyl)-4,4,4-trifluoro-3-(1H-indol-2-yl)-2-(pyrimidin-2-yl)butan-1-one (3ad):**

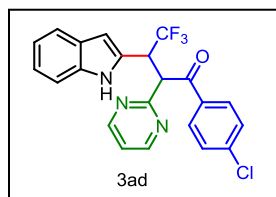

15 mg (17%); white orange solid; mp = 201.3–202.8 °C; <sup>1</sup>H NMR (400 MHz, CDCl<sub>3</sub>) δ 8.64 (br s, 1H), 8.44 (d, *J* = 4.8 Hz, 2H), 8.16 (d, *J* = 8.8 Hz, 2H), 7.45 (d, *J* = 8.4 Hz, 2H), 7.42 (d, *J* = 8.4 Hz, 1H), 7.26 (d, *J* = 7.6 Hz, 1H), 7.10 (t, *J* = 8.0 Hz, 1H), 7.00 (t, *J* = 7.6 Hz, 1H), 6.89 (t, *J* = 4.8 Hz, 1H), 6.33 (s, 1H), 5.83 (d, *J* = 9.6 Hz, 1H), 5.27 (quint, *J* = 8.8 Hz, 1H); <sup>13</sup>C NMR (100 MHz, CDCl<sub>3</sub>) δ 192.9, 164.5, 157.3, 140.5, 135.8, 134.0, 130.6, 129.2, 129.0, 127.7, 126.0 (q, *J*<sub>C-F</sub> = 278.9 Hz), 122.2, 120.5, 119.7, 119.4, 110.8, 104.2, 56.0, 44.6 (q, *J*<sub>C-F</sub> = 27.7 Hz); IR (KBr) ν 3370, 2957, 2919, 2870, 1680, 1568, 1457, 1379, 1251, 1156, 980 cm<sup>-1</sup>; HRMS (Q-TOF, ESI) calcd for C<sub>22</sub>H<sub>16</sub>ClF<sub>3</sub>N<sub>3</sub>O [M+H]<sup>+</sup> 430.0929, found 430.0931.

**4,4,4-Ttrifluoro-3-(1H-indol-2-yl)-1-(3-methoxyphenyl)-2-(pyrimidin-2-yl)butan-1-one (3am):**

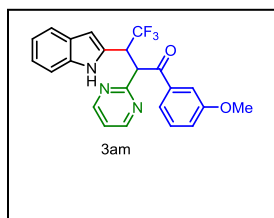

17 mg (20%); light yellow solid; mp = 178.3–181.1 °C; <sup>1</sup>H NMR (500 MHz, CDCl<sub>3</sub>) δ 8.62 (br s, 1H), 8.44 (d, *J* = 5.0 Hz, 2H), 7.81 (d, *J* = 7.5 Hz, 1H), 7.68 (t, *J* = 2.0 Hz, 1H), 7.41 (d, *J* = 8.0 Hz, 1H), 7.37 (d, *J* = 8.0 Hz, 1H), 7.27 (d, *J* = 8.5 Hz, 1H), 7.12–7.08 (m, 2H), 6.99 (t, *J* = 7.0 Hz, 1H), 6.87 (t, *J* = 5.0 Hz, 1H), 6.32 (s, 1H), 5.85 (d, *J* = 9.5 Hz, 1H), 5.26 (quint, *J* = 9.0 Hz, 1H), 3.84 (s, 3H); <sup>13</sup>C NMR (125 MHz, CDCl<sub>3</sub>) δ 193.7, 164.8, 160.0, 157.2, 137.1, 135.8, 129.8, 129.1, 127.8, 126.0 (q, *J*<sub>C-F</sub> = 279.2 Hz), 122.1, 121.9, 120.7, 120.5, 119.7, 119.3, 113.1, 110.8, 104.3, 56.1, 55.5, 44.6 (q, *J*<sub>C-F</sub> = 27.6 Hz); IR (KBr) ν 3362, 3055, 3014, 2925, 1854, 1677, 1598, 1566, 1458, 1413, 1363, 1309, 1262, 1160, 1102, 1042, 1012, 866, 796, 722, 680 cm<sup>-1</sup>; HRMS (Q-TOF, ESI) calcd for C<sub>23</sub>H<sub>19</sub>F<sub>3</sub>N<sub>3</sub>O<sub>2</sub> [M+H]<sup>+</sup> 426.1424, found 426.1432.

**1-(3-Chlorophenyl)-4,4,4-trifluoro-3-(1H-indol-2-yl)-2-(pyrimidin-2-yl)butan-1-one (3an):**

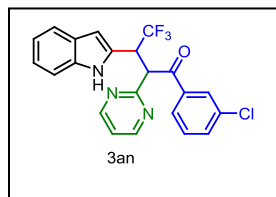

10 mg (12%); white solid; mp = 218.8–220.5 °C; <sup>1</sup>H NMR (500 MHz, CDCl<sub>3</sub>) δ 8.45 (d, *J* = 5.0 Hz, 2H), 8.39 (br s, 1H), 8.15 (t, *J* = 2.0 Hz, 1H), 8.07 (d, *J* = 8.0 Hz, 1H), 7.55–7.53 (m, 1H), 7.43–7.40 (m, 2H), 7.27 (d, *J* = 11.0 Hz, 1H), 7.13–7.09 (m, 1H), 7.02–6.99 (m, 1H), 6.90 (t, *J* =

5.0 Hz, 1H), 6.31 (s, 1H), 5.78 (d,  $J = 9.5$  Hz, 1H), 5.20 (quint,  $J = 9.0$  Hz, 1H);  $^{13}\text{C}$  NMR (125 MHz,  $\text{CDCl}_3$ )  $\delta$  192.7, 164.4, 157.3, 137.3, 135.2, 133.7, 130.1, 129.2, 127.7, 127.2, 126.1 (q,  $J_{\text{C-F}} = 278.1$  Hz), 122.3, 120.5, 119.8, 119.4, 119.4, 110.8, 104.5, 102.0, 56.1, 44.6 (q,  $J_{\text{C-F}} = 28.2$  Hz); IR (KBr)  $\nu$  3308, 3216, 2961, 2924, 2853, 1694, 1568, 1416, 1416, 1372, 1254, 1160, 1106, 815, 746, 715  $\text{cm}^{-1}$ ; HRMS (Q-TOF, ESI) calcd for  $\text{C}_{22}\text{H}_{16}\text{ClF}_3\text{N}_3\text{O}$   $[\text{M}+\text{H}]^+$  430.0929, found 430.0936.

**4,4,4-Trifluoro-3-(5-fluoro-1*H*-indol-2-yl)-2-(pyrimidin-2-yl)-1-(*p*-tolyl)butan-1-one (3ia):**

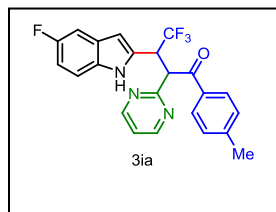

22 mg (26%); light yellow solid; mp = 223.5–225.1 °C;  $^1\text{H}$  NMR (400 MHz,  $\text{CDCl}_3$ )  $\delta$  8.96 (br s, 1H), 8.45 (d,  $J = 4.8$  Hz, 2H), 8.11 (d,  $J = 8.4$  Hz, 2H), 7.28 (d,  $J = 8.0$  Hz, 2H), 7.18 (dd,  $J = 8.8, 4.4$  Hz, 1H), 7.05 (dd,  $J = 9.6, 2.4$  Hz, 1H), 6.89 (t,  $J = 4.8$  Hz, 1H), 6.87 (td,  $J = 9.2, 2.4$  Hz, 1H), 6.29 (s, 1H), 5.87 (d,  $J = 9.2$  Hz, 1H), 5.30 (quint,  $J = 8.8$  Hz, 1H), 2.40 (s, 3H);  $^{13}\text{C}$  NMR (100 MHz,  $\text{CDCl}_3$ )  $\delta$  193.7, 164.8, 157.8 (d,  $J_{\text{C-F}} = 232.8$  Hz), 157.2, 141.1, 133.1, 132.3, 131.1, 129.6, 129.4, 128.0 (d,  $J_{\text{C-F}} = 10.3$  Hz), 127.7, 126.0 (q,  $J_{\text{C-F}} = 279$  Hz), 119.3, 111.5 (d,  $J_{\text{C-F}} = 9.7$  Hz), 110.5 (d,  $J_{\text{C-F}} = 26.3$  Hz), 105.1 (d,  $J_{\text{C-F}} = 23.3$  Hz), 103.9, 55.8, 44.6 (q,  $J_{\text{C-F}} = 27.6$  Hz); IR (KBr)  $\nu$  3359, 1677, 1603, 1566, 1492, 1452, 1413, 1361, 1305, 1248, 1170, 1104, 979, 857, 818, 785  $\text{cm}^{-1}$ ; HRMS (Q-TOF, ESI) calcd for  $\text{C}_{23}\text{H}_{18}\text{F}_4\text{N}_3\text{O}$   $[\text{M}+\text{H}]^+$  428.1381, found 428.1389.

**3-(6-Chloro-1*H*-indol-2-yl)-4,4,4-trifluoro-2-(pyrimidin-2-yl)-1-(*p*-tolyl)butan-1-one (3ma):**

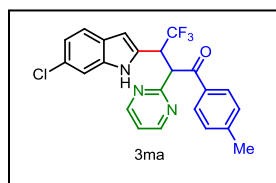

22 mg (25%); white solid; mp = 224.7–227.5 °C;  $^1\text{H}$  NMR (400 MHz,  $\text{CDCl}_3$ )  $\delta$  8.81 (br s, 1H), 8.45 (d,  $J = 4.8$  Hz, 2H), 8.09 (d,  $J = 8.4$  Hz, 2H), 7.32–7.27 (m, 4H), 6.96 (dd,  $J = 8.4, 2.0$  Hz, 1H), 6.90 (t,  $J = 4.8$  Hz, 1H), 6.29 (s, 1H), 5.84 (d,  $J = 9.2$  Hz, 1H), 5.25 (quint,  $J = 8.8$  Hz, 1H), 2.40 (s, 3H);  $^{13}\text{C}$  NMR (100 MHz,  $\text{CDCl}_3$ )  $\delta$  193.5, 164.8, 157.3, 145.1, 136.0, 133.1, 130.1, 129.6, 129.4, 127.9, 126.3, 125.9 (q,  $J_{\text{C-F}} = 278.9$  Hz), 121.3, 120.5, 119.3, 110.8, 104.0, 55.8, 44.5 (q,  $J_{\text{C-F}} = 27.8$  Hz), 21.7; IR (KBr)  $\nu$  3452, 3066, 2926, 1679, 1605, 1570, 1412, 1242, 1173, 1122, 976, 923, 810, 725  $\text{cm}^{-1}$ ; HRMS (Q-TOF, ESI) calcd for  $\text{C}_{23}\text{H}_{18}\text{ClF}_3\text{N}_3\text{O}$   $[\text{M}+\text{H}]^+$  444.1085, found 444.1108.

**2-(1,1,1-Trifluoro-4-oxo-3-(pyrimidin-2-yl)-4-(*p*-tolyl)butan-2-yl)-1,3a,5,6,7,7a-hexahydro-4*H*-indol-4-one (3oa):**

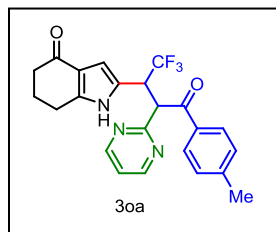

25 mg (29%); white solid; mp = 233.2–235.3 °C; <sup>1</sup>H NMR (400 MHz, CDCl<sub>3</sub>) δ 9.71 (br s, 1H), 8.68 (d, *J* = 4.8 Hz, 2H), 7.95 (d, *J* = 8.0 Hz, 2H), 7.19 (d, *J* = 8.4 Hz, 2H), 7.16 (t, *J* = 5.2 Hz, 1H), 6.48 (d, *J* = 2.4 Hz, 1H), 5.79 (d, *J* = 10.0 Hz, 1H), 4.84 (quint, *J* = 8.4 Hz, 1H), 2.78–2.71 (m, 2 H), 2.42–2.39 (m, 2 H), 2.35 (s, 3H), 2.08 (quint, *J* = 6.4 Hz, 2H);

<sup>13</sup>C NMR (100 MHz, CDCl<sub>3</sub>) δ 194.5, 194.0, 165.2, 157.7, 145.2, 144.0, 133.1, 129.5, 129.3, 125.8 (q, *J*<sub>C-F</sub> = 279 Hz), 125.0, 120.7, 119.7, 105.5, 57.0, 45.2 (q, *J*<sub>C-F</sub> = 27.8 Hz), 37.6, 23.7, 22.6, 21.7; IR (KBr) ν 3451, 2948, 2874, 1675, 1568, 1423, 1263, 1154, 1115, 993, 831, 578 cm<sup>-1</sup>; HRMS (Q-TOF, ESI) calcd for C<sub>23</sub>H<sub>21</sub>F<sub>3</sub>N<sub>3</sub>O<sub>2</sub> [M+H]<sup>+</sup> 428.1580, found 428.1601.

## Optimization table for 5a and 6a:

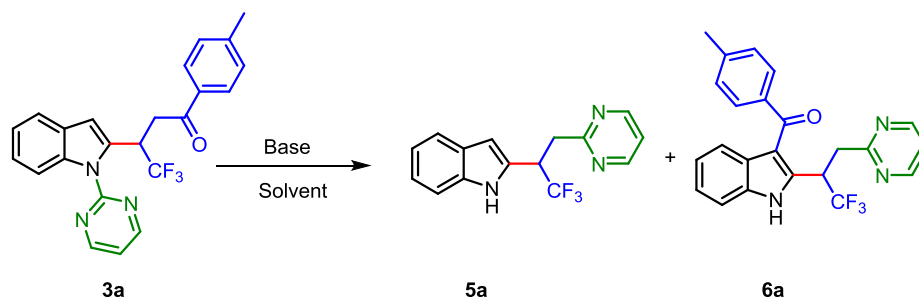

| Entry          | Base (mol%)                             | Solvent | Condition    | Yield (%) <sup>b</sup> |              |
|----------------|-----------------------------------------|---------|--------------|------------------------|--------------|
|                |                                         |         |              | <b>5a</b>              | <b>6a</b>    |
| 1              | K <sub>2</sub> CO <sub>3</sub> (100)    | DCE     | 120 °C, 12 h | Not observed           | Not observed |
| 2              | K <sub>2</sub> CO <sub>3</sub> (100)    | THF     | 120 °C, 12 h | Not observed           | Not observed |
| 3              | K <sub>2</sub> CO <sub>3</sub> (100)    | TFE     | RT, 12 h     | Not observed           | Not observed |
| 4              | BF <sub>3</sub> .OEt <sub>2</sub> (100) | TFE     | 120 °C, 15 h | Trace                  | Not observed |
| 5              | K <sub>2</sub> CO <sub>3</sub> (100)    | TFE     | 70 °C, 12 h  | Trace                  | Trace        |
| 6              | K <sub>2</sub> CO <sub>3</sub> (200)    | TFE     | 100 °C, 12 h | 55                     | 18           |
| 7 <sup>c</sup> | K <sub>2</sub> CO <sub>3</sub> (200)    | TFE     | 120 °C, 4 h  | 66                     | 23           |
| 8              | KtOBu (200)                             | TFE     | 120 °C, 4 h  | 60                     | 20           |
| 9              | NaOMe (200)                             | TFE     | 120 °C, 4 h  | 58                     | 19           |
| 10             | NaOMe (200)                             | THF     | 70 °C, 12 h  | 65                     | Not observed |
| 11             | KtOBu (200)                             | THF     | 70 °C, 12 h  | 68                     | Not observed |
| 12             | NaOMe (100)                             | DMSO    | 115 °C, 3 h  | trace                  | Not observed |
| 13             | Cs <sub>2</sub> CO <sub>3</sub> (200)   | TFE     | 120 °C, 4 h  | 44                     | 25           |
| 14             | DBU (200)                               | TFE     | 120 °C, 4 h  | 47                     | 24           |

<sup>a</sup>Reaction conditions: **3a** (0.1 mmol). <sup>b</sup>Isolated yield. <sup>c</sup>**3a** (0.24 mmol).

**General Procedure for the Synthesis of 5 and 6:** To an oven-dried sealed tube with **3a** (100 mg, 0.24 mmol, 100 mol %) in TFE (1 mL) was added K<sub>2</sub>CO<sub>3</sub> (49.7 mg, 0.36 mmol, 150 mol %). The reaction mixture was allowed to stir at 120 °C for 4 h. After complete disappearance of **3a** on TLC, the reaction mixture was cooled at room temperature and quenched with water. The compound was extracted with Ethyl acetate and dried over Na<sub>2</sub>SO<sub>4</sub>. The organic layer was

evaporated and the residue was purified by flash column chromatography (SiO<sub>2</sub>: *n*-hexanes/EtOAc = 2:1 to 1:1) provided compound **5a** and **6a**.

**2-(1,1,1-Trifluoro-3-(pyrimidin-2-yl)propan-2-yl)-1H-indole (5a):**

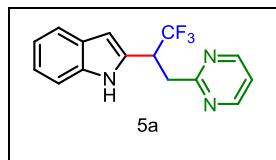

46 mg (66%); white solid; mp = 162.0–162.5 °C; <sup>1</sup>H NMR (400 MHz, CDCl<sub>3</sub>) δ 8.83 (br s, 1H), 8.60 (d, *J* = 3.6 Hz, 2H), 7.51 (d, *J* = 7.2 Hz, 1H), 7.23 (s, 1H), 7.14–7.03 (m, 3H), 6.47 (s, 1H), 4.57 (s, 1H), 3.77–3.62 (m, 2H); <sup>13</sup>C NMR (100 MHz, CDCl<sub>3</sub>) δ 166.8, 157.1, 136.2, 131.0, 127.8, 126.3 (q, *J*<sub>C-F</sub> = 278.6 Hz), 122.2, 120.5, 119.9, 119.2, 110.8, 103.3, 42.4 (q, *J*<sub>C-F</sub> = 28.4 Hz), 37.7; IR (KBr) ν 3249, 3051, 2941, 1568, 1429, 1260, 1154, 1098, 1007, 933, 887, 789, 742, 684, 640 cm<sup>-1</sup>; HRMS (Q-TOF, ESI) calcd for C<sub>15</sub>H<sub>13</sub>F<sub>3</sub>N<sub>3</sub> [M+H]<sup>+</sup> 292.1056, found 292.1057.

***p*-Tolyl(2-(1,1,1-trifluoro-3-(pyrimidin-2-yl)propan-2-yl)-1H-indol-3-yl)methanone (6a):**

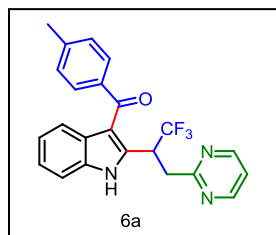

23 mg (23%); light yellow solid; mp = 209.5–211.9 °C; <sup>1</sup>H NMR (400 MHz, CDCl<sub>3</sub>) δ 10.67 (br s, 1H), 8.53 (d, *J* = 4.8 Hz, 2H), 7.60 (d, *J* = 8.0 Hz, 2H), 7.23 (d, *J* = 7.6 Hz, 3H), 7.15–7.08 (m, 3H), 7.00 (t, *J* = 7.6 Hz, 1H), 5.56–5.46 (m, 1H), 3.78 (dd, *J* = 15.2, 4.4 Hz, 1H), 3.69 (dd, *J* = 15.2, 10.8 Hz, 1H), 2.45 (s, 3H); <sup>13</sup>C NMR (100 MHz, CDCl<sub>3</sub>) δ 192.3, 166.2, 157.2, 142.9, 137.4, 136.0, 135.4, 129.7, 128.9, 126.5, 126.3 (q, *J*<sub>C-F</sub> = 279.2 Hz), 123.1, 121.3, 121.2, 119.4, 117.6, 111.3, 40.0 (q, *J*<sub>C-F</sub> = 28.3 Hz), 38.0, 21.7; IR (KBr) ν 3657, 3141, 3063, 2961, 2925, 1745, 1635, 1570, 1496, 1451, 1350, 1258, 1225, 1176, 1103, 1040, 910, 828, 749 cm<sup>-1</sup>; HRMS (Q-TOF, ESI) calcd for C<sub>23</sub>H<sub>19</sub>F<sub>3</sub>N<sub>3</sub>O [M+H]<sup>+</sup> 410.1475, found 410.1477.

**(4-Bromophenyl)(2-(1,1,1-trifluoro-3-(pyrimidin-2-yl)propan-2-yl)-1H-indol-3-yl)methanone (6e):**

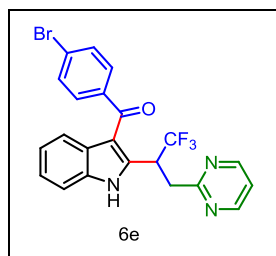

38 mg (38%); white solid; mp = 231.3–233.8 °C; <sup>1</sup>H NMR (400 MHz, CDCl<sub>3</sub>) δ 10.50 (br s, 1H), 8.55 (d, *J* = 4.8 Hz, 2H), 7.58 (s, 4H), 7.31 (d, *J* = 8.0 Hz, 1H), 7.18 (t, *J* = 6.8 Hz, 1H), 7.17 (t, *J* = 4.8 Hz, 1H), 7.08–7.01 (m, 2H), 5.54–5.44 (m, 1H), 3.78 (dd, *J* = 15.2, 4.4 Hz, 1H), 3.68 (dd, *J* = 15.2, 10.8 Hz, 1H); <sup>13</sup>C NMR (100 MHz, CDCl<sub>3</sub>) δ 191.4, 166.1,

157.2, 138.8, 136.6, 135.3, 131.6, 131.1, 127.2, 126.2, 126.2 (q,  $J_{C-F} = 279.1$  Hz), 123.4, 121.6, 121.1, 119.4, 116.8, 111.5, 39.9 (q,  $J_{C-F} = 28.4$  Hz), 38.0; IR (KBr)  $\nu$  3452, 3064, 2978, 2929, 1633, 1570, 1495, 1450, 1349, 1260, 1219, 1162, 1104, 1010, 908, 840, 747  $\text{cm}^{-1}$ ; HRMS (Q-TOF, ESI) calcd for  $\text{C}_{22}\text{H}_{16}\text{BrF}_3\text{N}_3\text{O}$   $[\text{M}+\text{H}]^+$  474.0423, found 474.0448.

**Procedure for the Synthesis of 7a:** To an oven-dried sealed tube with **3aa** (41 mg, 0.1 mmol, 100 mol %) in toluene (1 mL) was added *p*-toluenesulfonic acid monohydrate (3.8 mg, 0.02 mmol, 20 mol %). The reaction mixture was allowed to stir at 70 °C for 2 h. After complete disappearance of **3aa** on TLC, the reaction mixture was cooled at room temperature and quenched with water. The compound was extracted with ethyl acetate and dried over  $\text{Na}_2\text{SO}_4$ . The organic layer was evaporated and the residue was purified by flash column chromatography ( $\text{SiO}_2$ : *n*-hexanes/EtOAc = 2:1 to 1:1) provided compound **7a**.

**2-(Pyrimidin-2-yl)-3-(*p*-tolyl)-1-(trifluoromethyl)-9*H*-pyrrolo[1,2-*a*]indole (7a):**

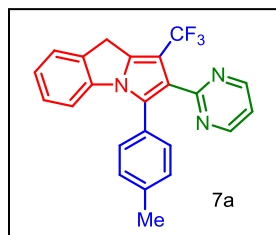

31 mg (79%); light yellow solid; mp = 147.7–148.0 °C;  $^1\text{H}$  NMR (500 MHz,  $\text{CDCl}_3$ )  $\delta$  8.62 (d,  $J = 5.0$  Hz, 2H), 7.45 (d,  $J = 7.5$  Hz, 1H), 7.35 (d,  $J = 8.0$  Hz, 2H), 7.21 (d,  $J = 8.0$  Hz, 2H), 7.14–7.11 (m, 1H), 7.10–7.07 (m, 1H), 7.03 (t,  $J = 5.0$  Hz, 1H), 6.68 (d,  $J = 7.5$  Hz, 1H), 4.09 (d,  $J = 2.0$  Hz, 2H), 2.43 (s, 3H);  $^{13}\text{C}$  NMR (125 MHz,  $\text{CDCl}_3$ )  $\delta$  162.5, 156.6, 140.6, 138.4, 136.5, 134.5, 130.9, 129.1, 128.9, 127.9, 127.4, 126.3 (q,  $J_{C-F} = 278.1$  Hz), 125.8, 124.4, 123.2, 123.1, 118.1, 112.7, 29.7, 21.5; IR (KBr)  $\nu$  2924, 2854, 1742, 1552, 1478, 1452, 1402, 1366, 1334, 1262, 1176, 1107, 1038, 821, 792, 752  $\text{cm}^{-1}$ ; HRMS (Q-TOF, ESI) calcd for  $\text{C}_{23}\text{H}_{17}\text{F}_3\text{N}_3$   $[\text{M}+\text{H}]^+$  392.369, found 392.1391.

# <sup>1</sup>H and <sup>13</sup>C NMR of all compounds

SpinWorks 4: BBC-450-A

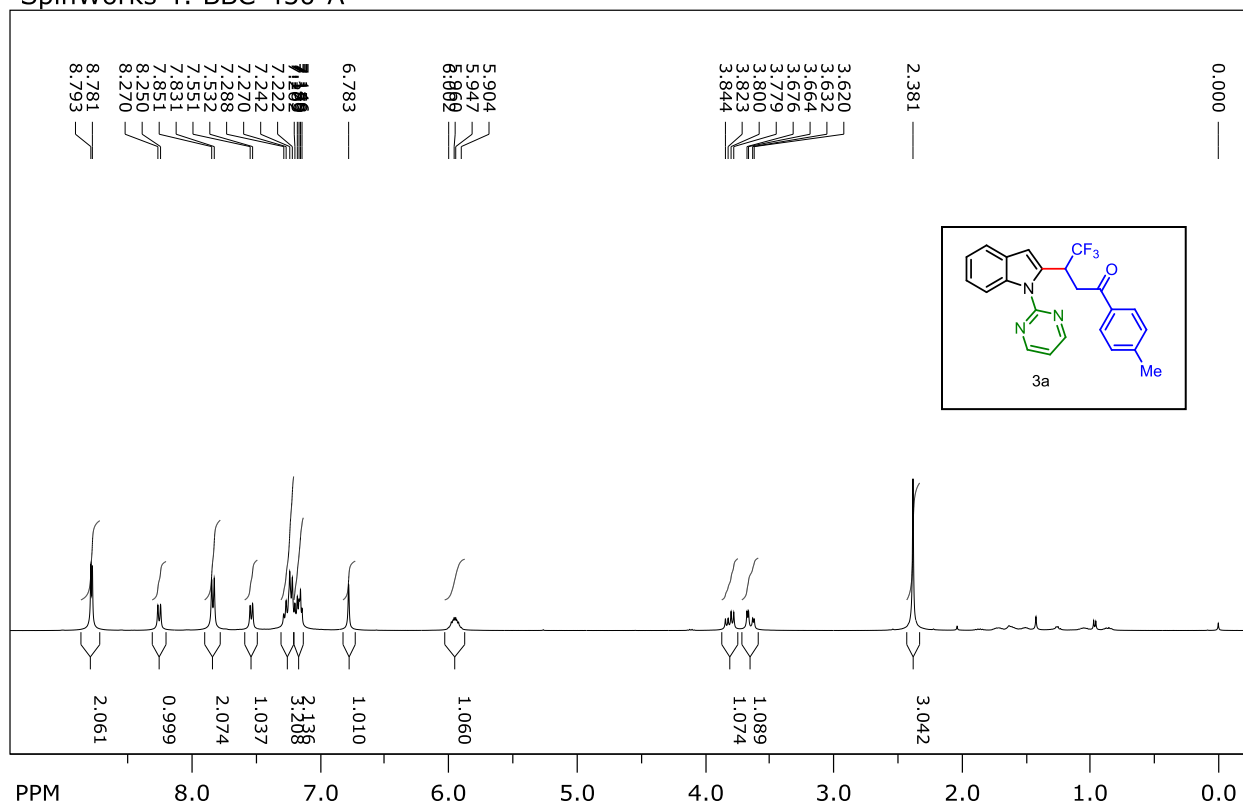

SpinWorks 4: BBC-450-A

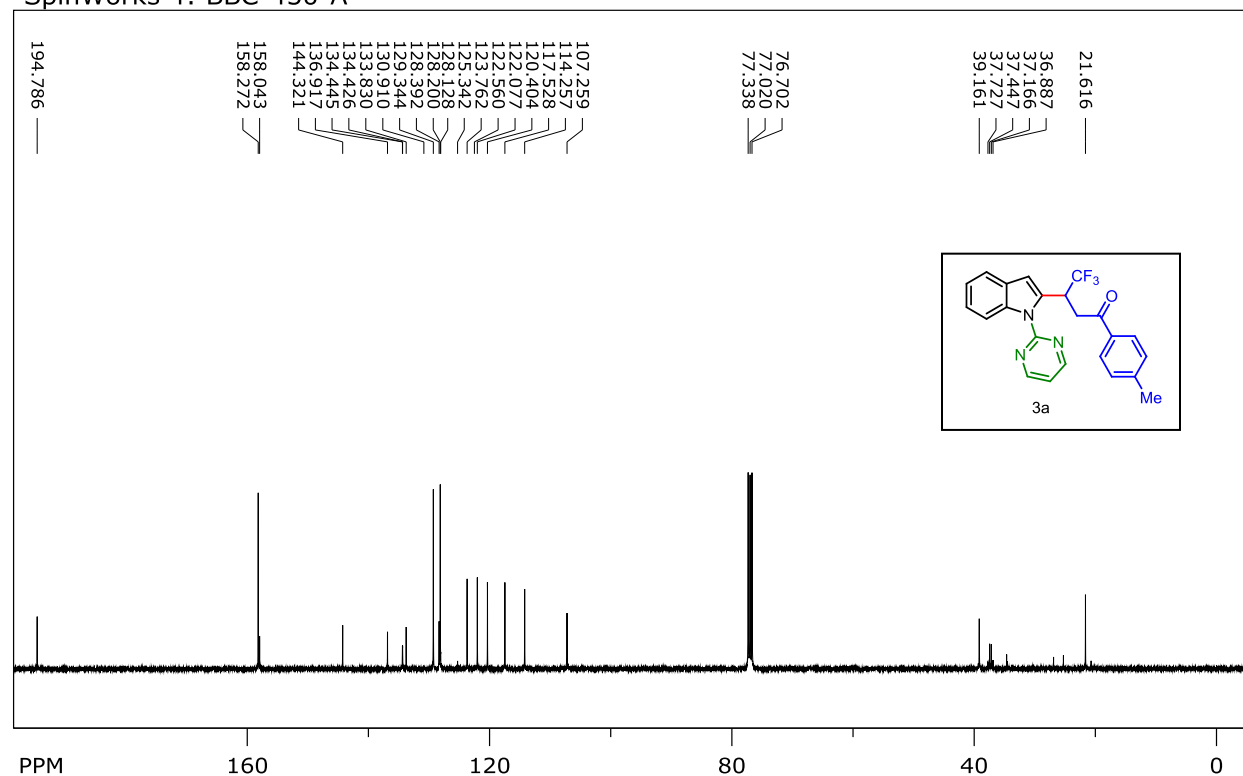



SpinWorks 4: BBC-489

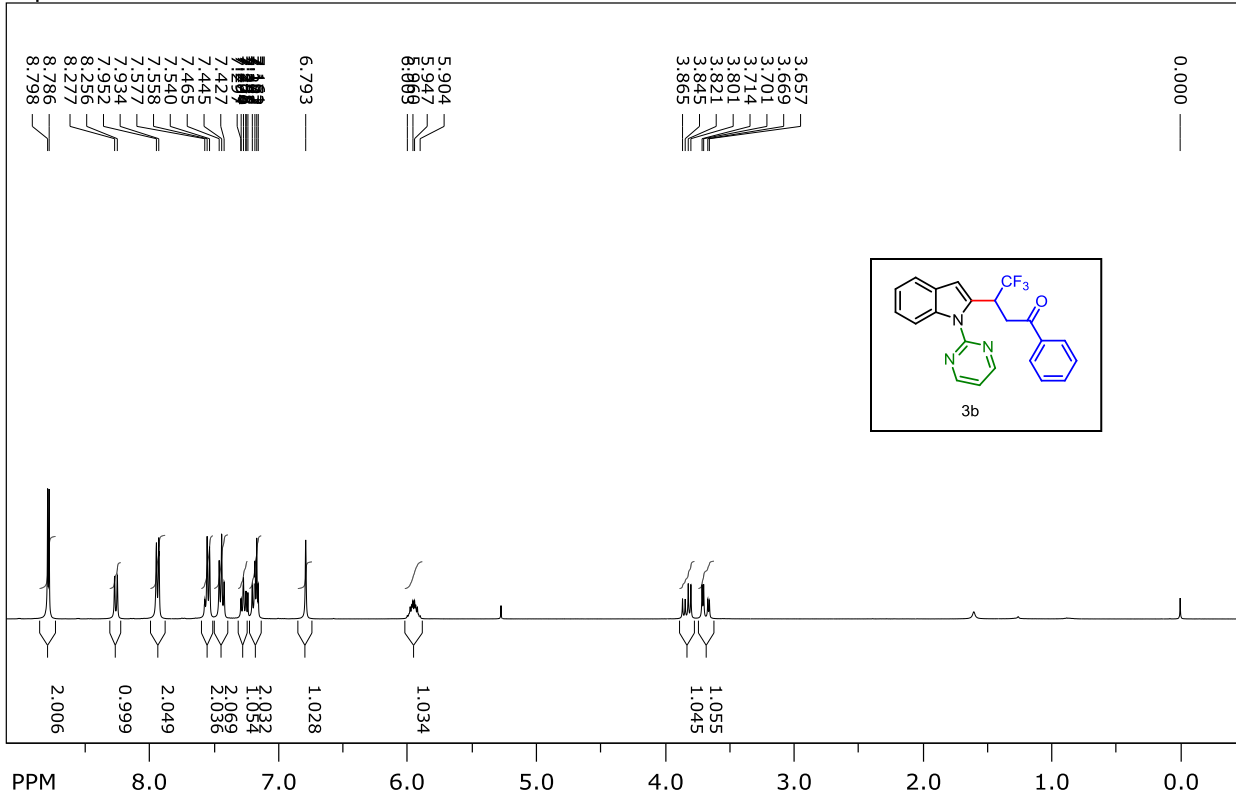

SpinWorks 4: BBC-489

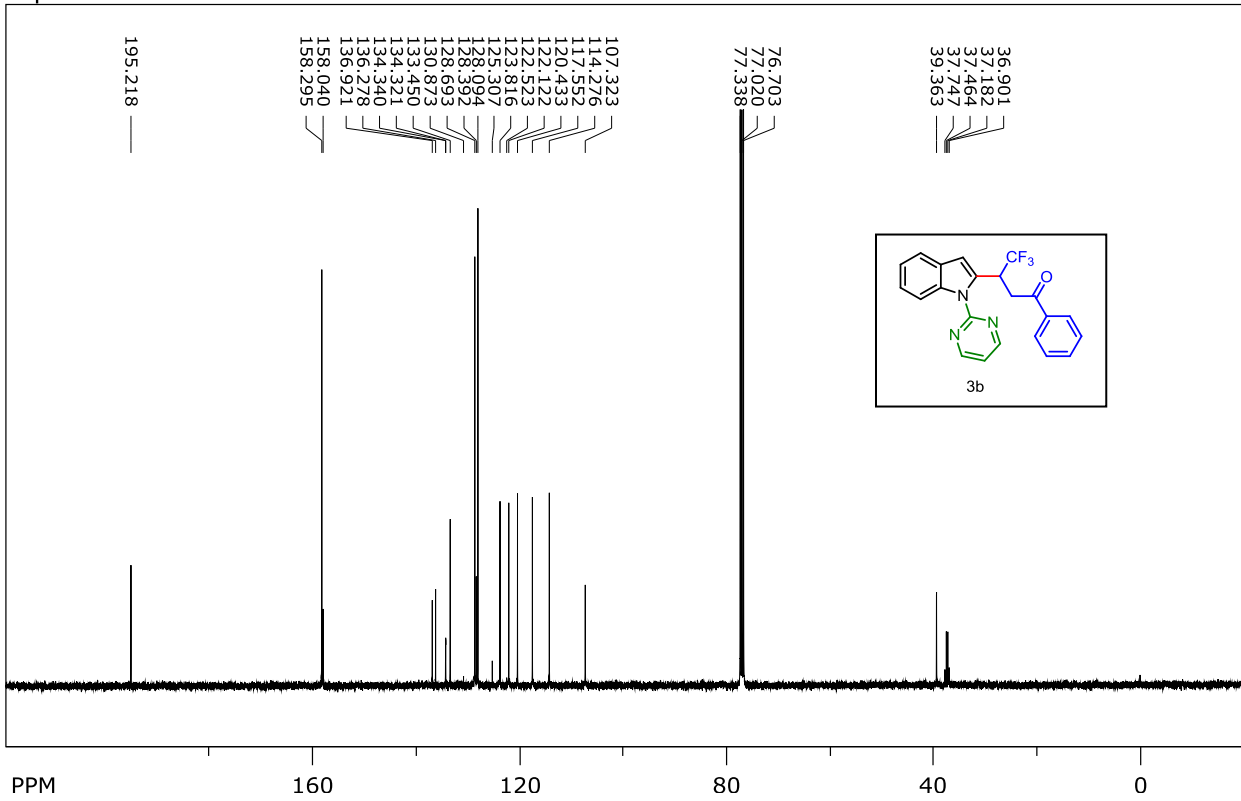

SpinWorks 4: BBC-488

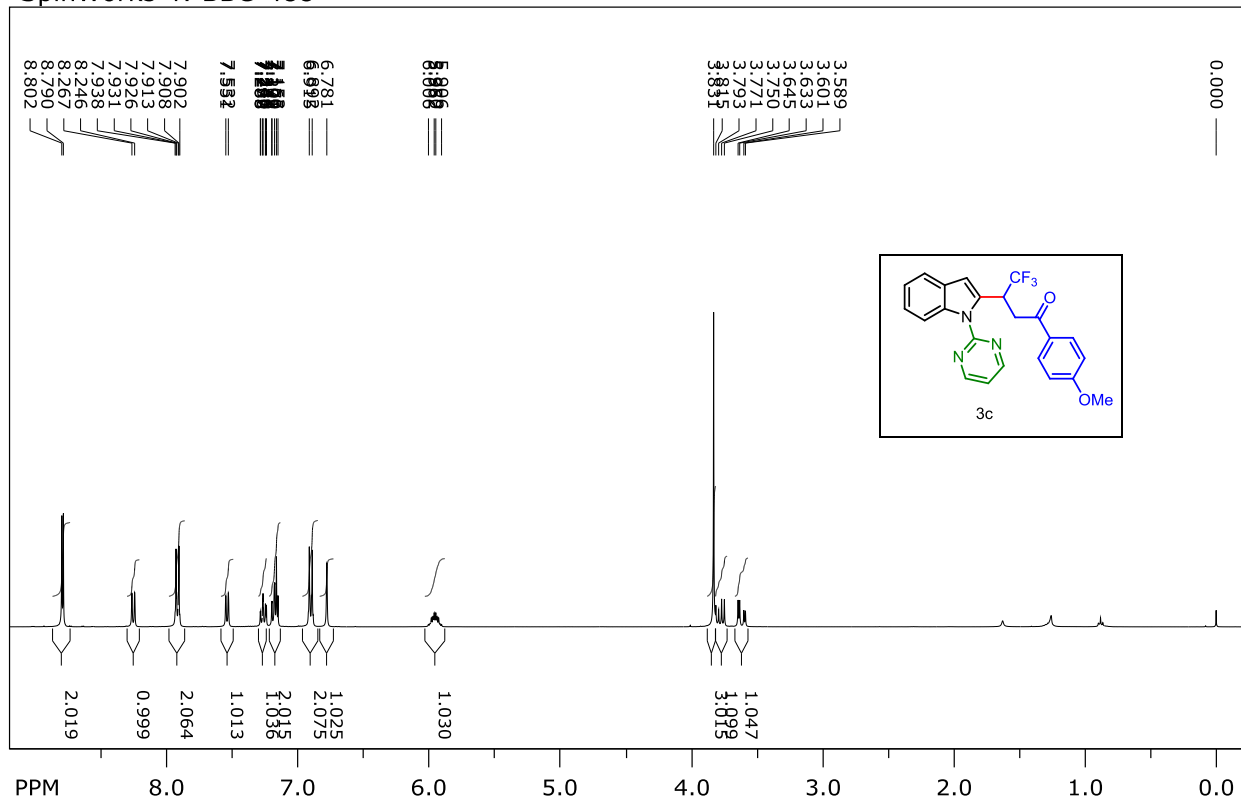

SpinWorks 4: BBC-488

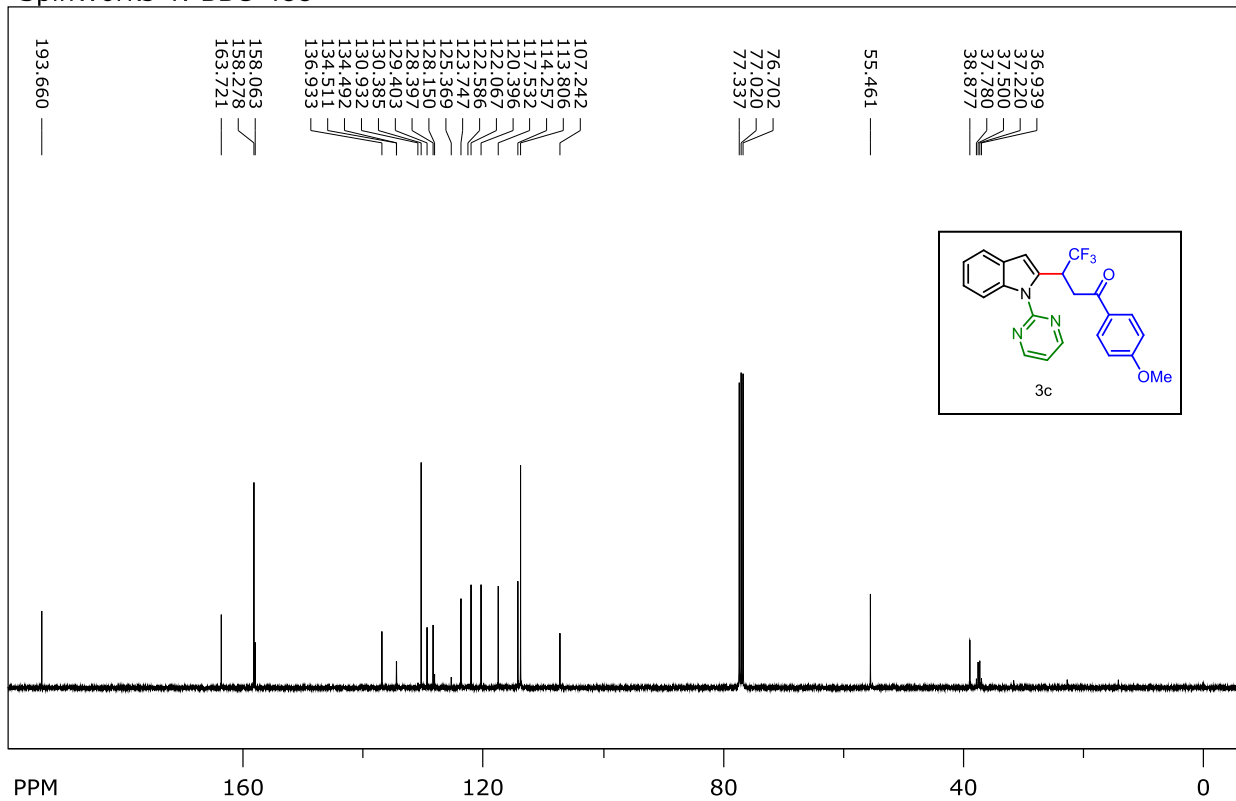

SpinWorks 4: BBC-487

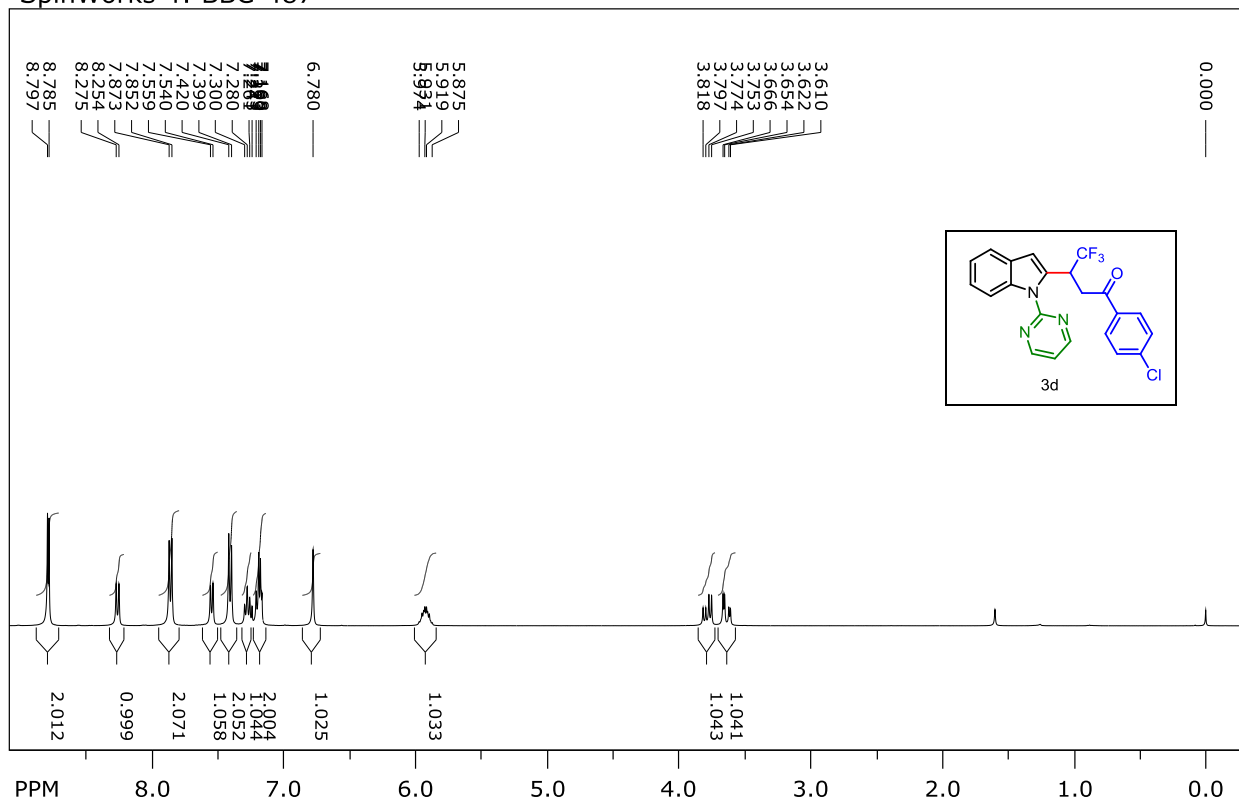

SpinWorks 4: BBC-487

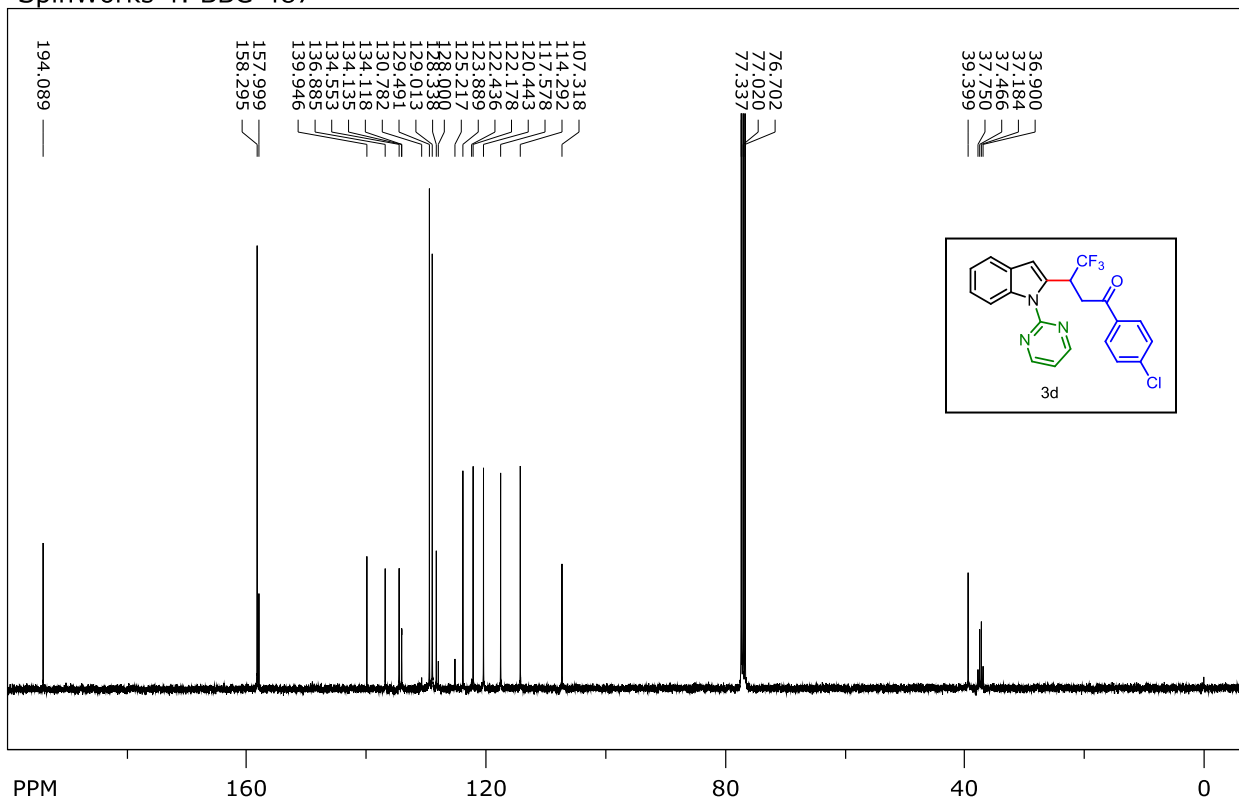

SpinWorks 4: BBC-486

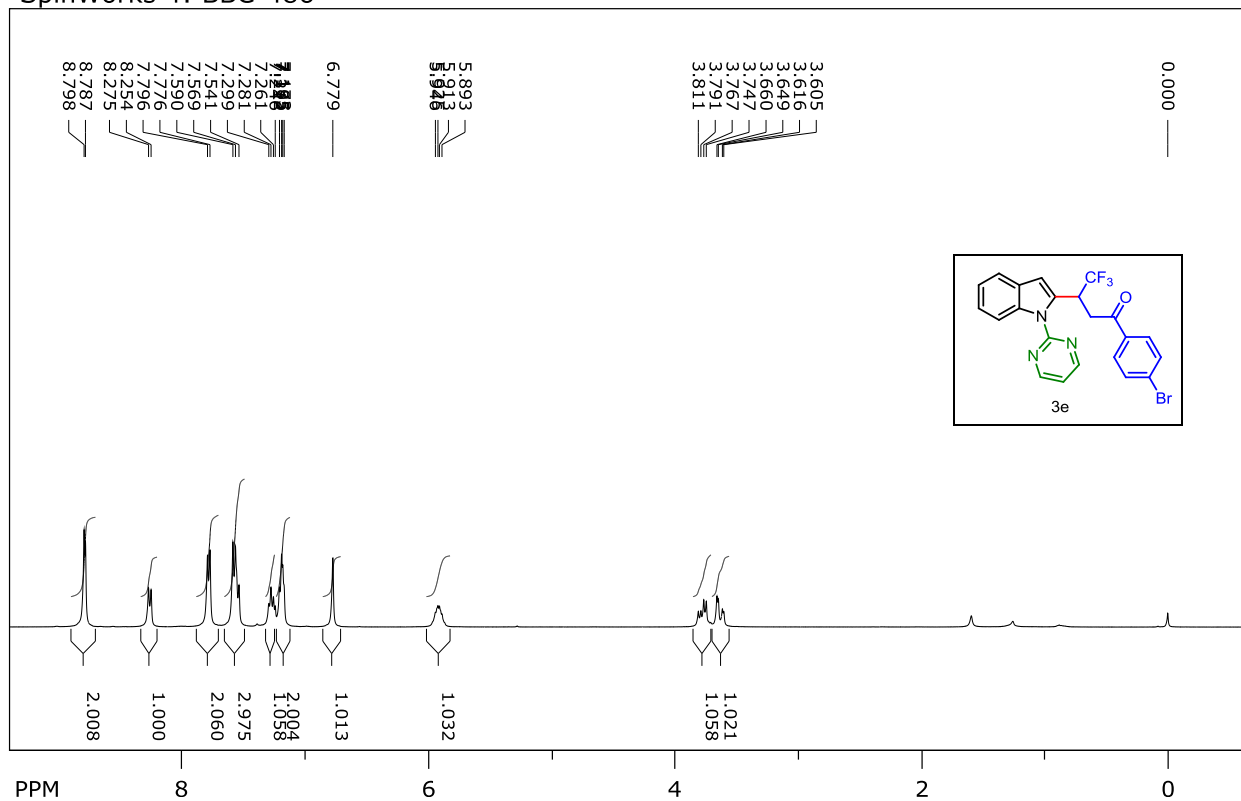

SpinWorks 4: BBC-486

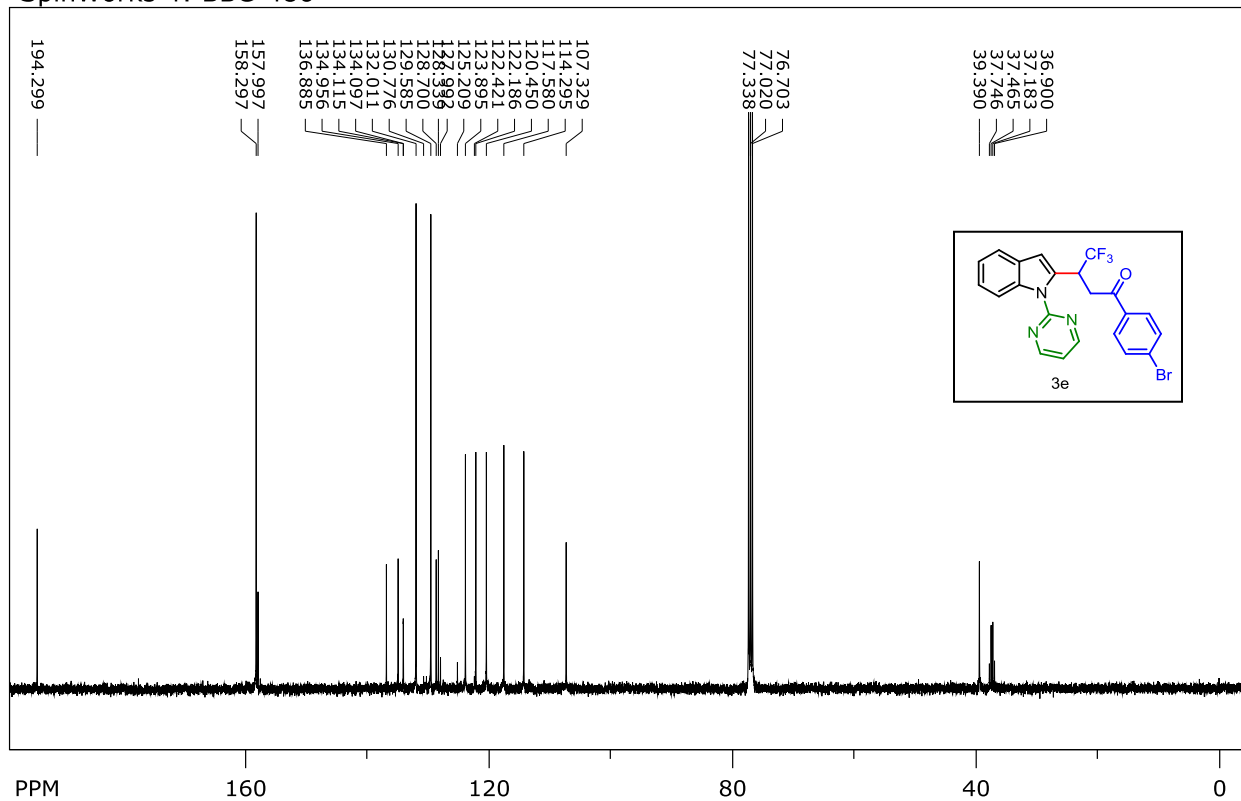

SpinWorks 4: BBC-490

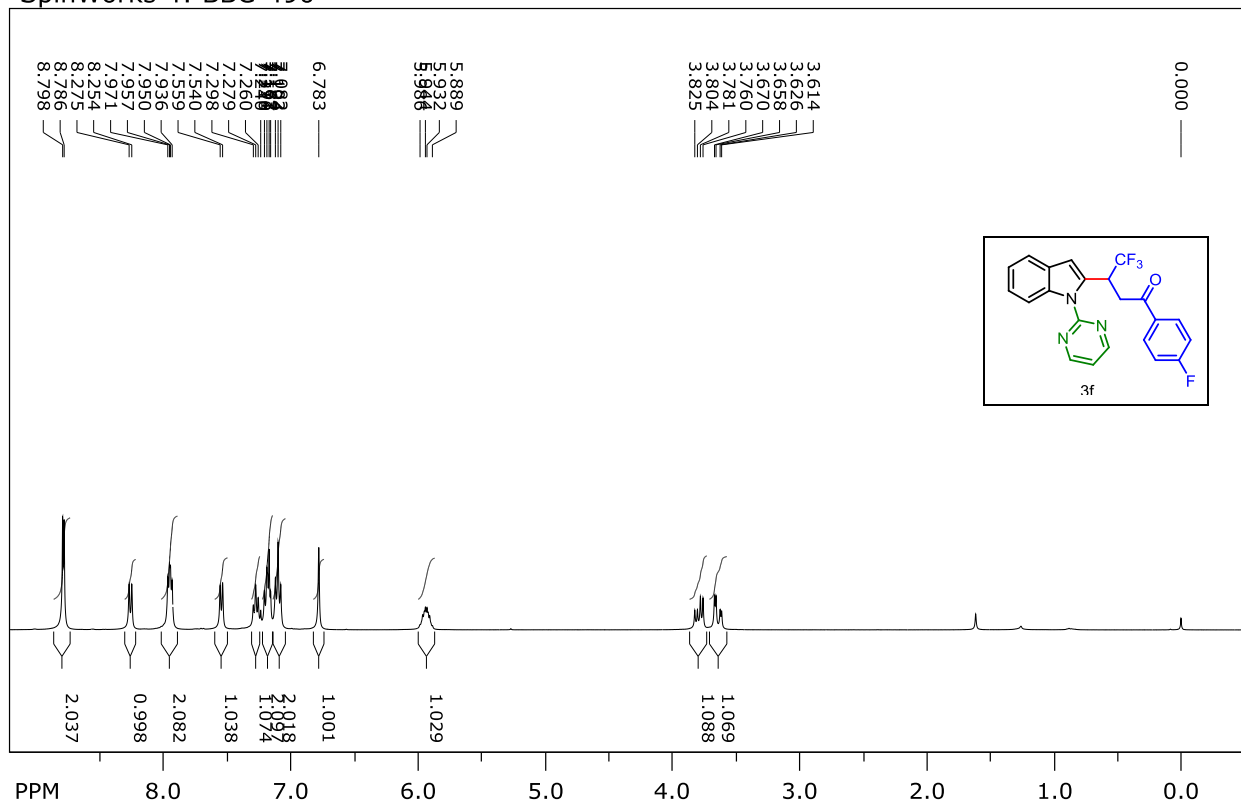

SpinWorks 4: BBC-490

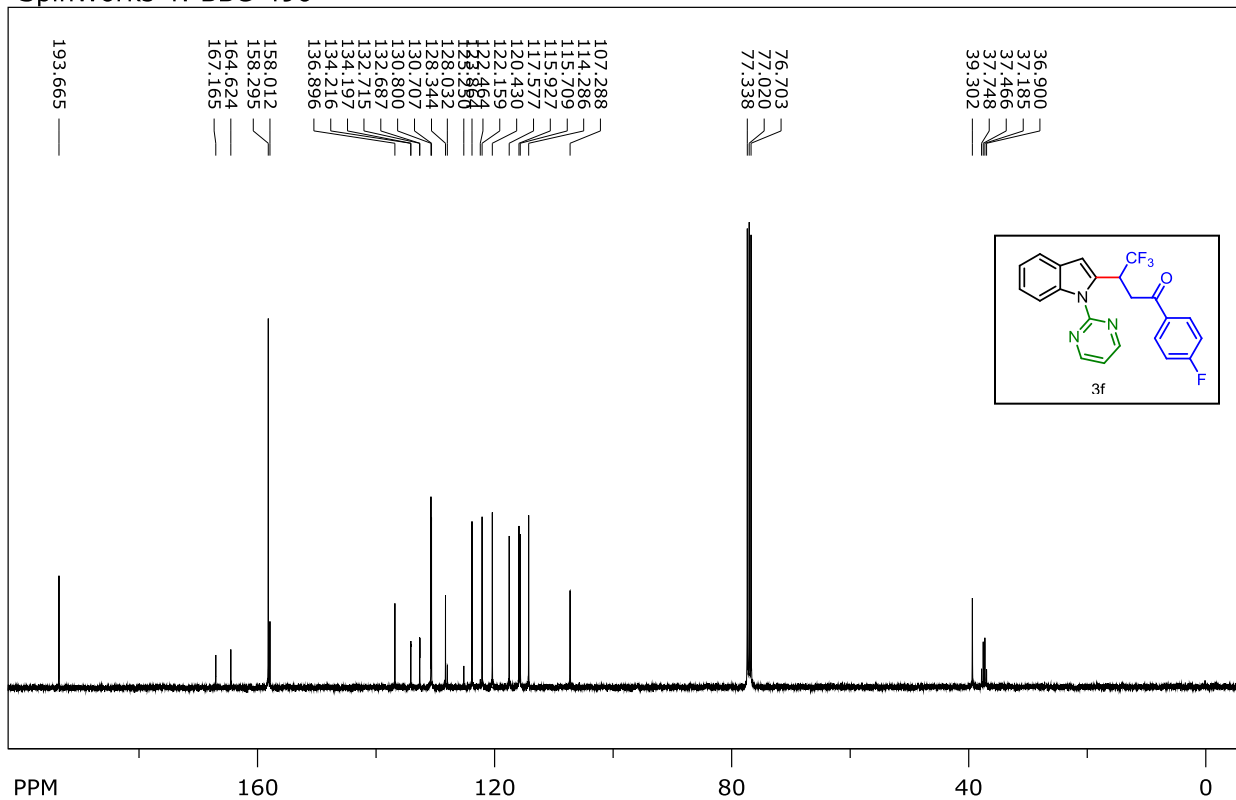

SpinWorks 4: BBC-491

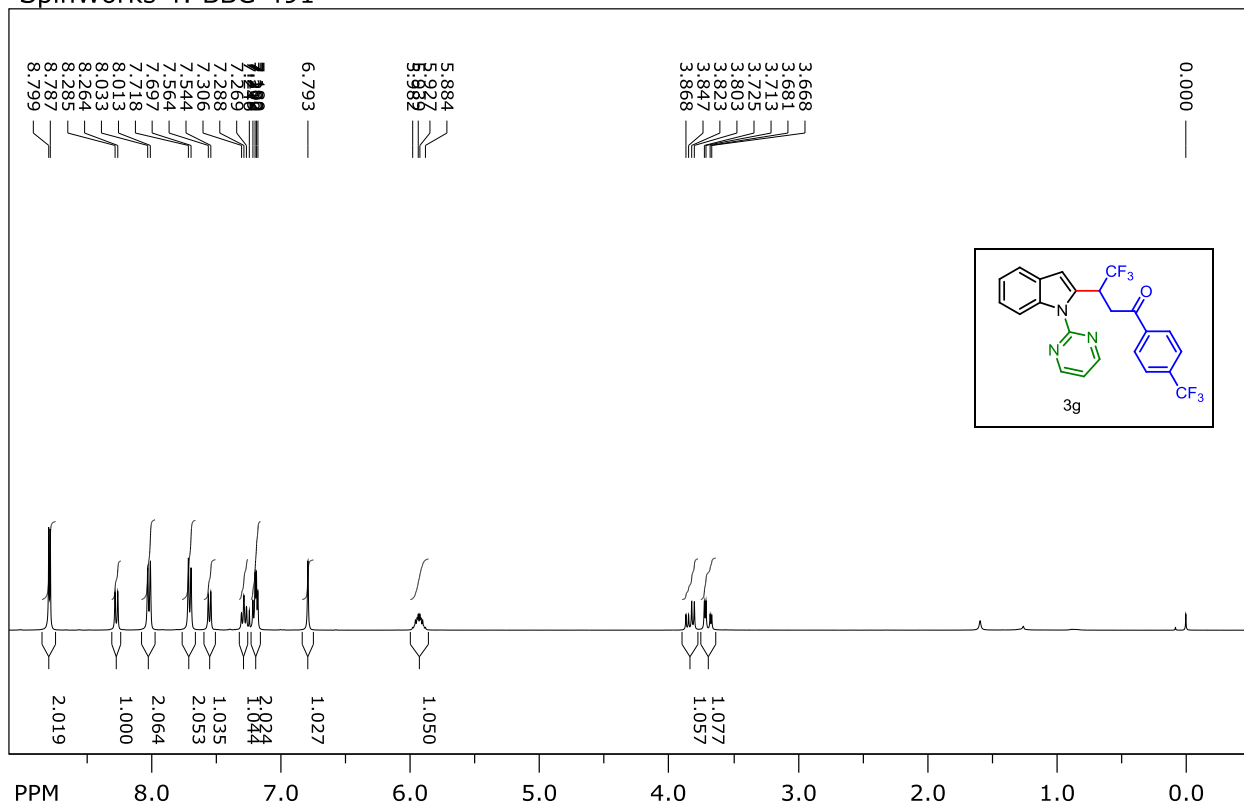

SpinWorks 4: BBC-491

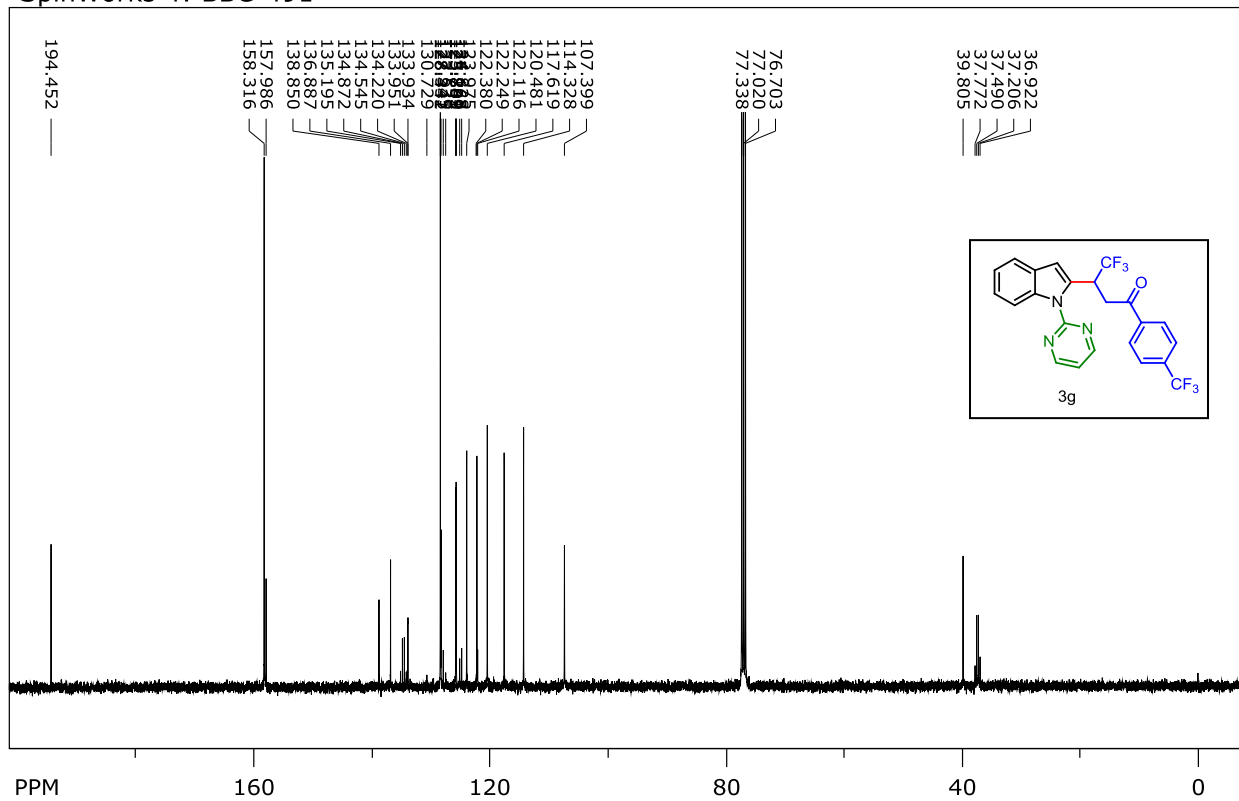

SpinWorks 4: BBC-508

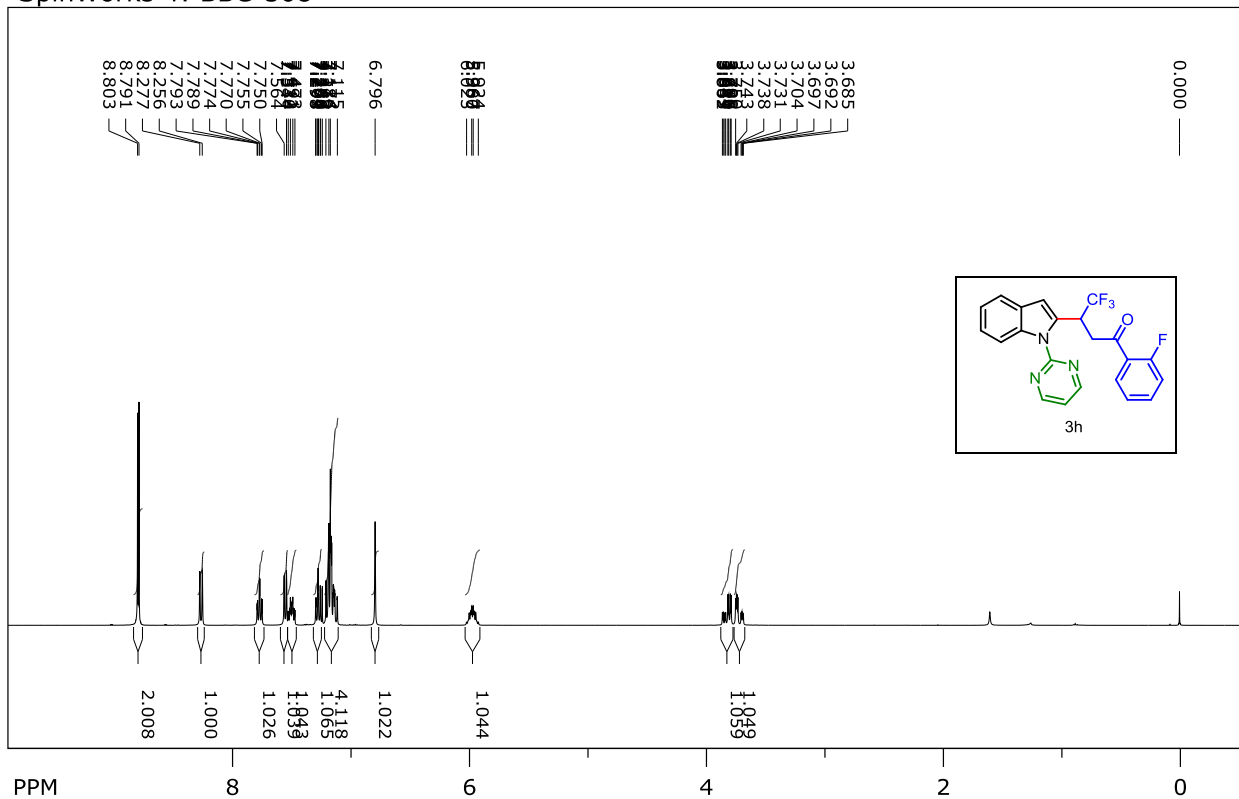

SpinWorks 4: BBC-508

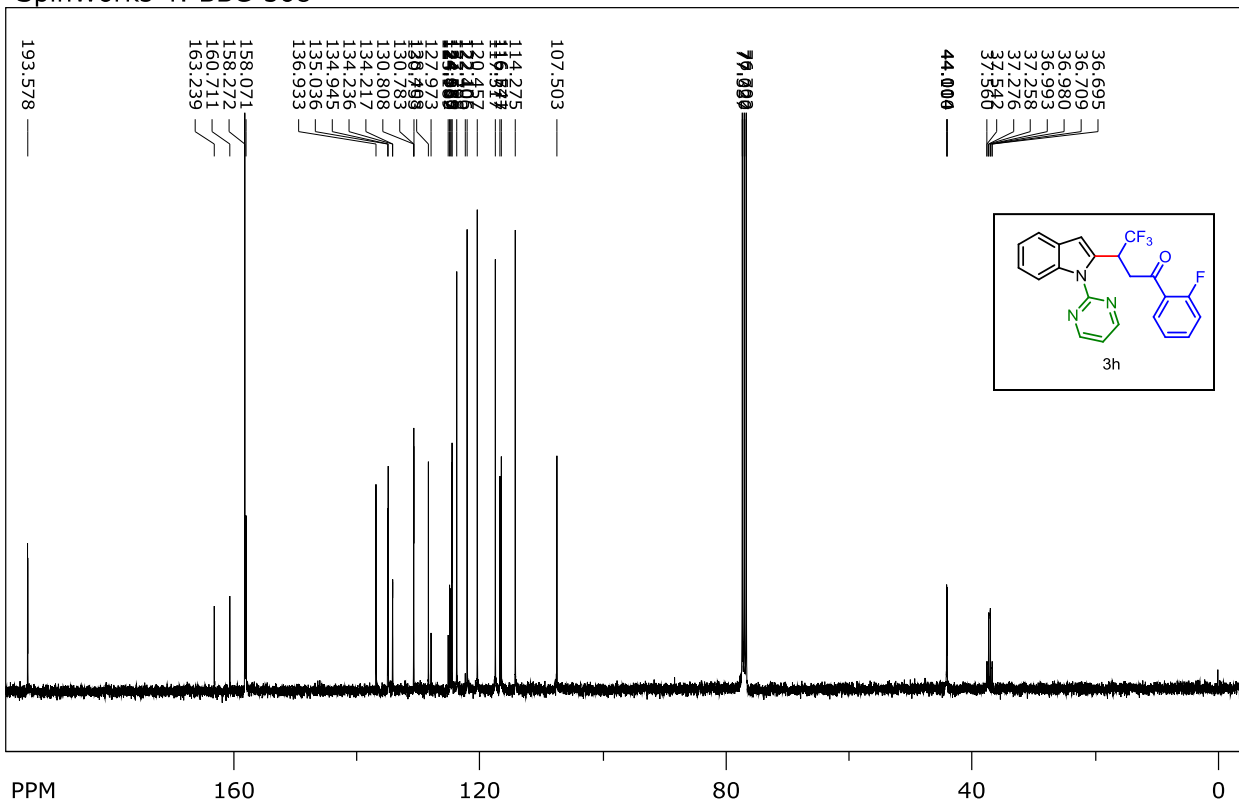

SpinWorks 4: BBC-505

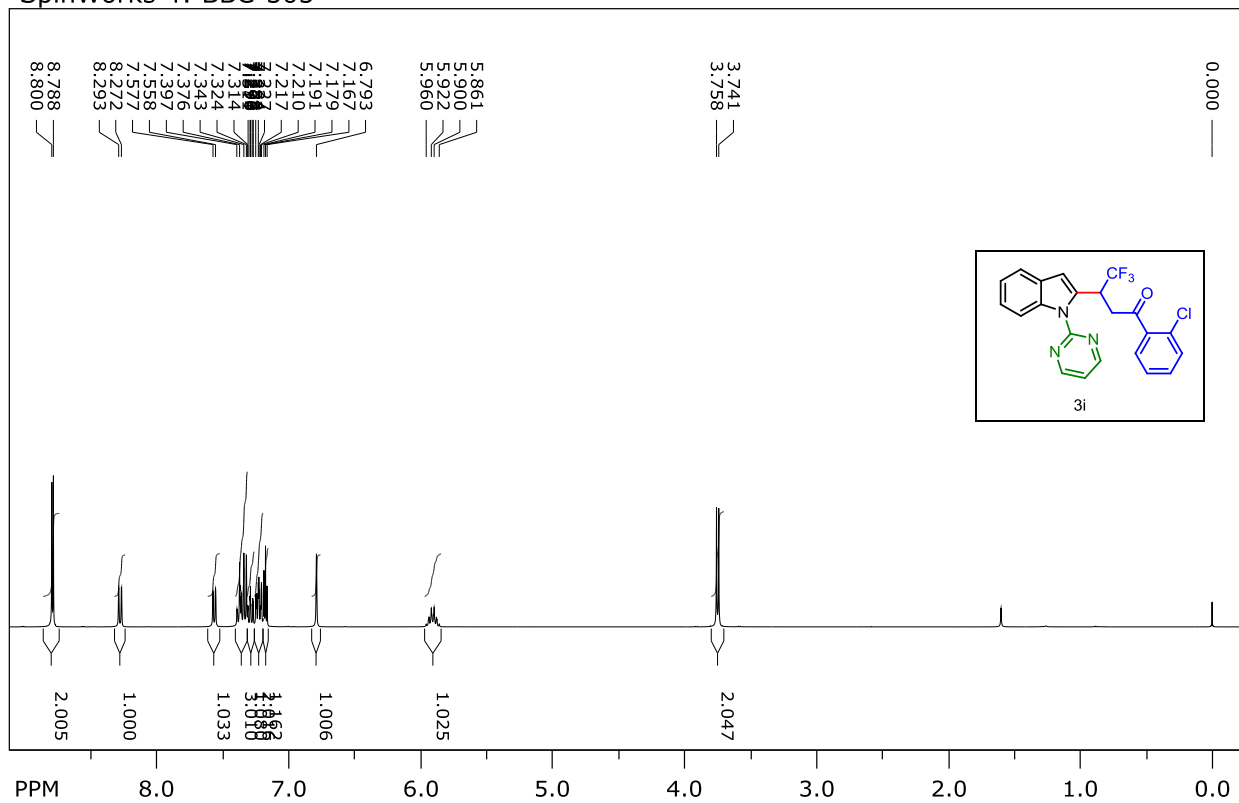

SpinWorks 4: BBC-505

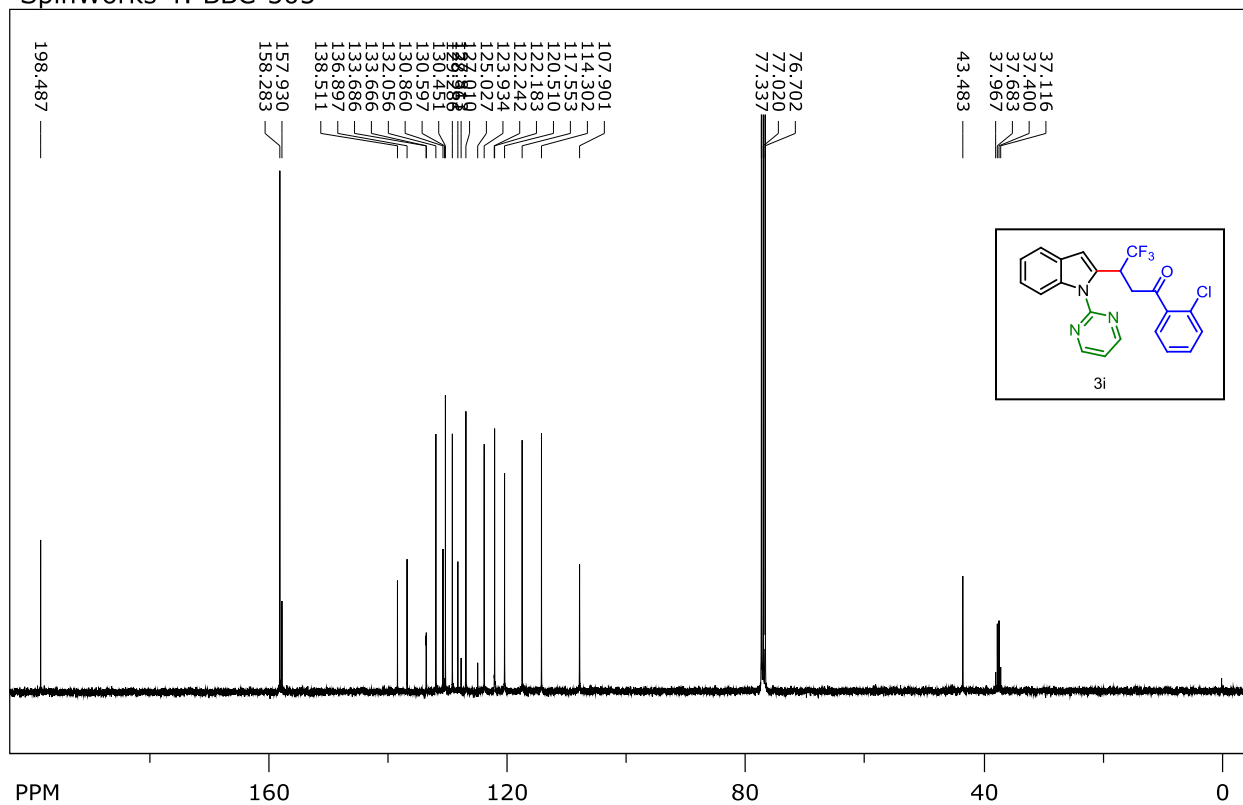



SpinWorks 4: BBC-553

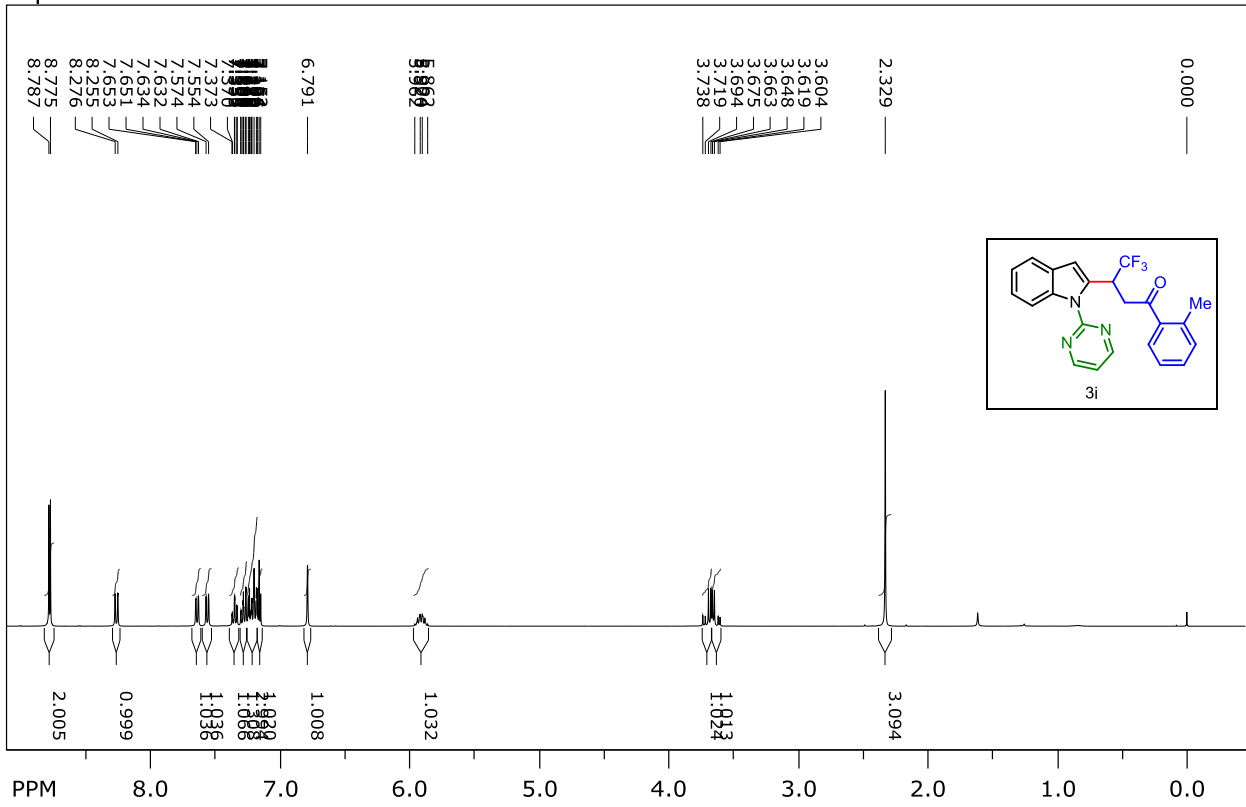

SpinWorks 4: BBC-553

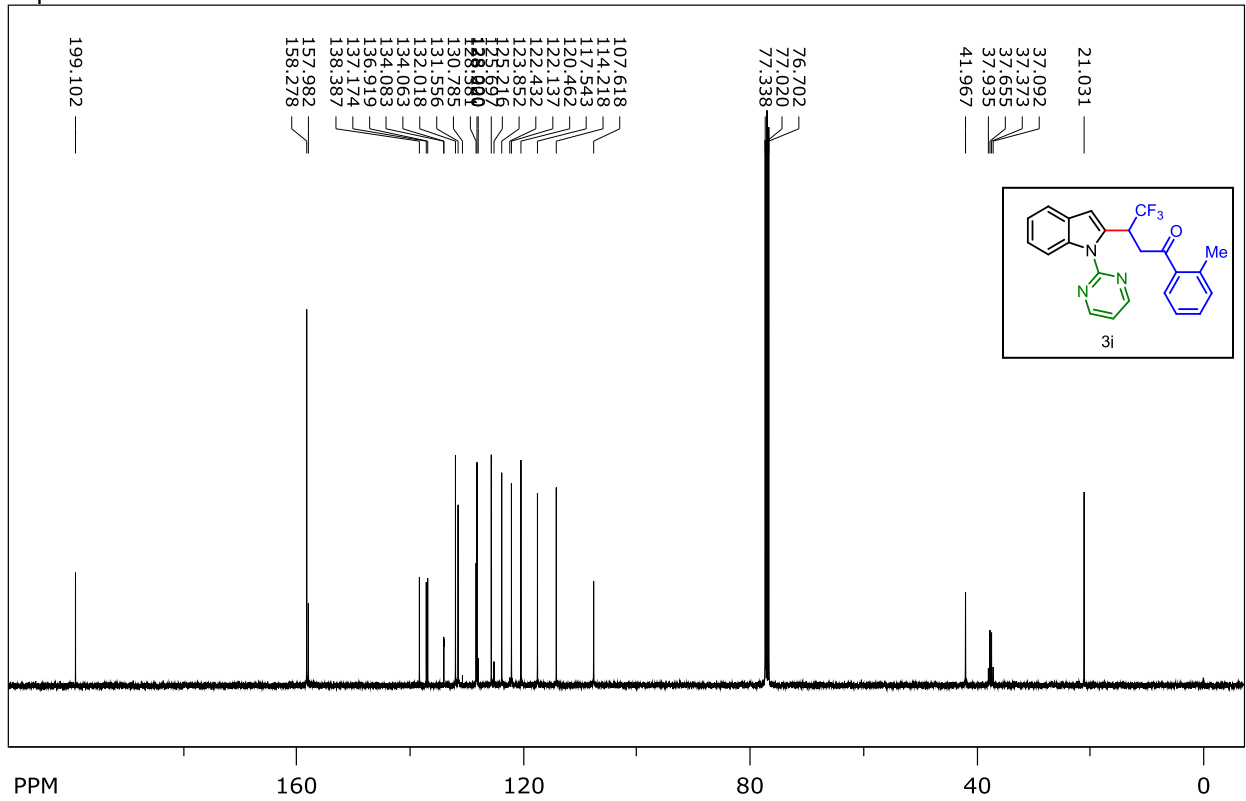

SpinWorks 4: BBC-507

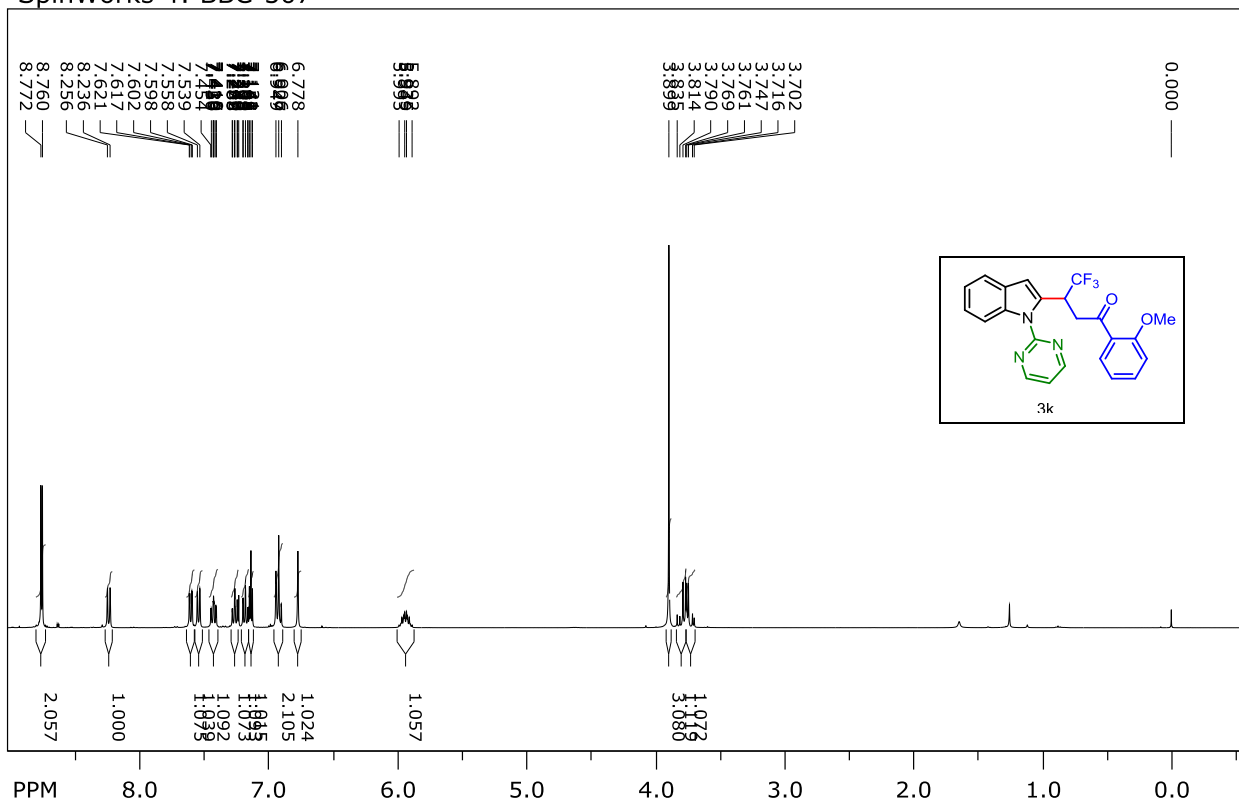

SpinWorks 4: BBC-507

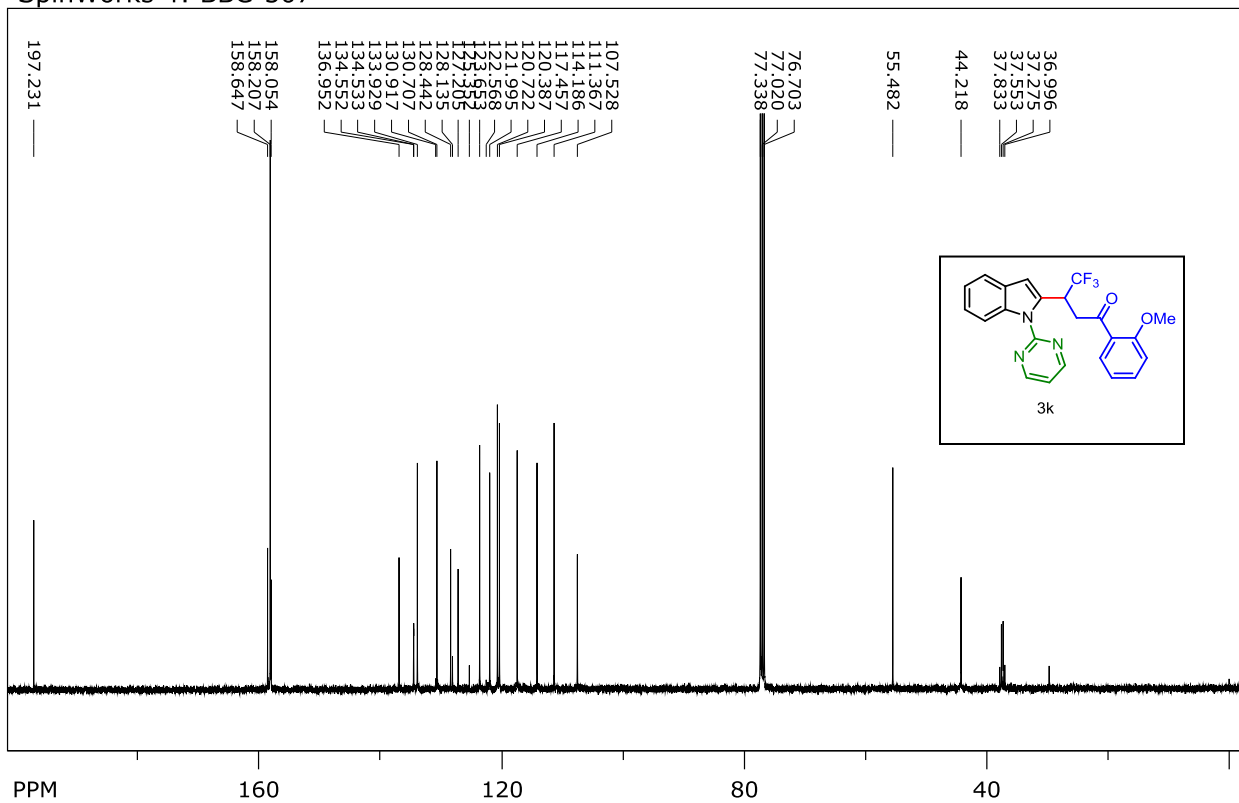

SpinWorks 4: BBC-485

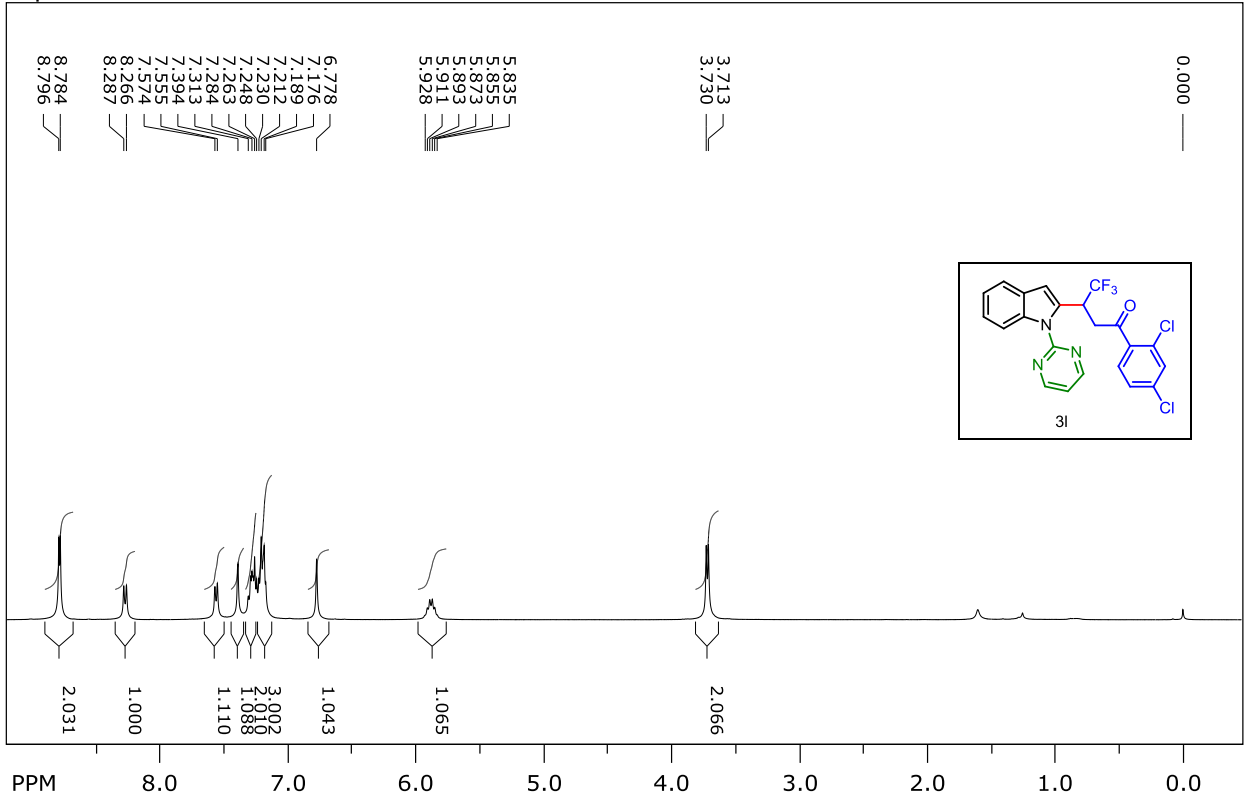

SpinWorks 4: BBC-485

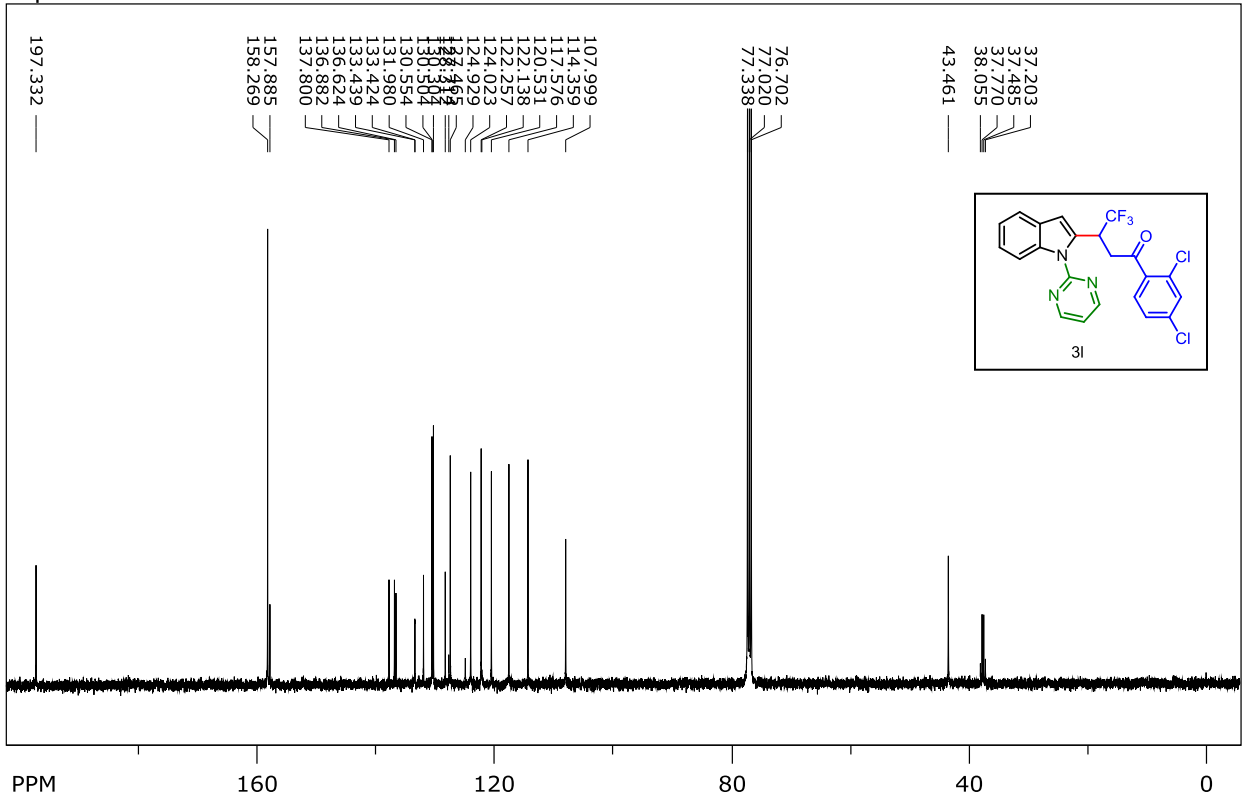

SpinWorks 4: BBC-506

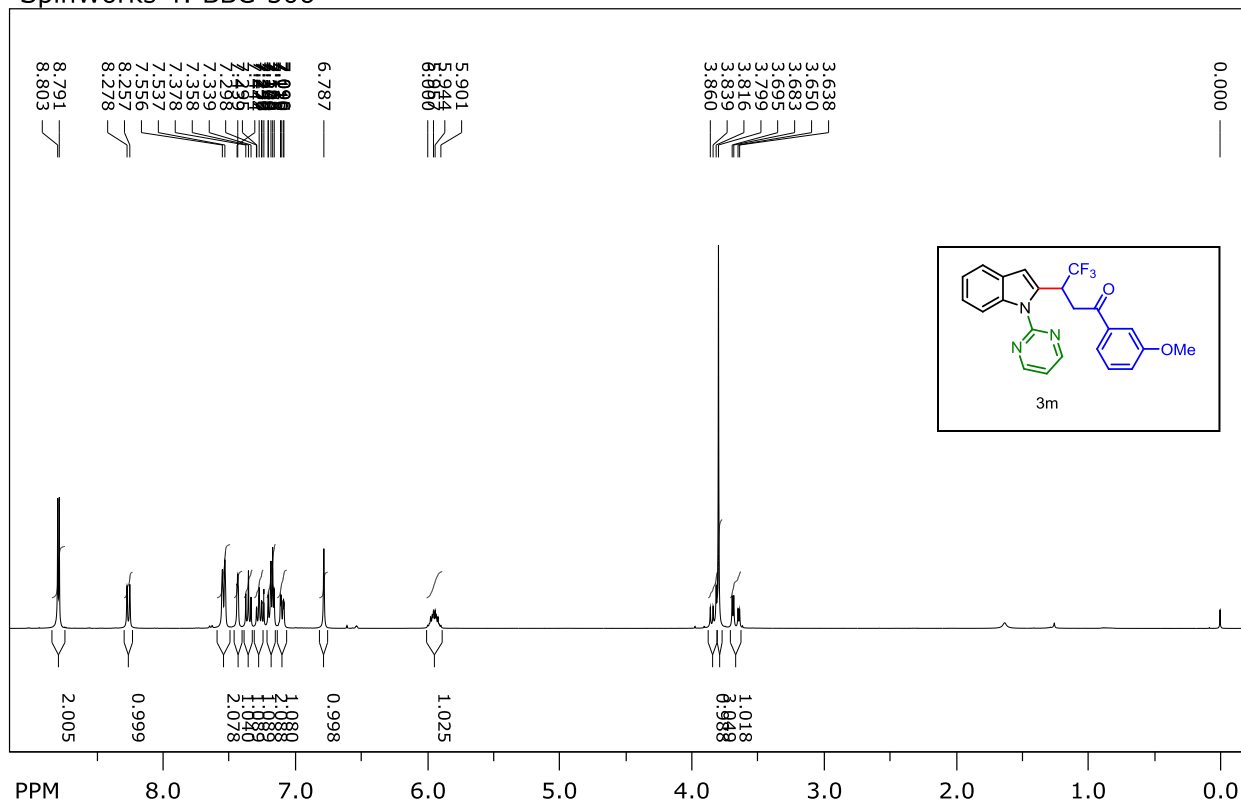

SpinWorks 4: BBC-506

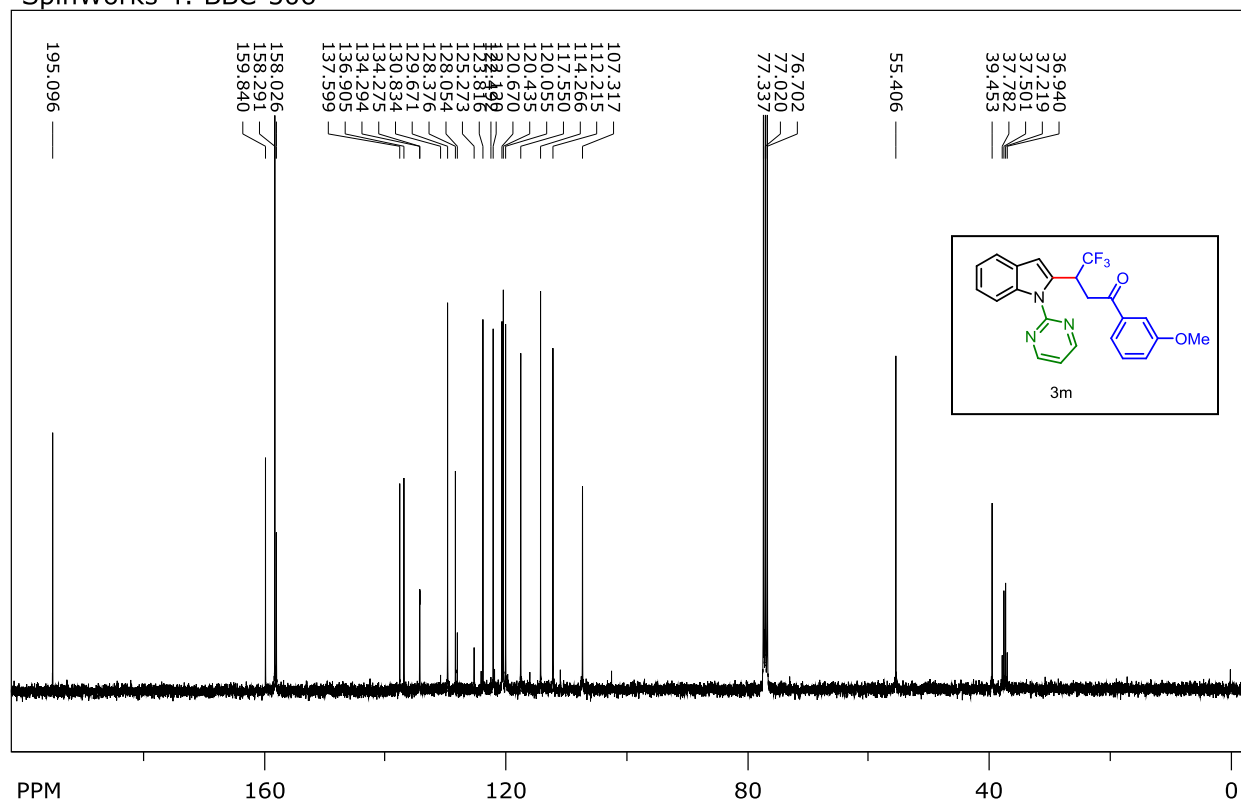

SpinWorks 4: BBC-504

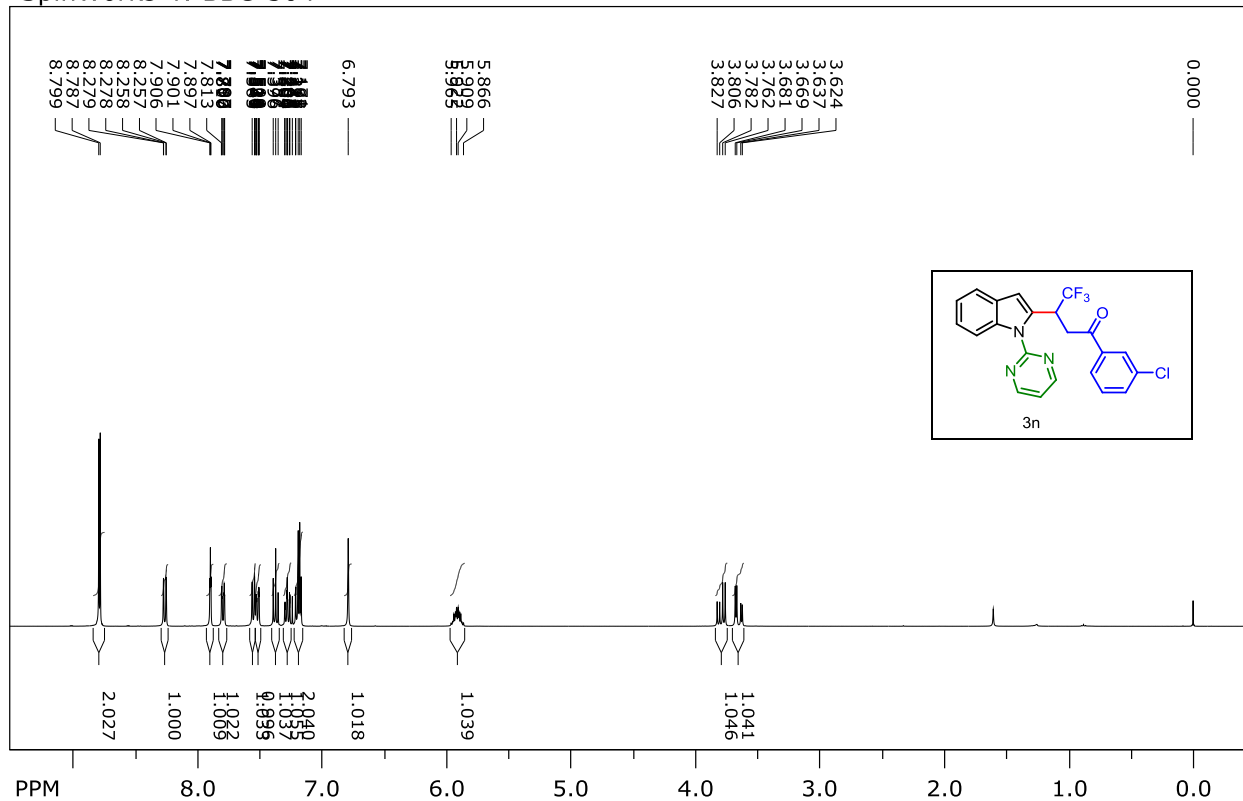

SpinWorks 4: BBC-504

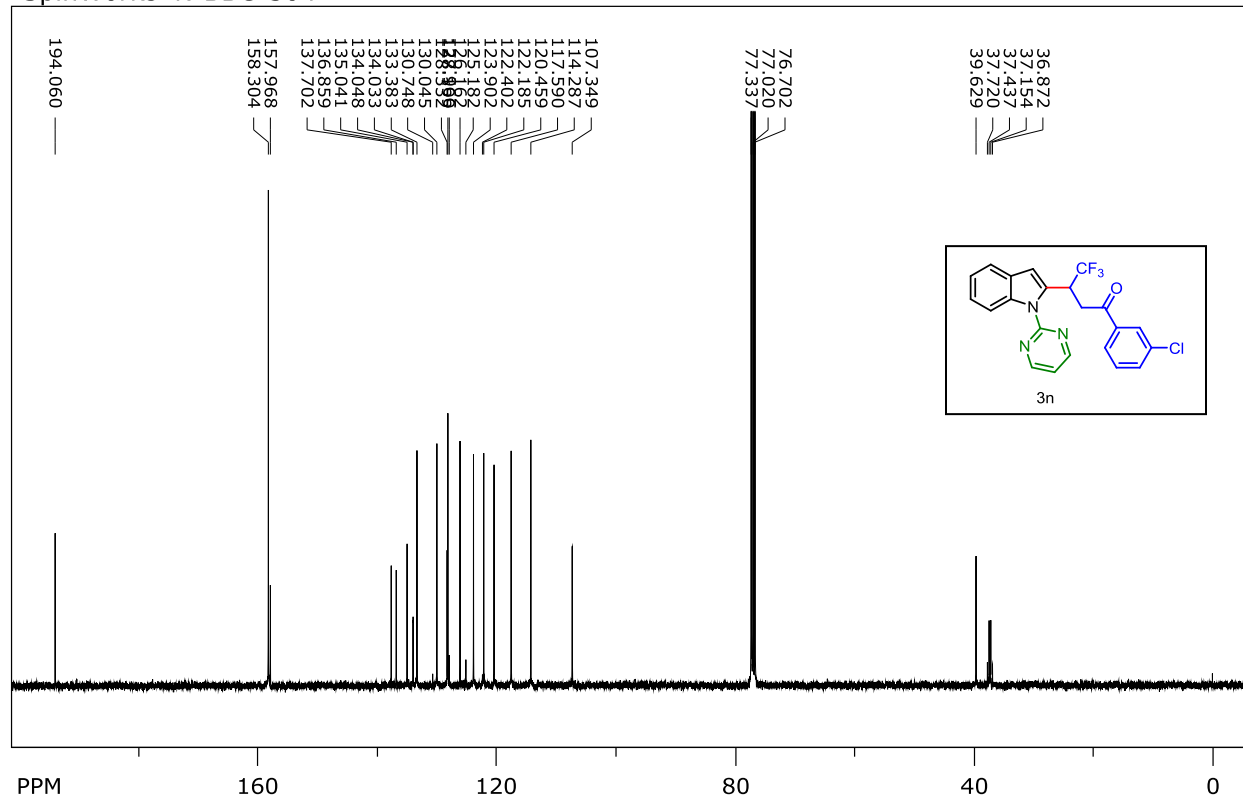

SpinWorks 4: BBC-554

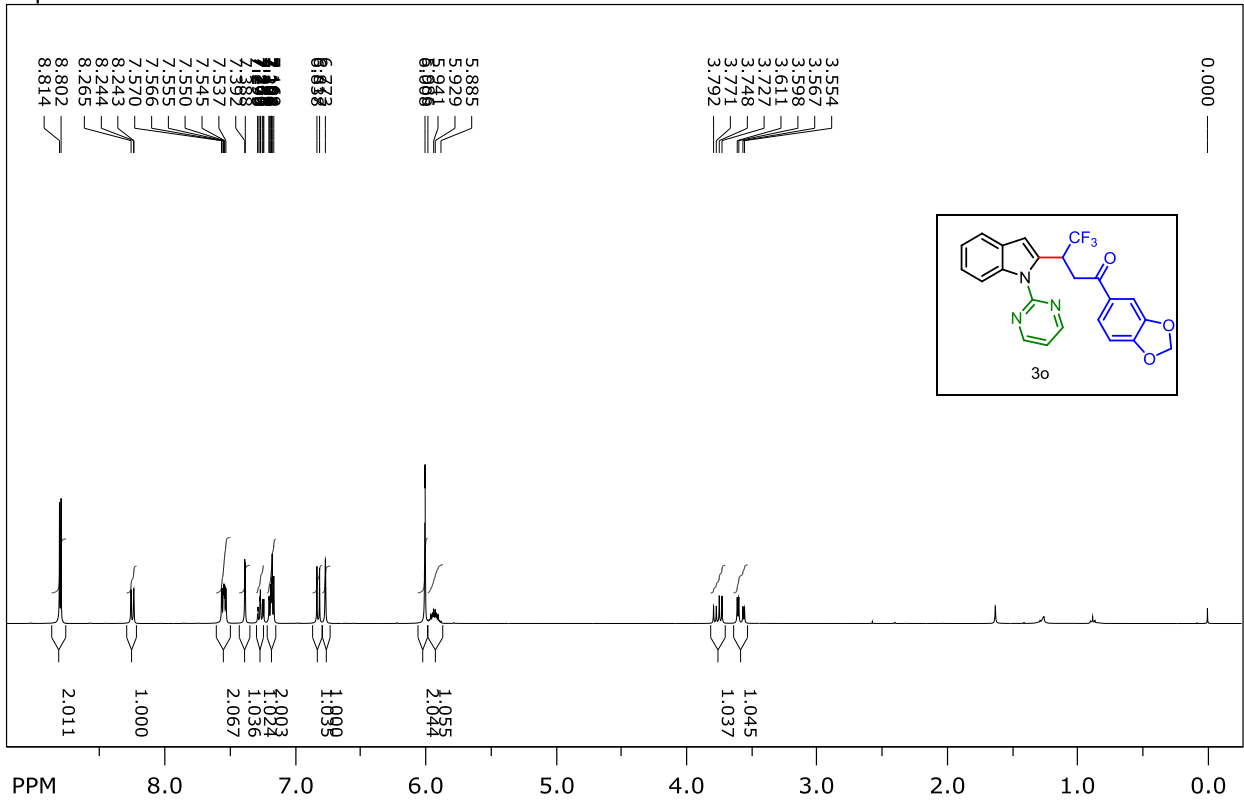

SpinWorks 4: BBC-554

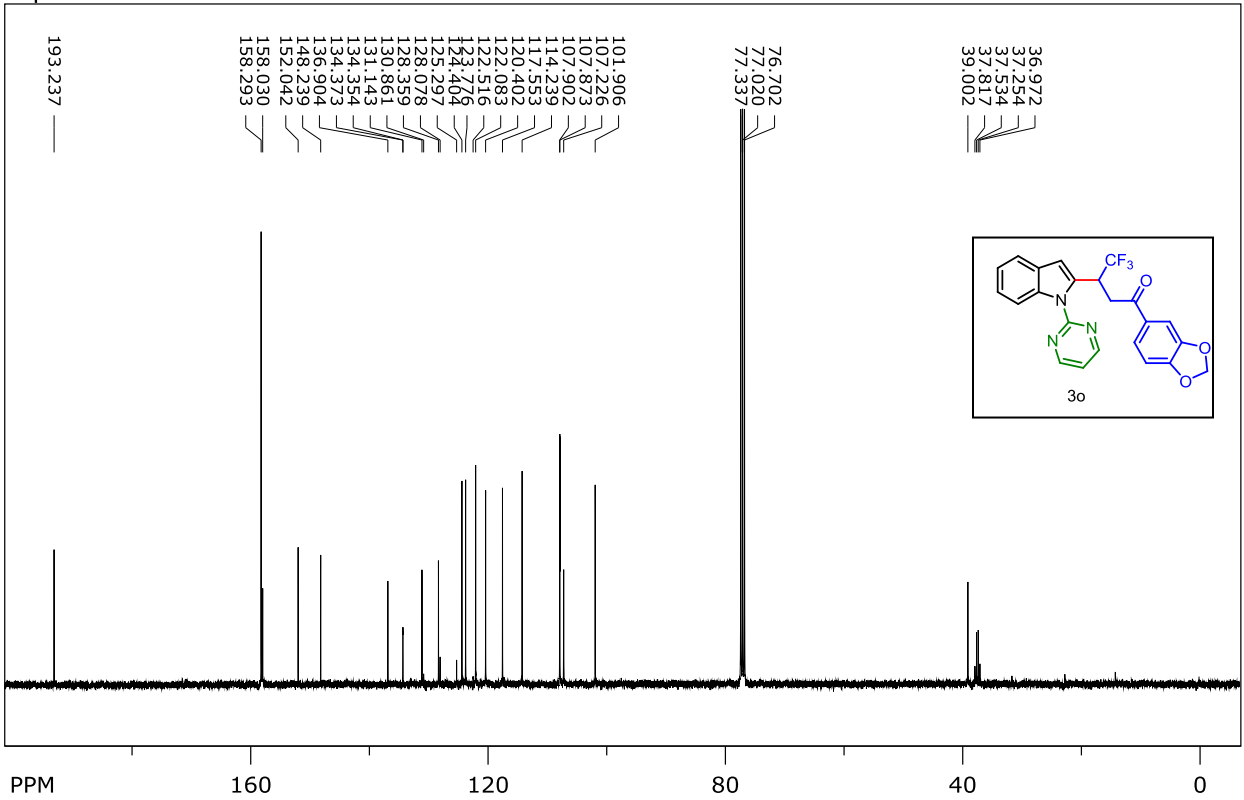

SpinWorks 4: BBC-556

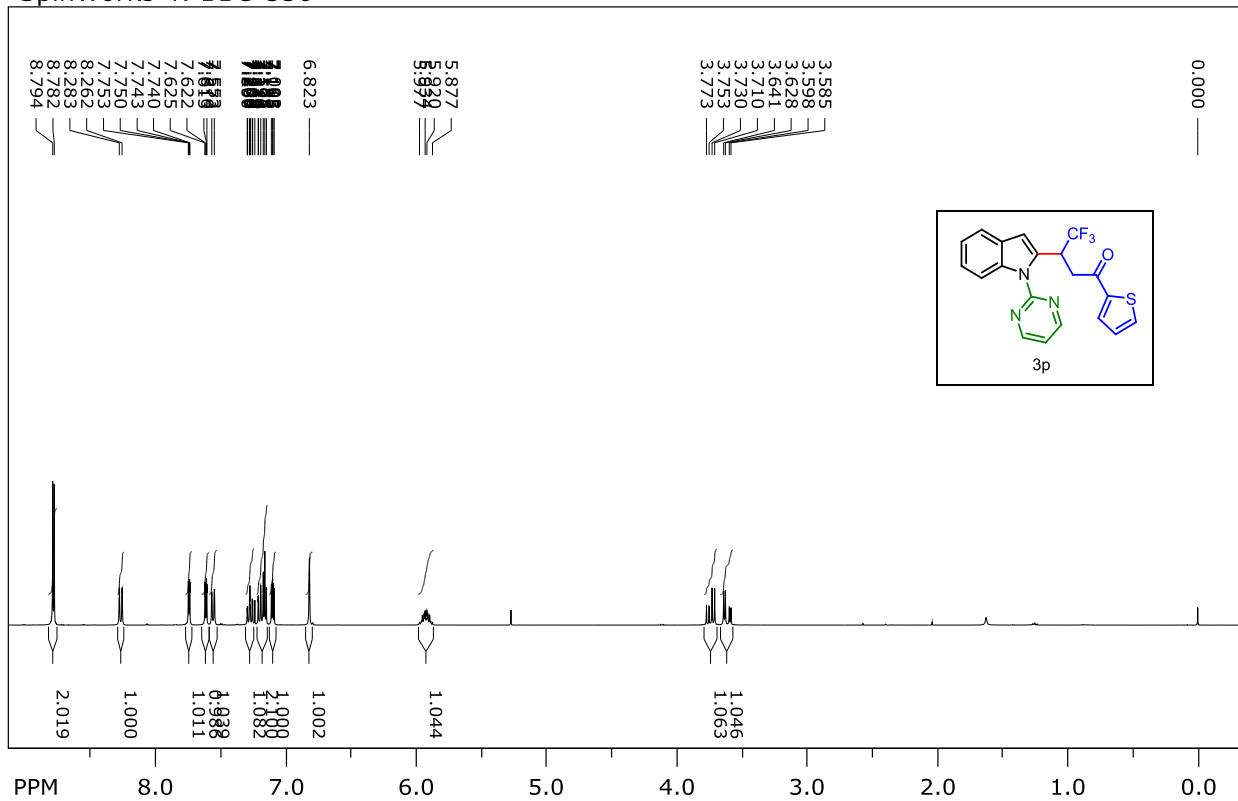

SpinWorks 4: BBC-556

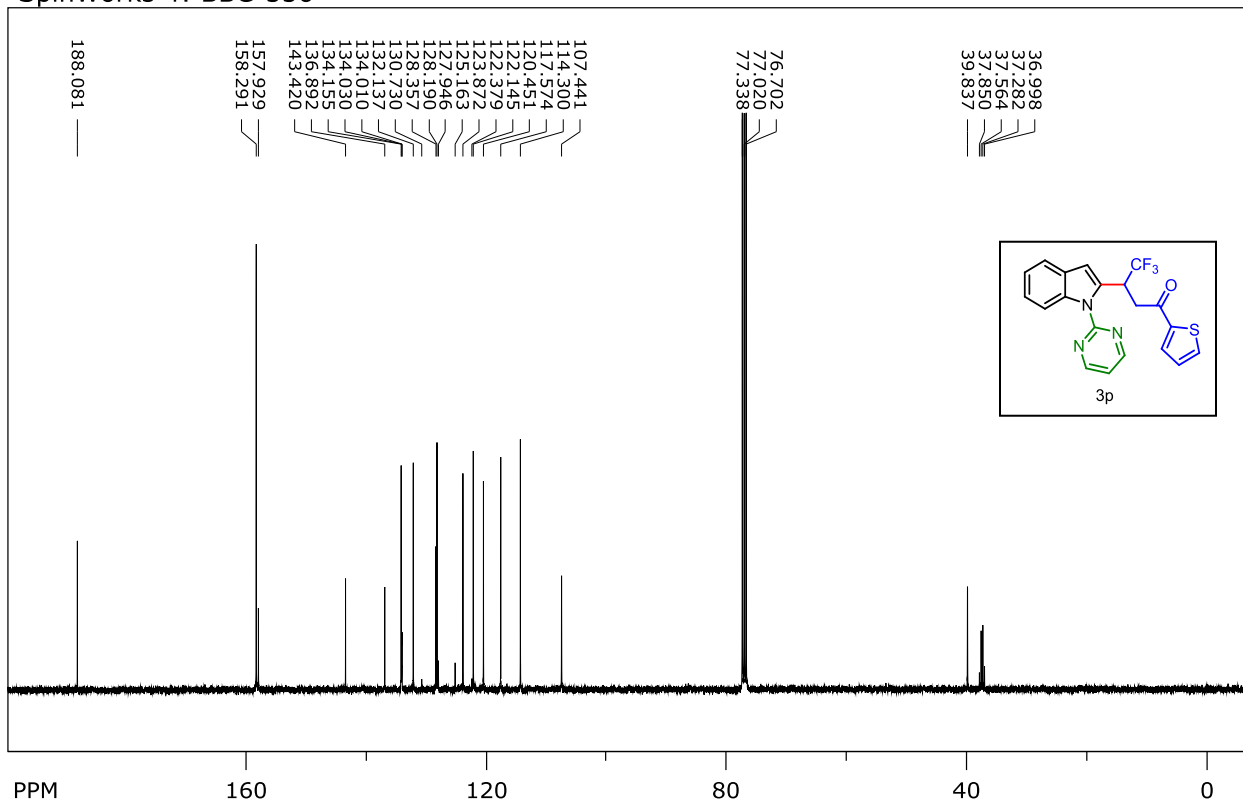

SpinWorks 4: BBC-569

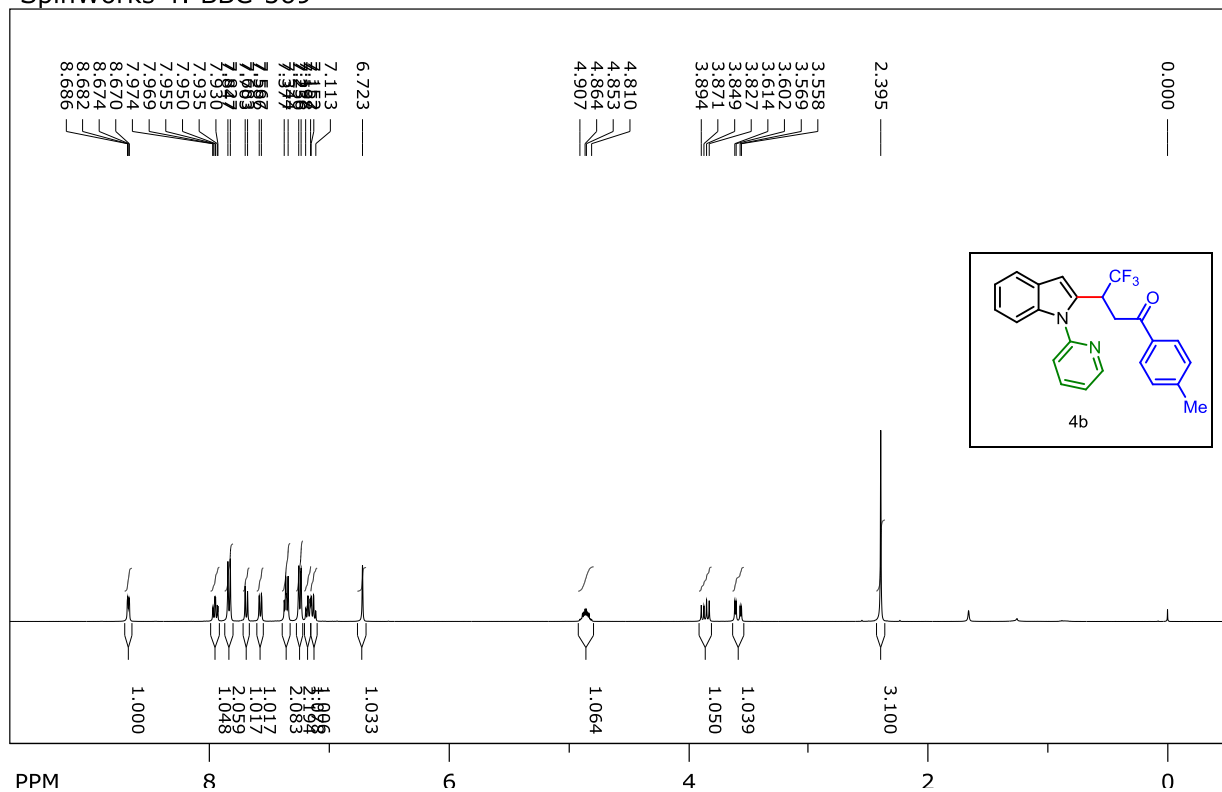

SpinWorks 4: BBC-569

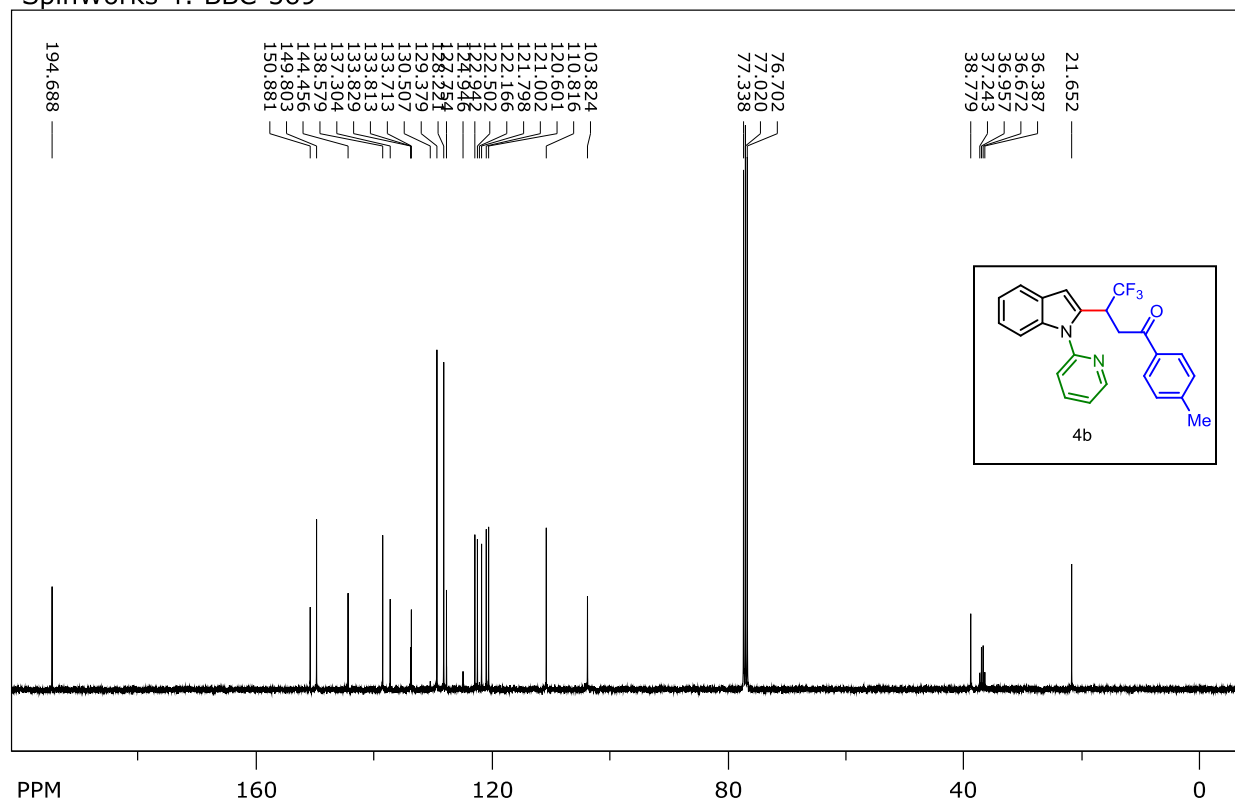



SpinWorks 4: BBC-548

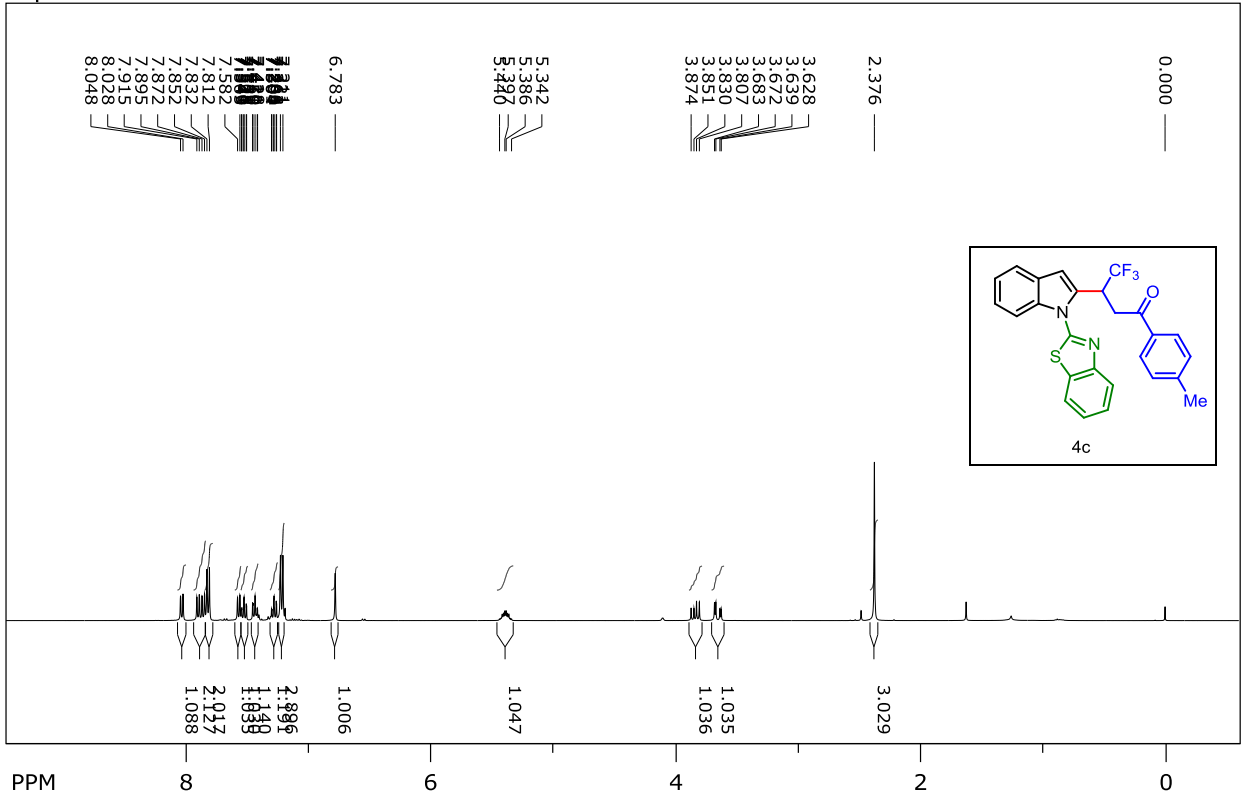

SpinWorks 4: BBC-548

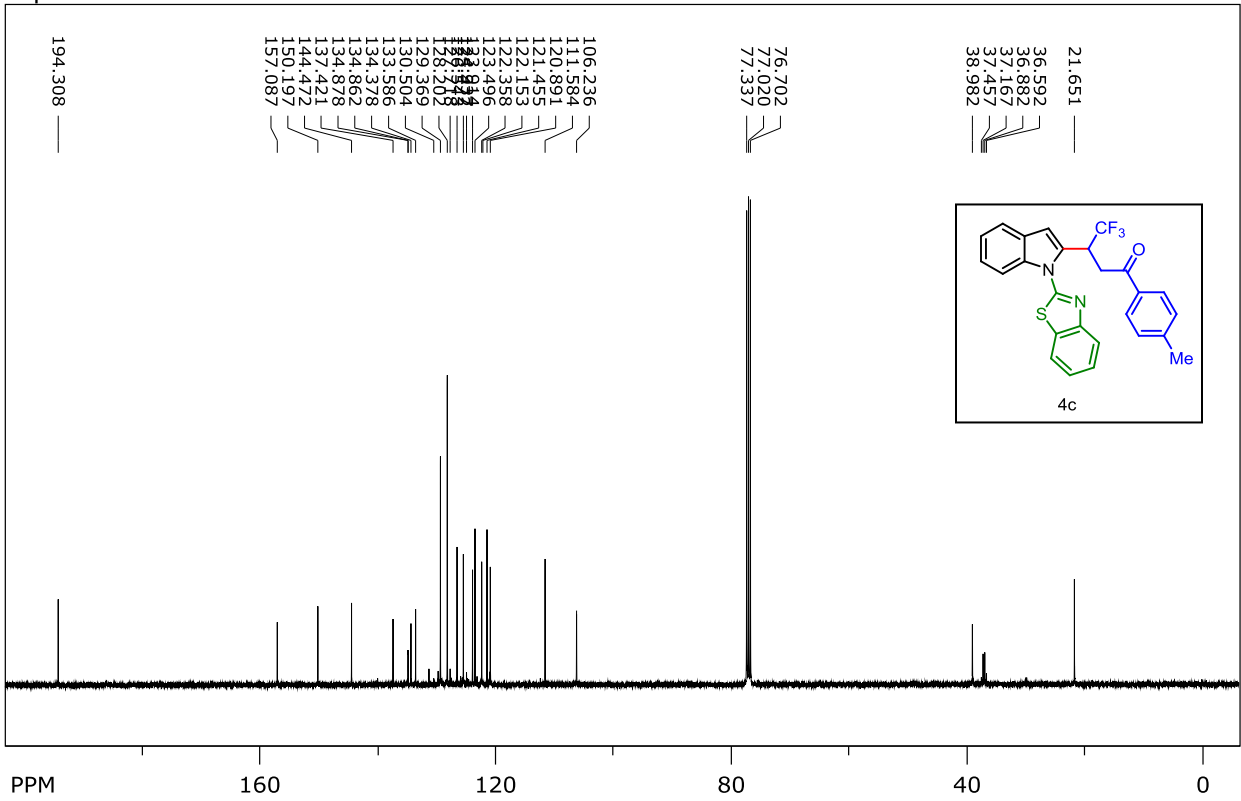

SpinWorks 4: BBC-537

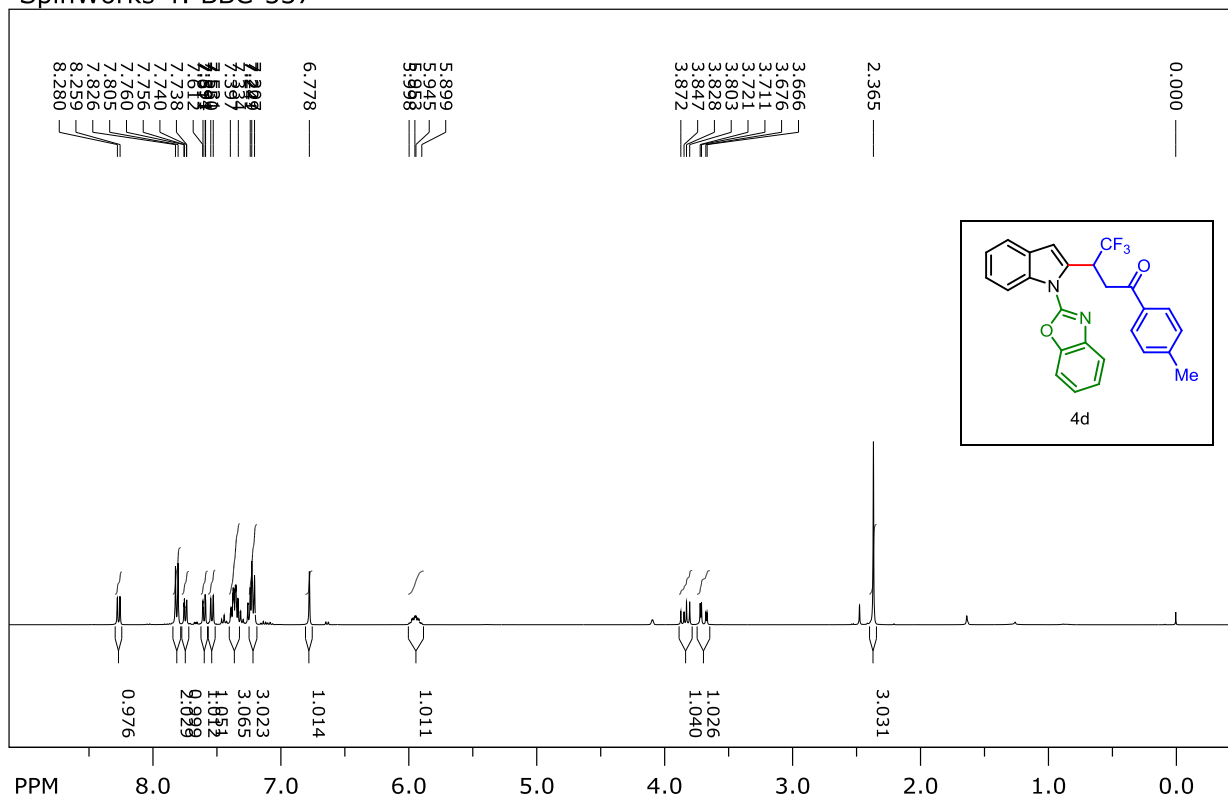

SpinWorks 4: BBC-537

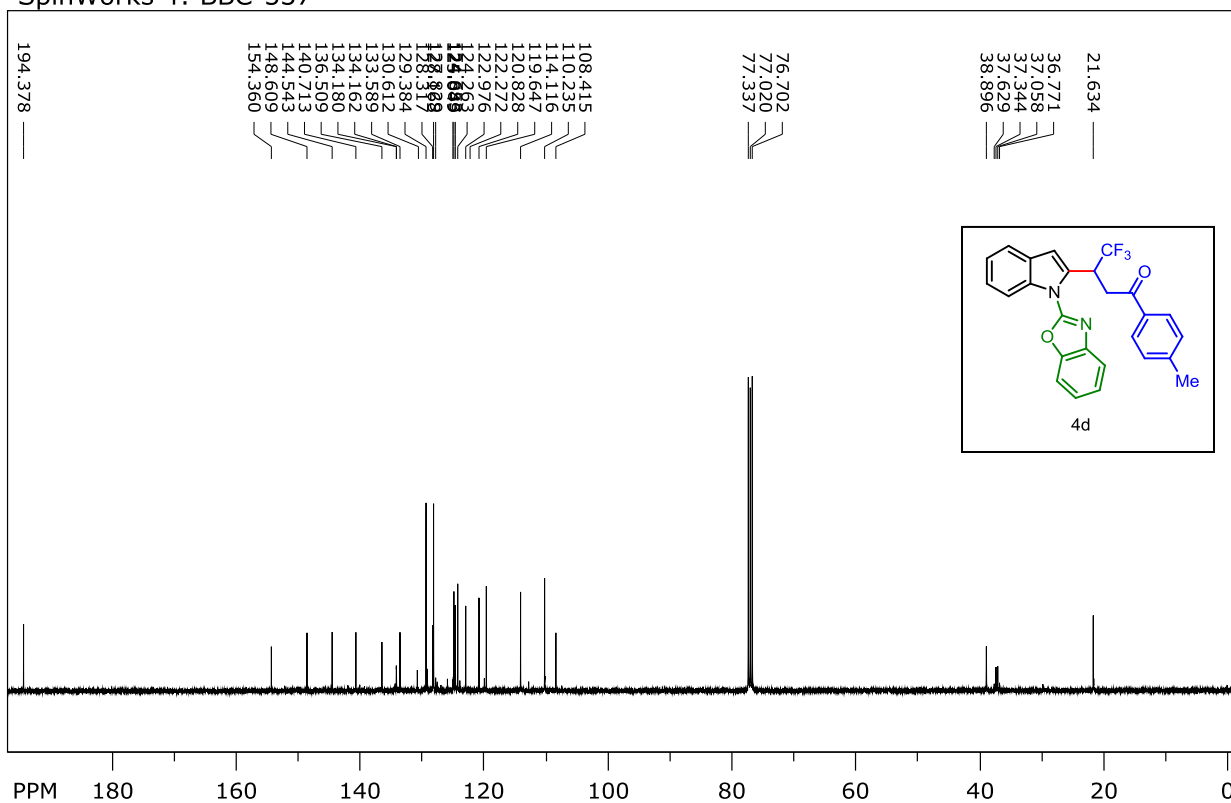

SpinWorks 4: BBC-570

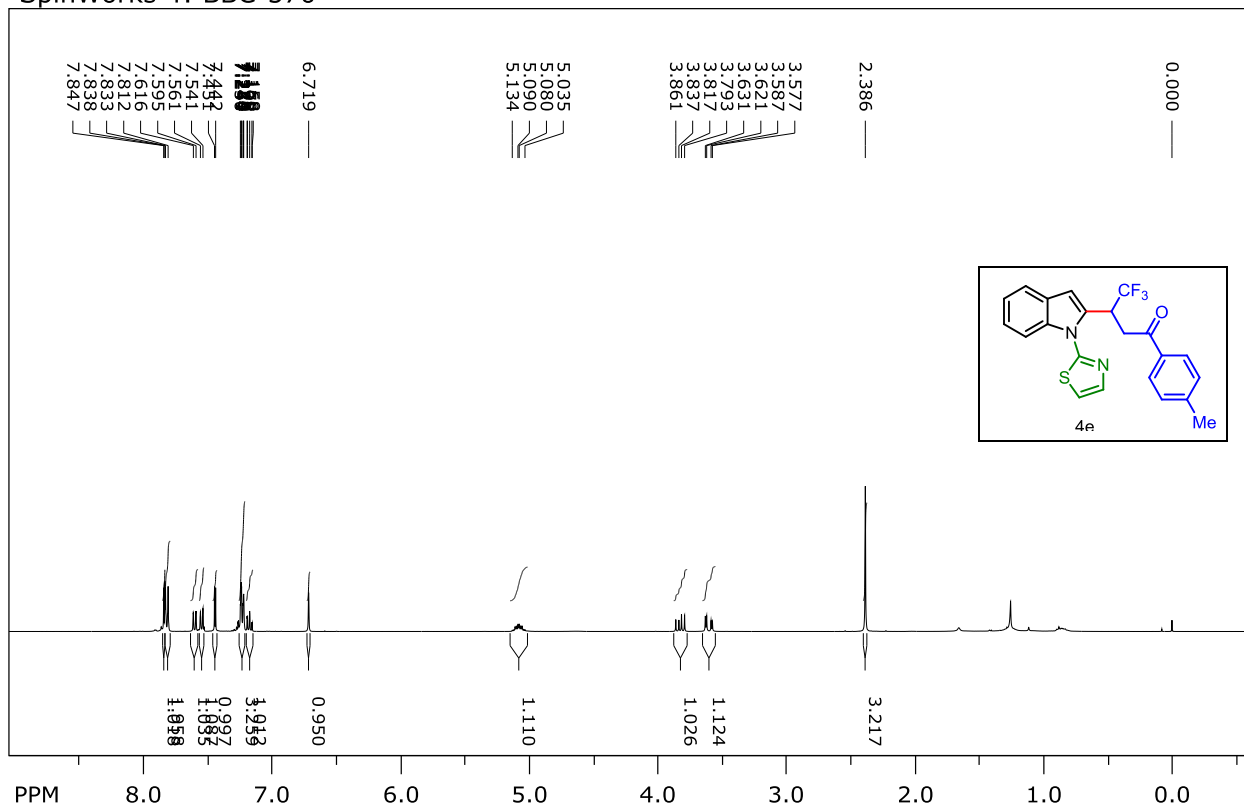

SpinWorks 4: BBC-570

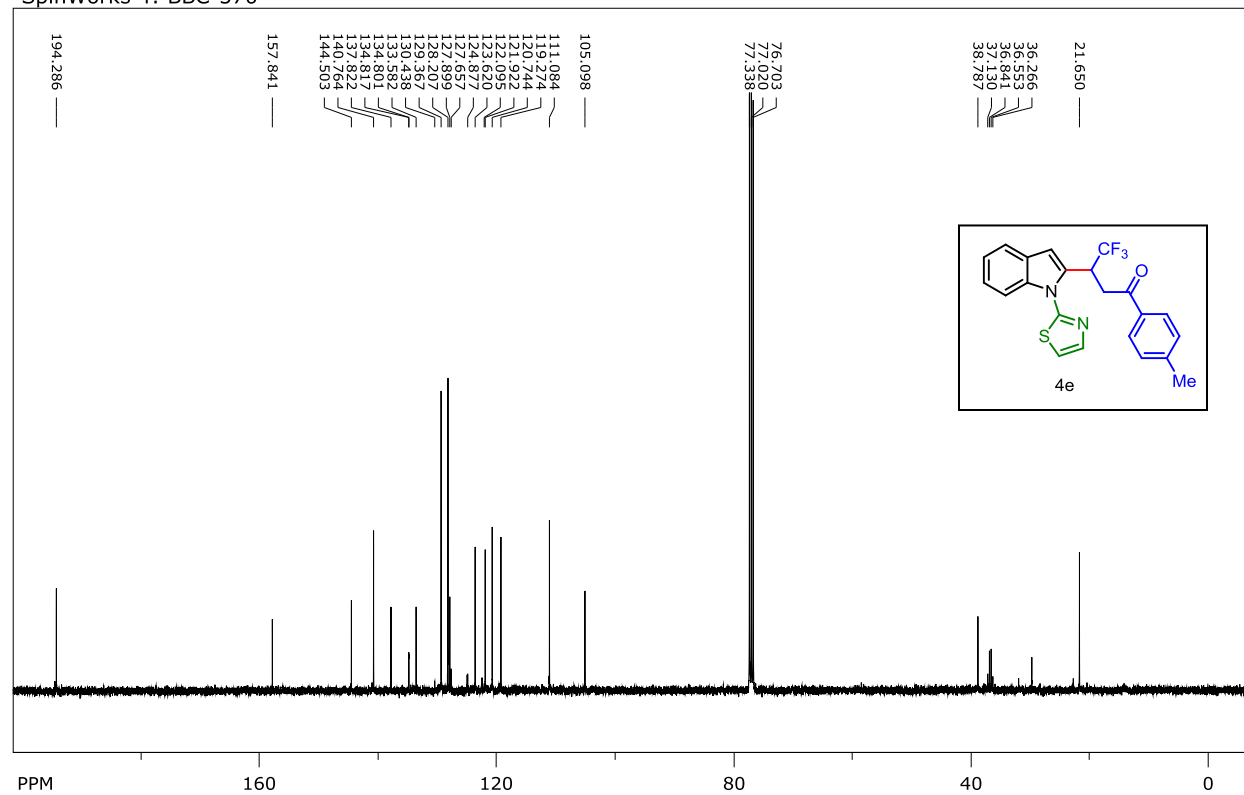

SpinWorks 4: BBC-609

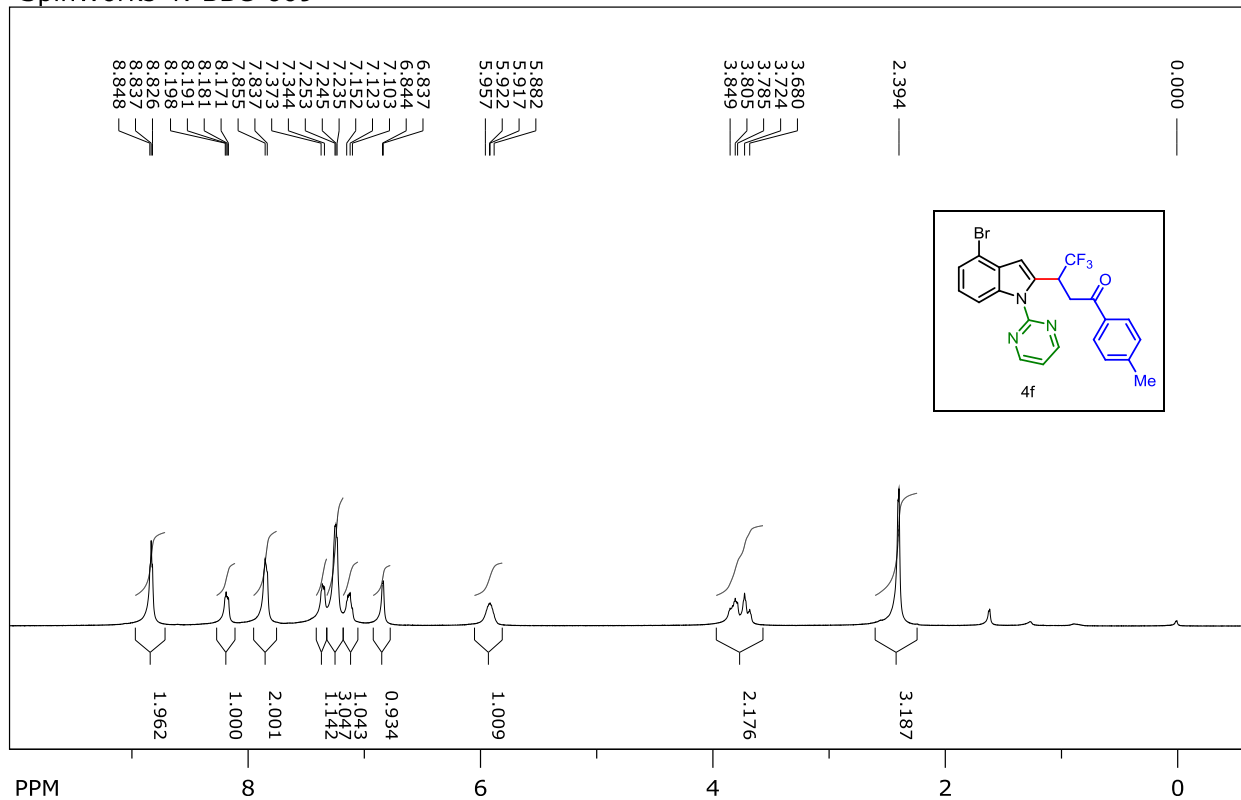

SpinWorks 4: BBC-609

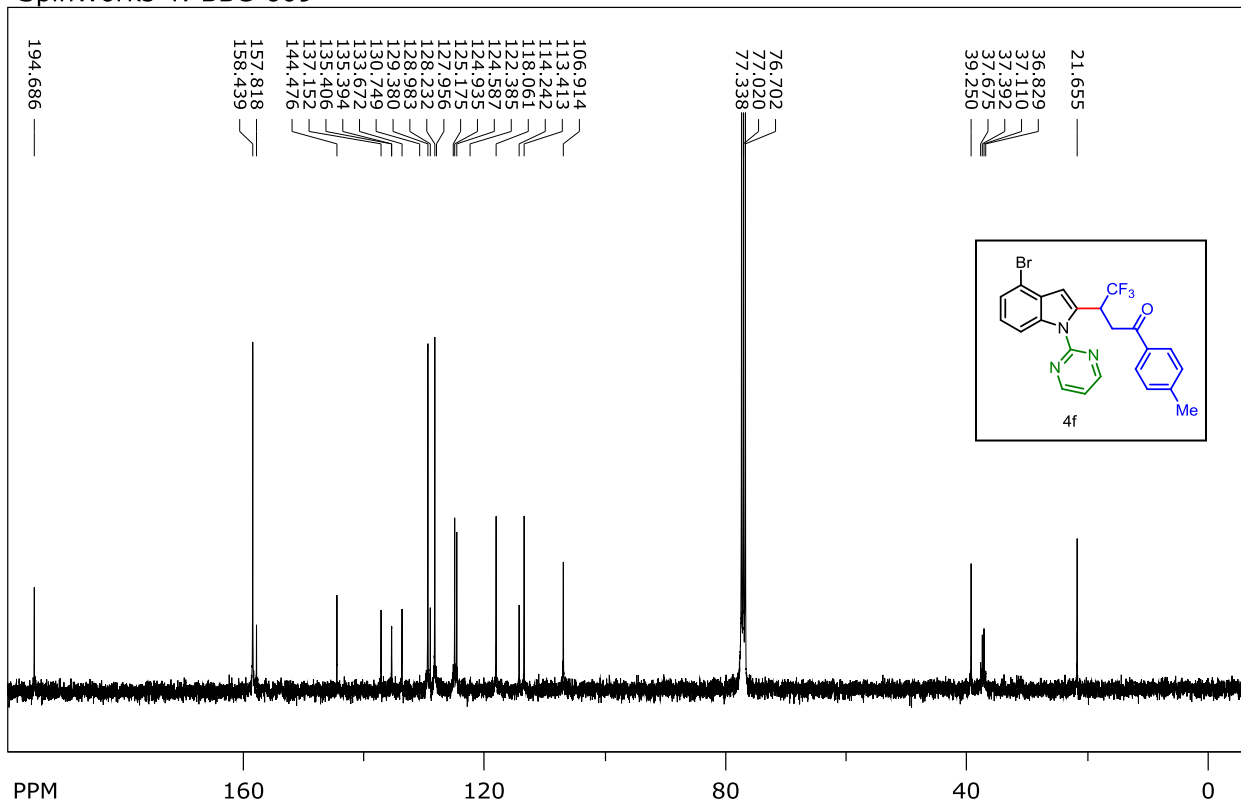

SpinWorks 4: BBC-526

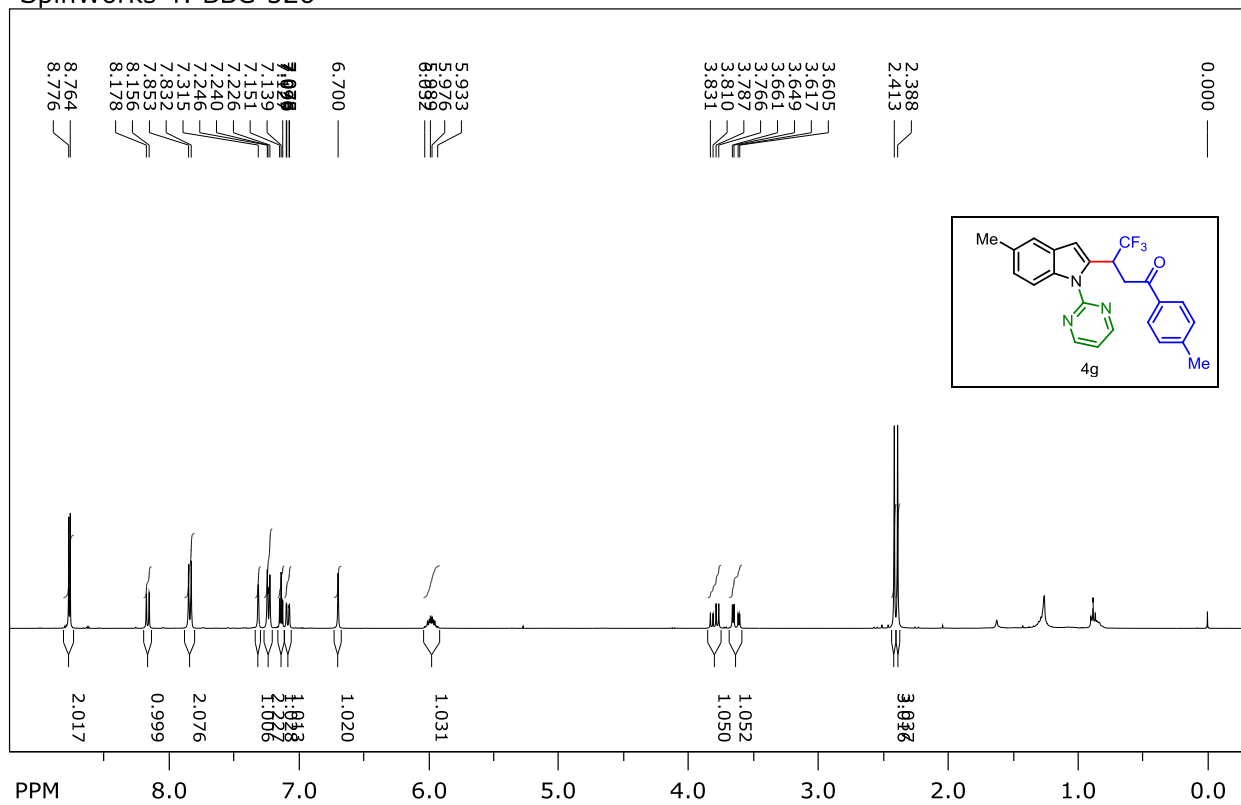

SpinWorks 4: BBC-526

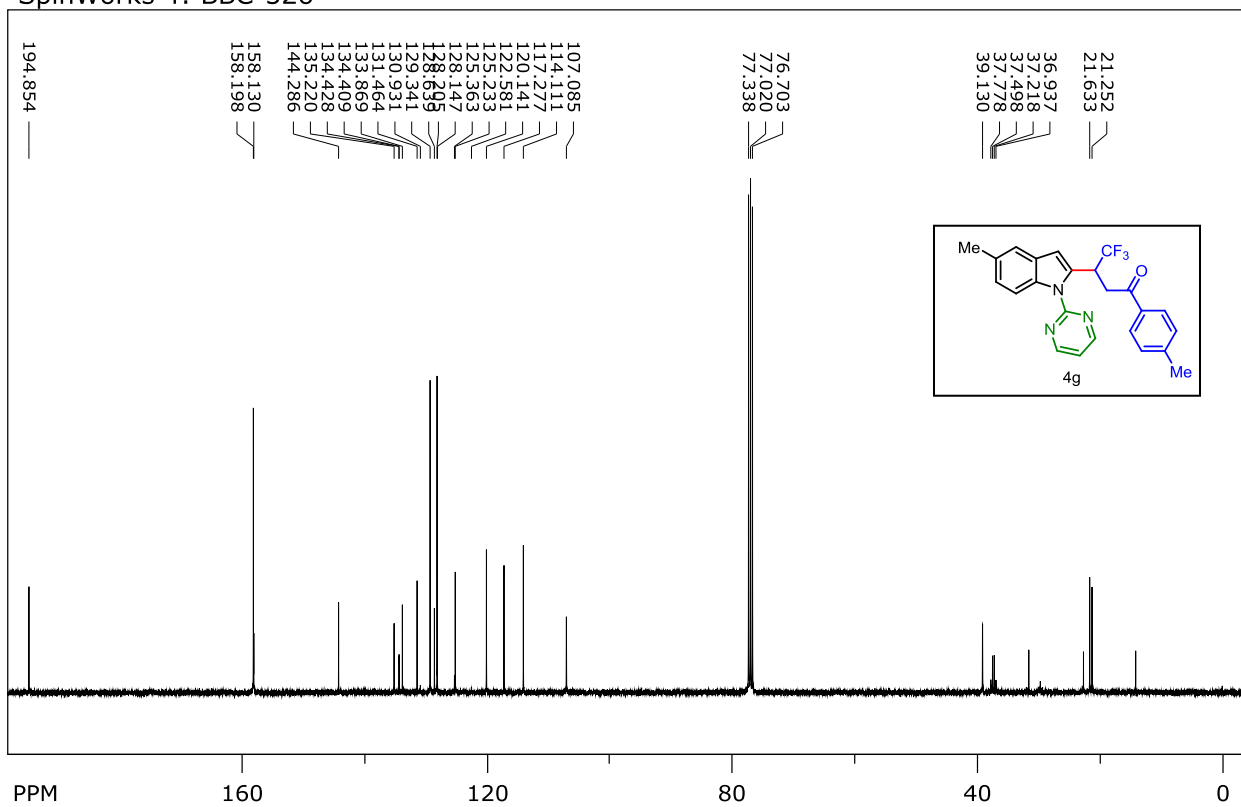

SpinWorks 4: BBC-522

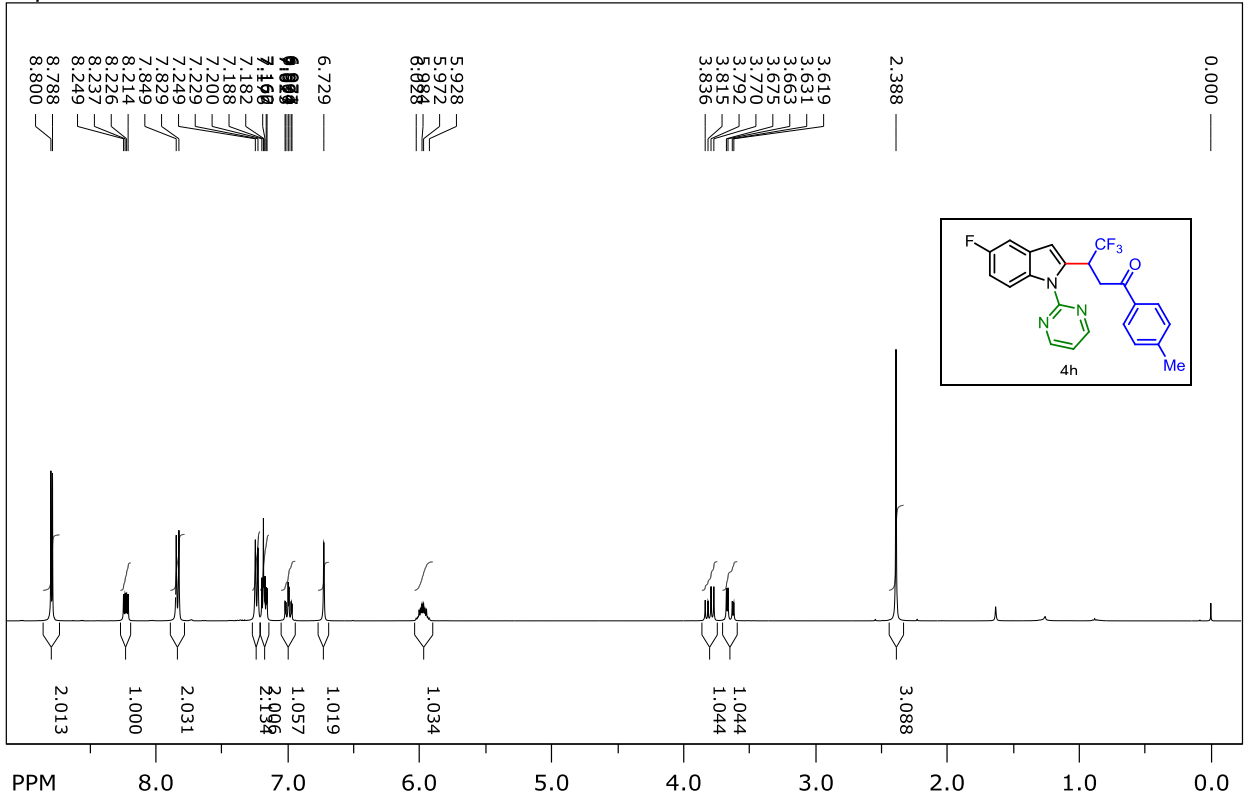

SpinWorks 4: BBC-522

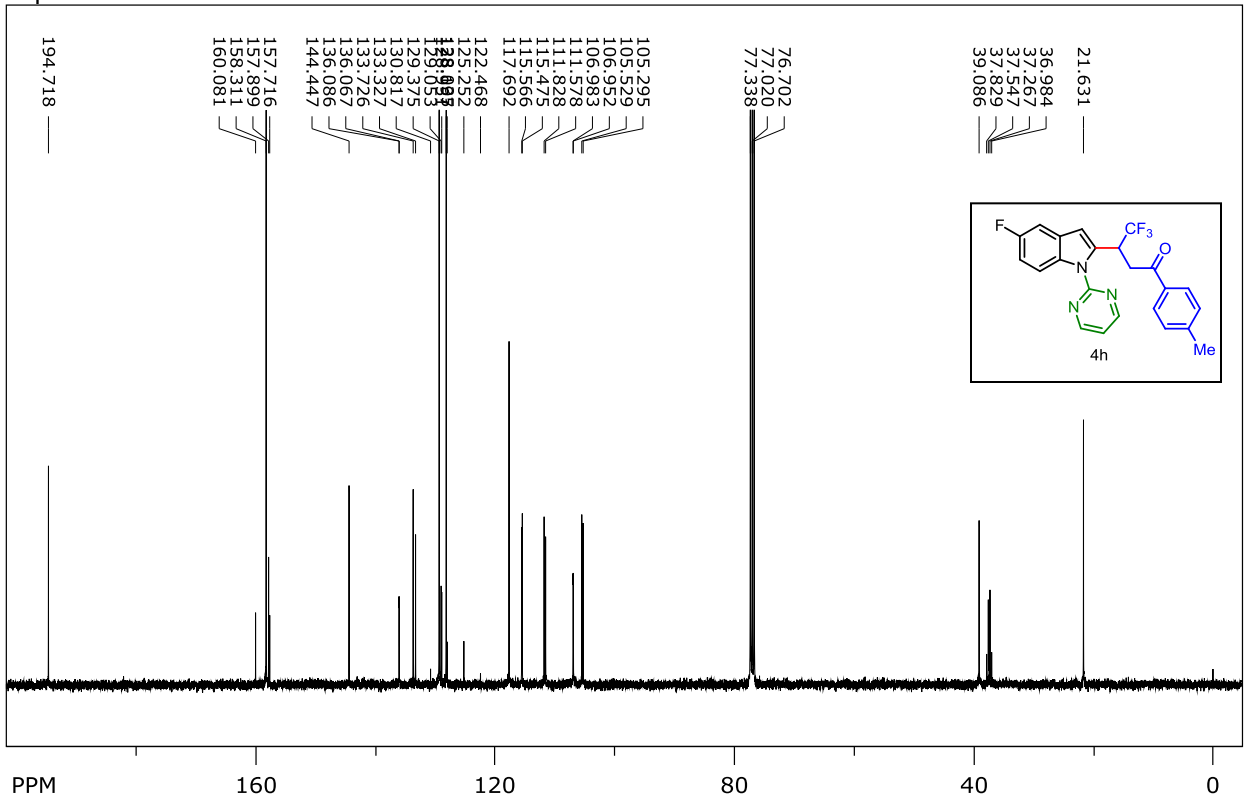

SpinWorks 4: BBC-521

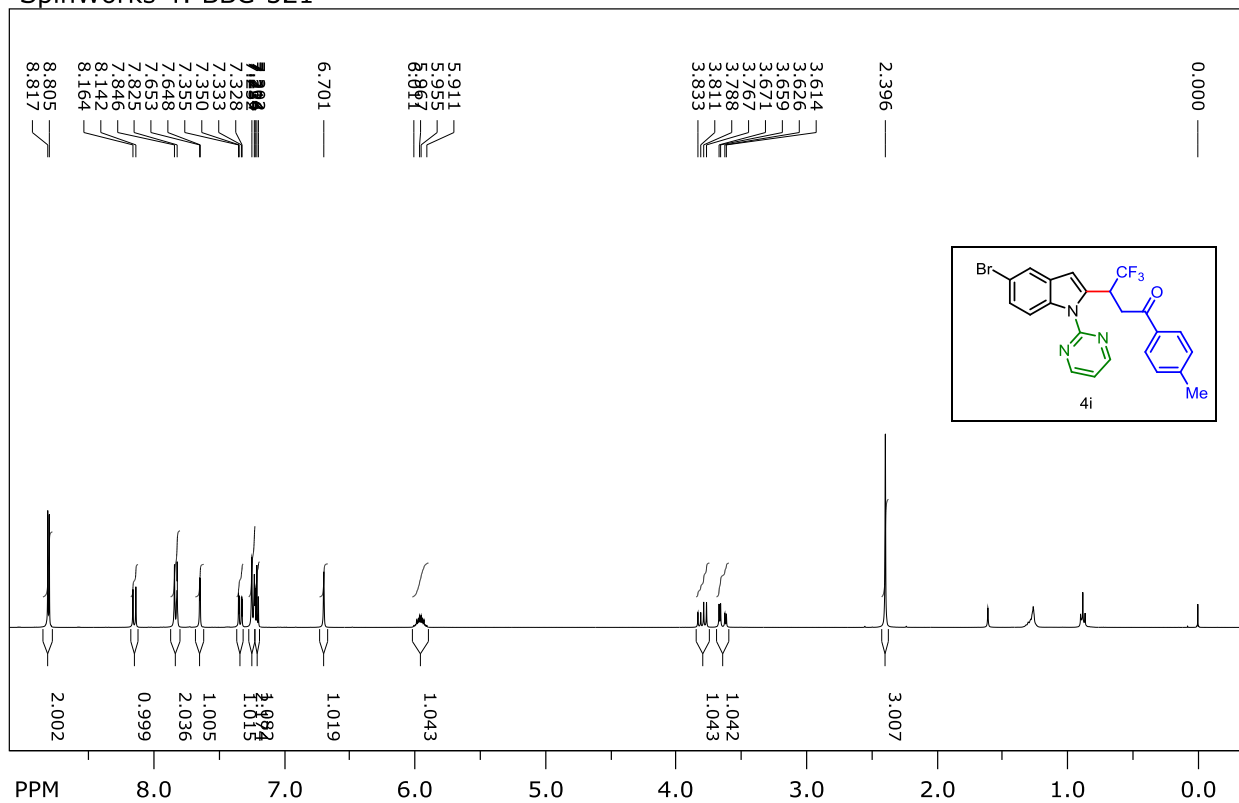

SpinWorks 4: BBC-521

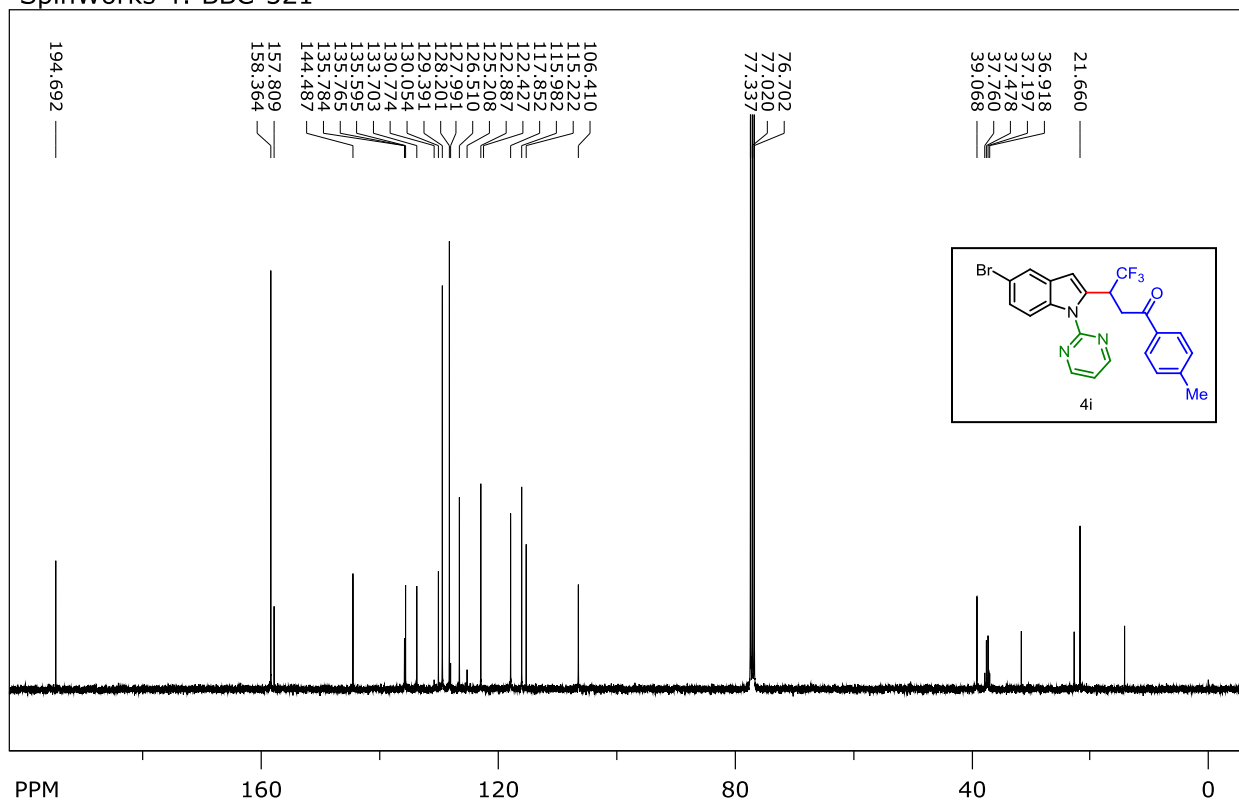

SpinWorks 4: BBC-520

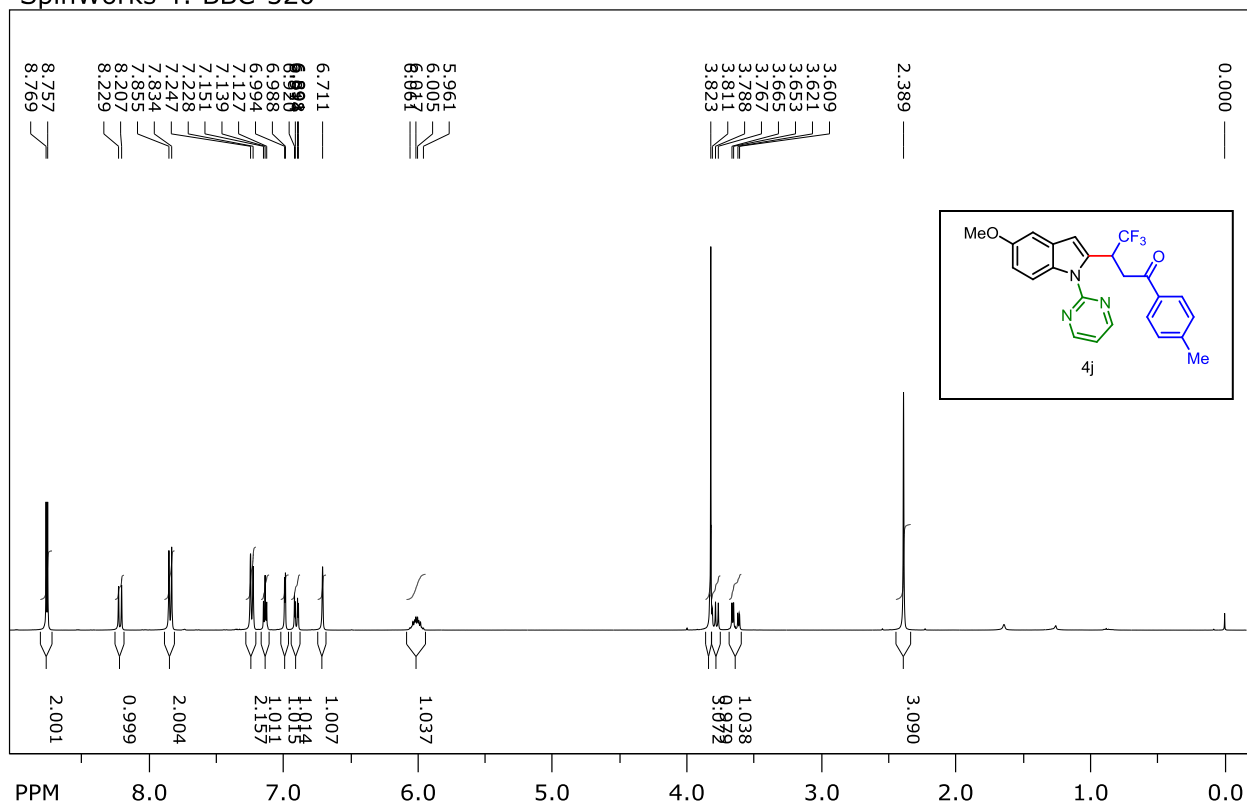

SpinWorks 4: BBC-520

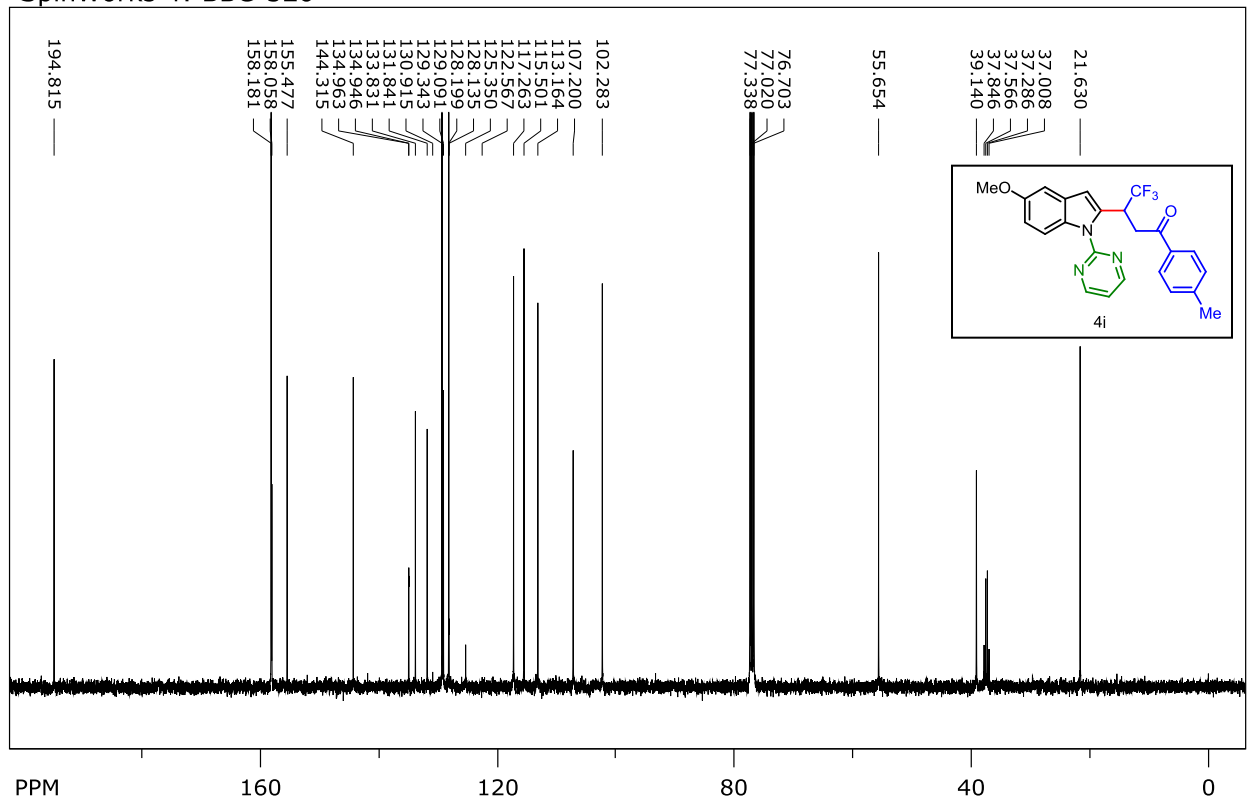



SpinWorks 4: BBC-524

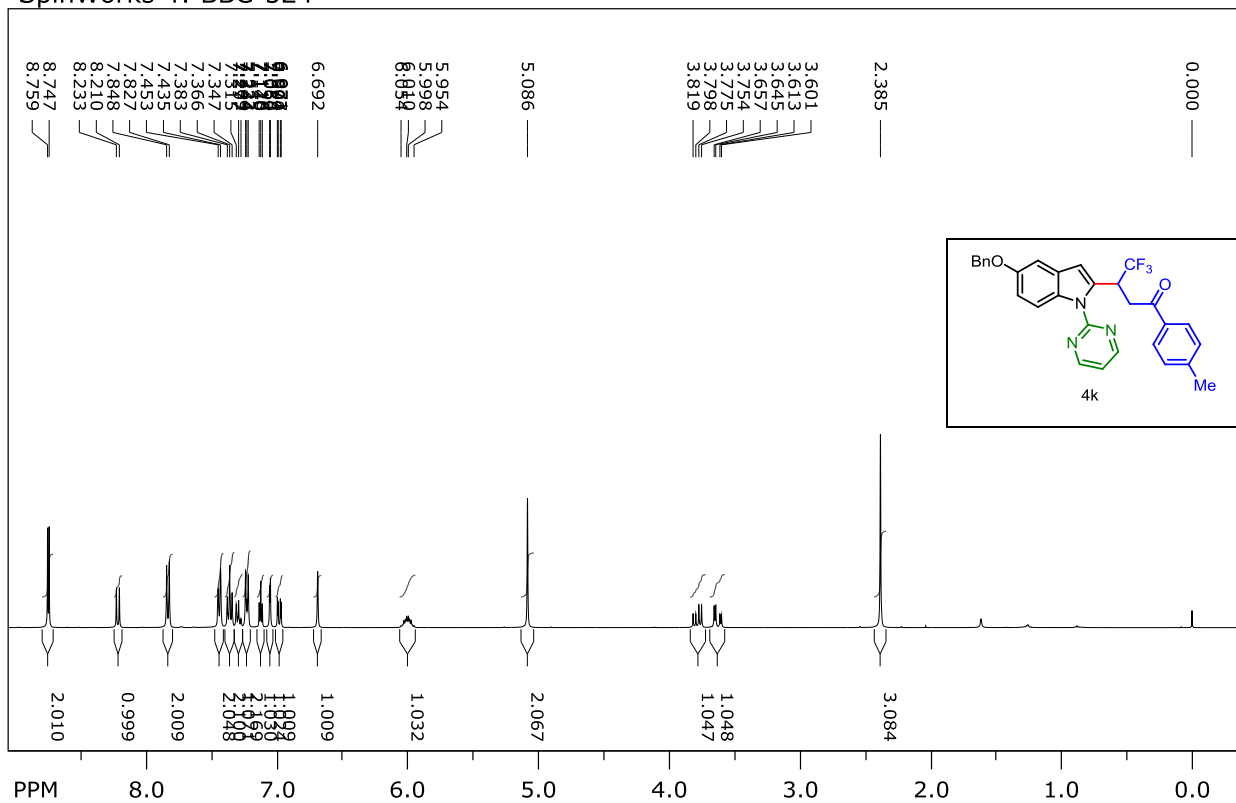

SpinWorks 4: BBC-524

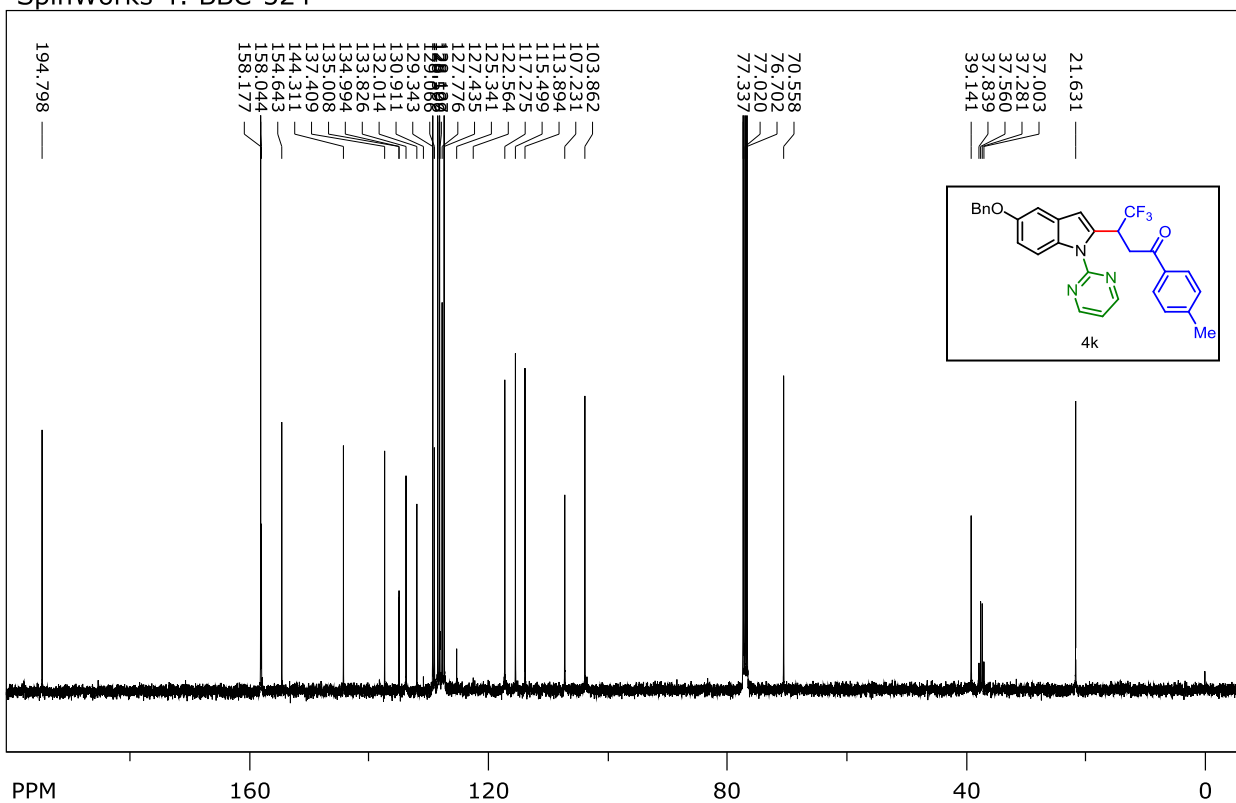

SpinWorks 4: BBC-519

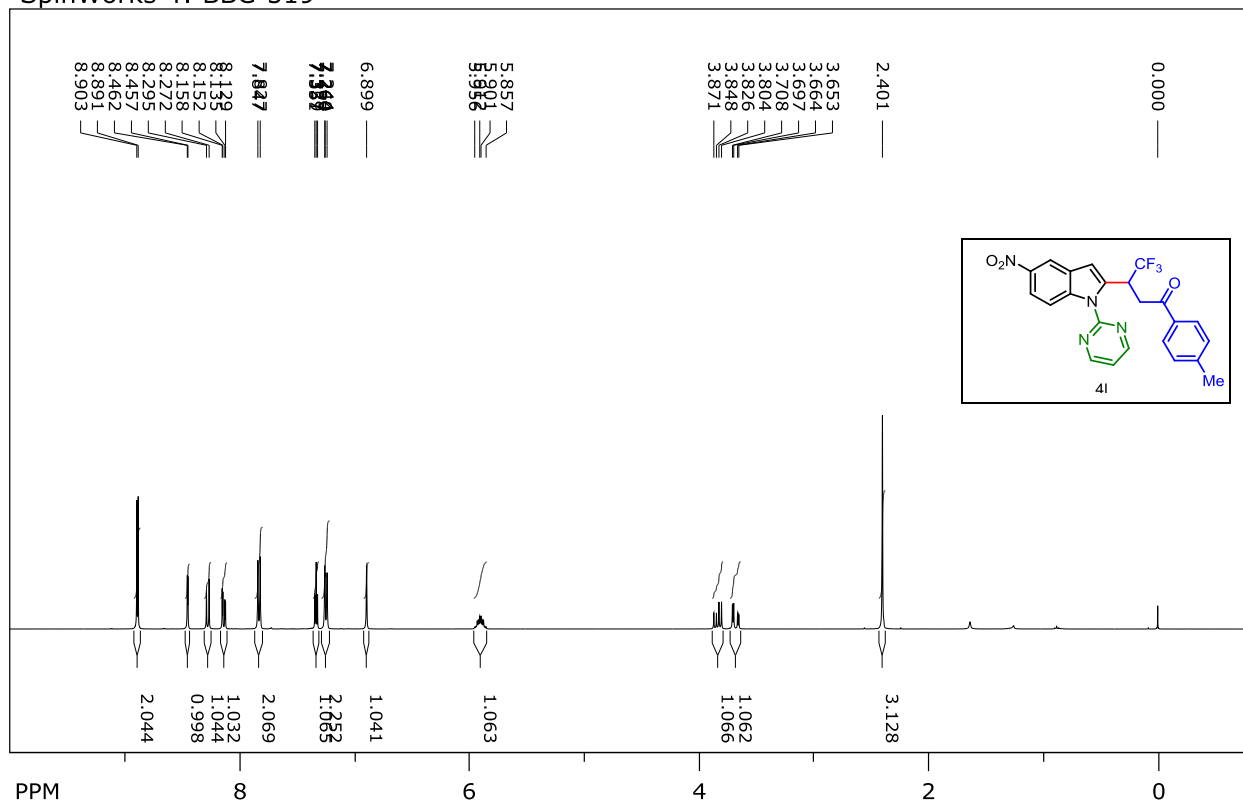

SpinWorks 4: BBC-519

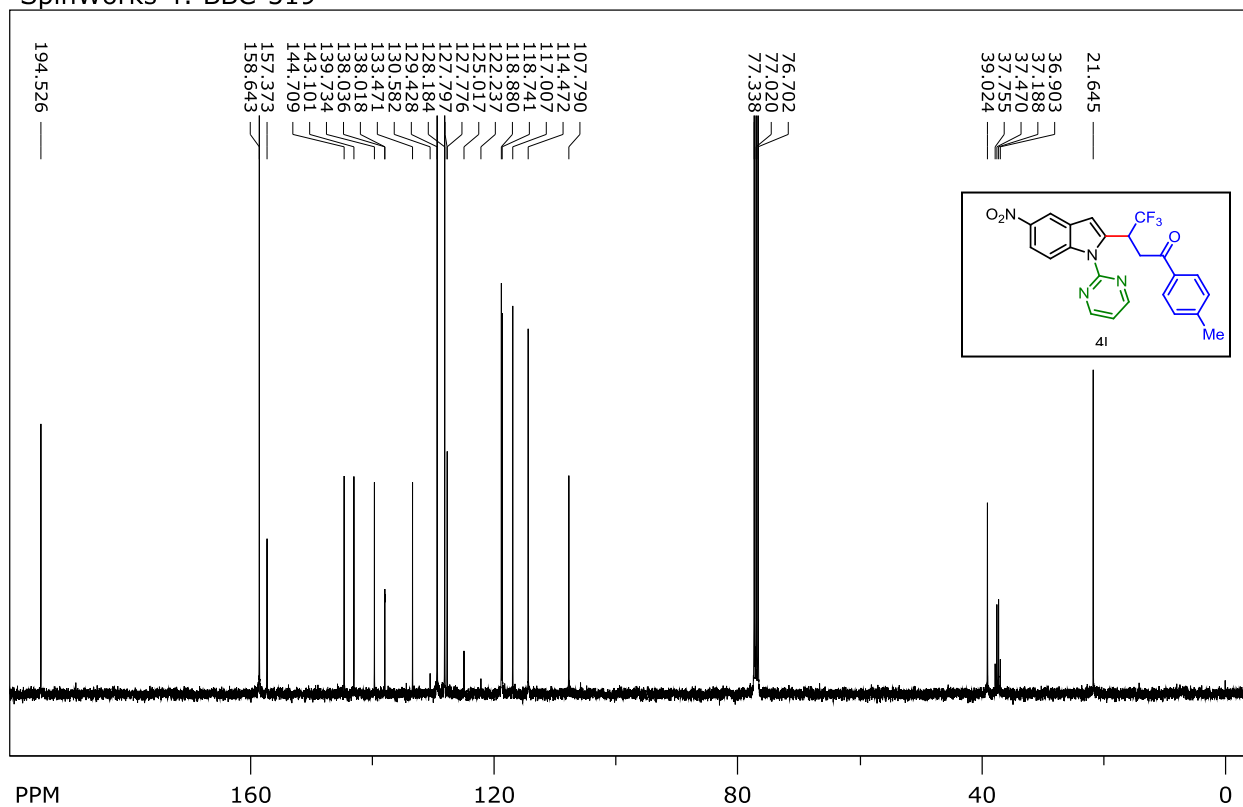

SpinWorks 4: BBC-527

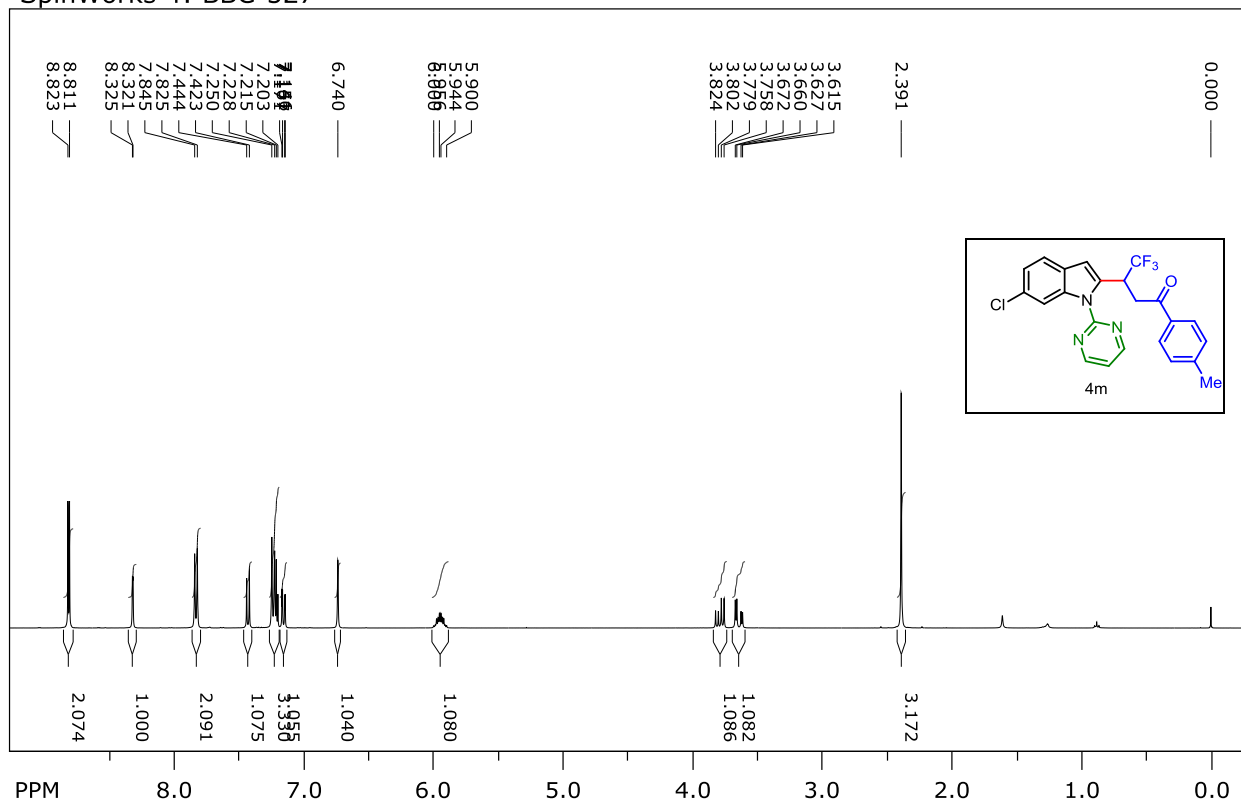

SpinWorks 4: BBC-527

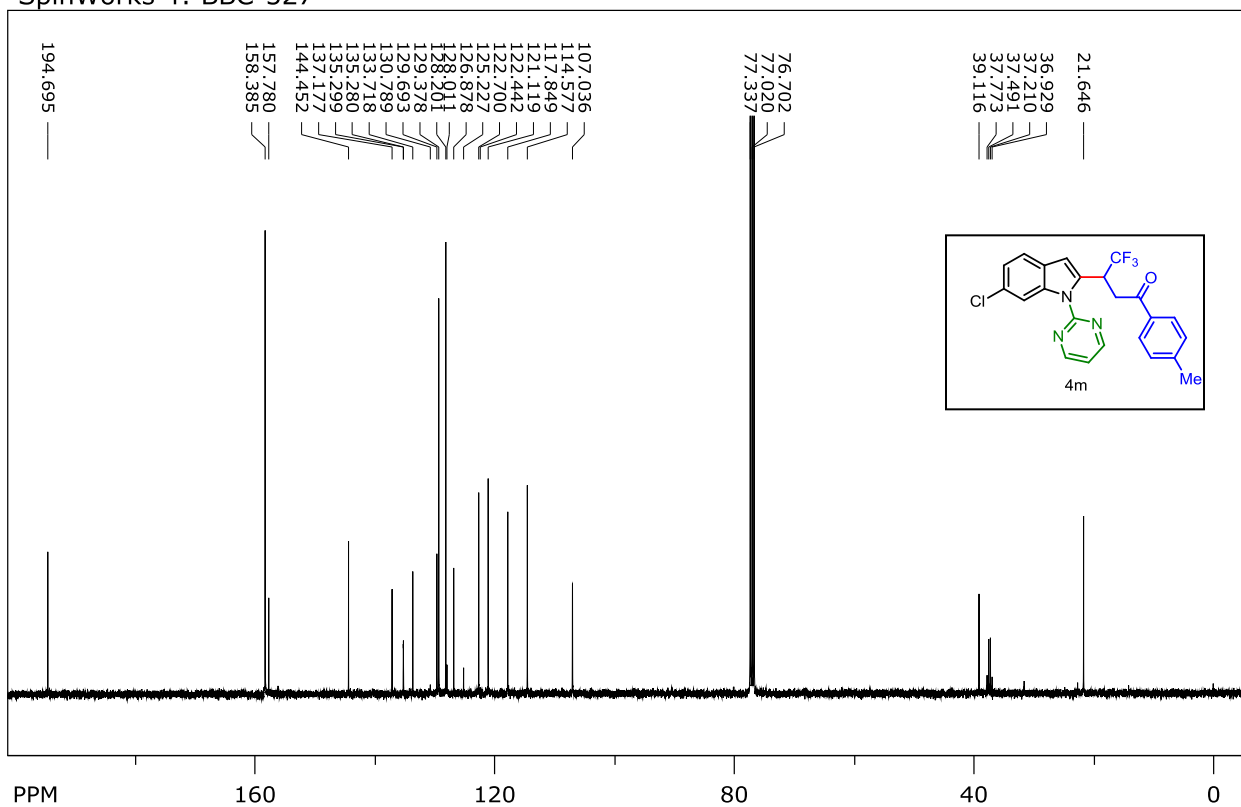

SpinWorks 4: BBC-525

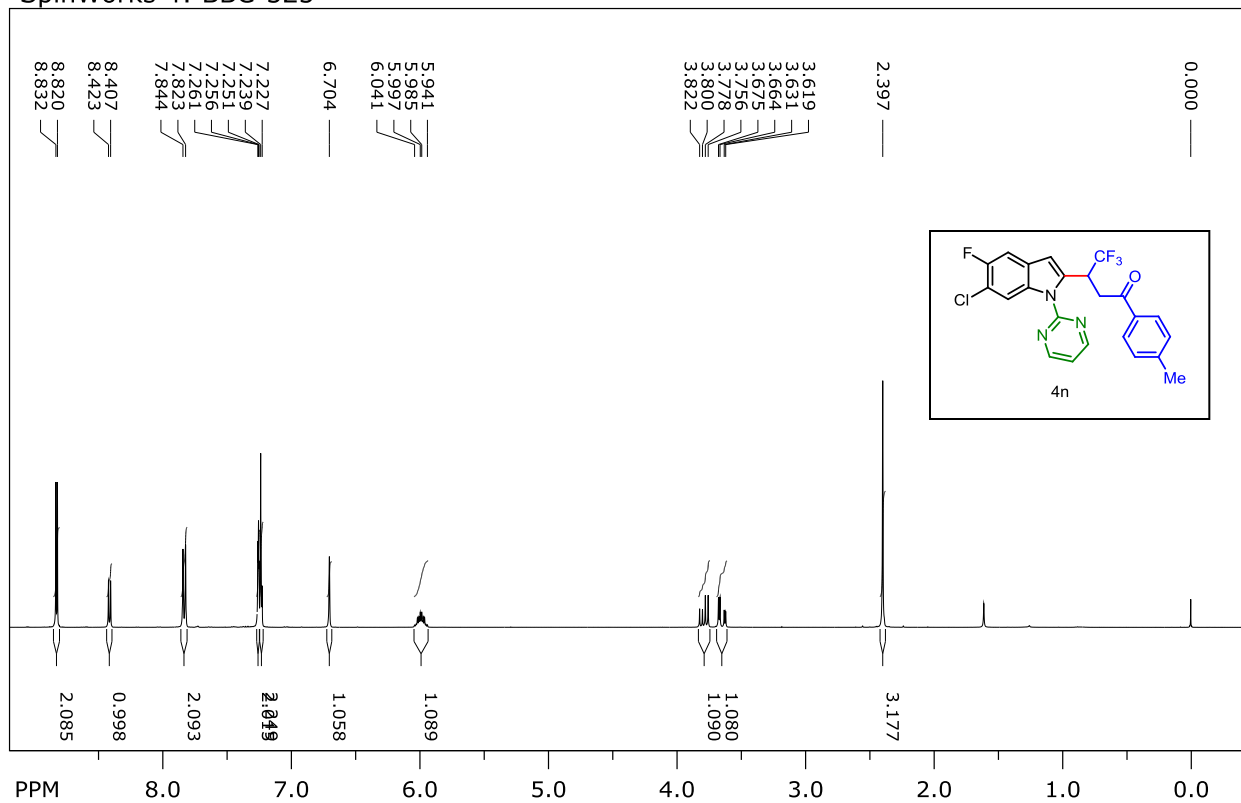

SpinWorks 4: BBC-525

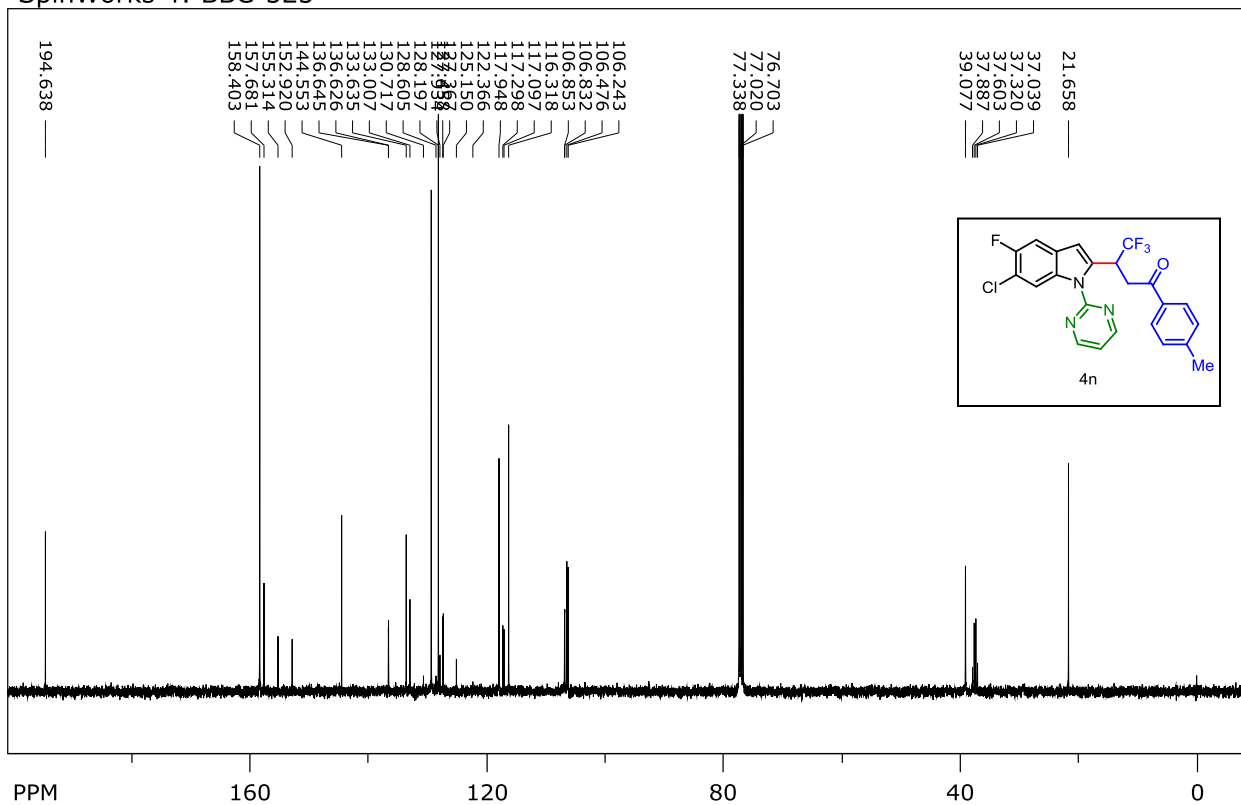

SpinWorks 4: BBC-827

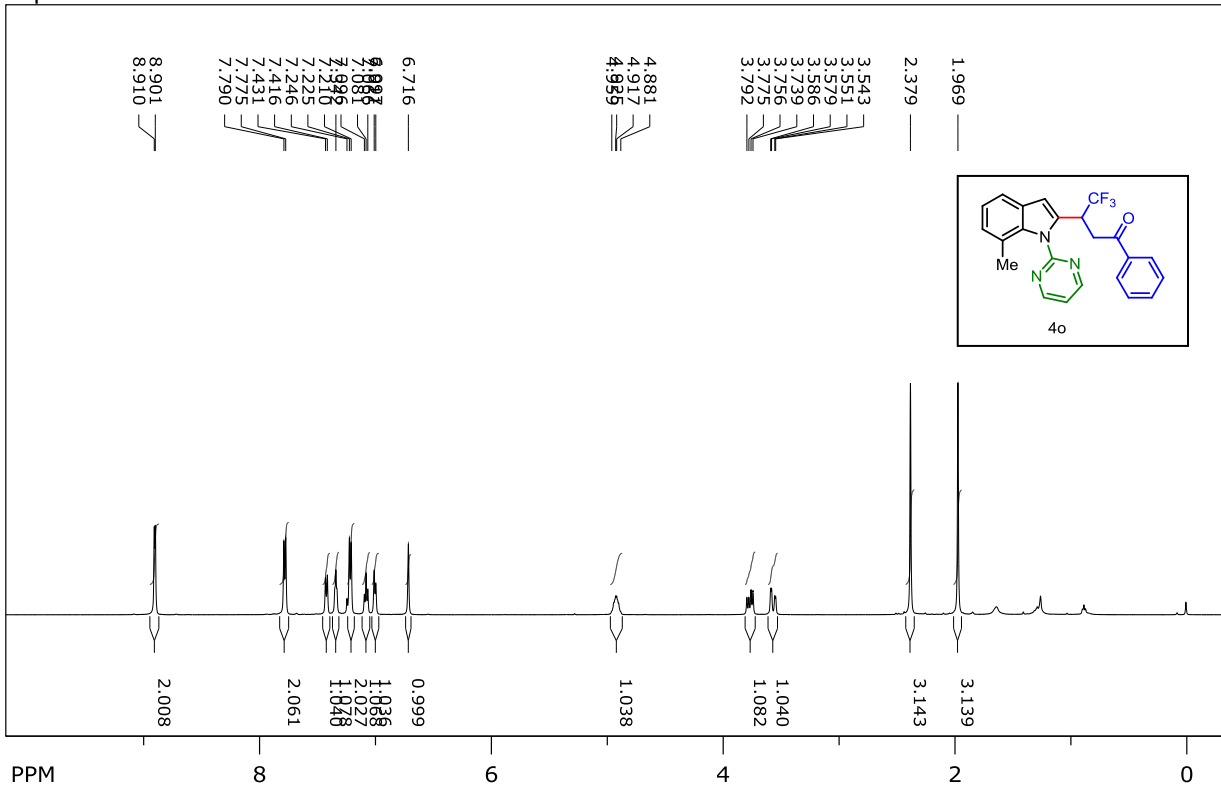

SpinWorks 4: BBC-827

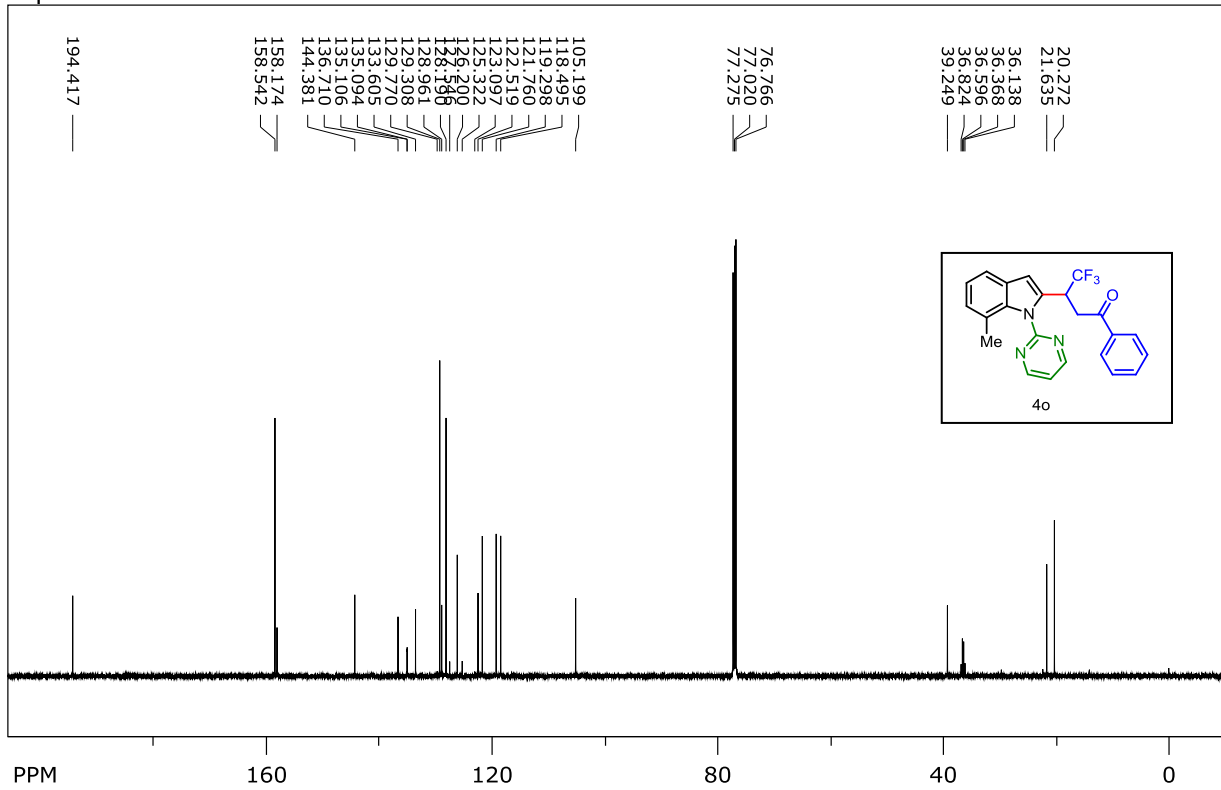

SpinWorks 4: BBC-539

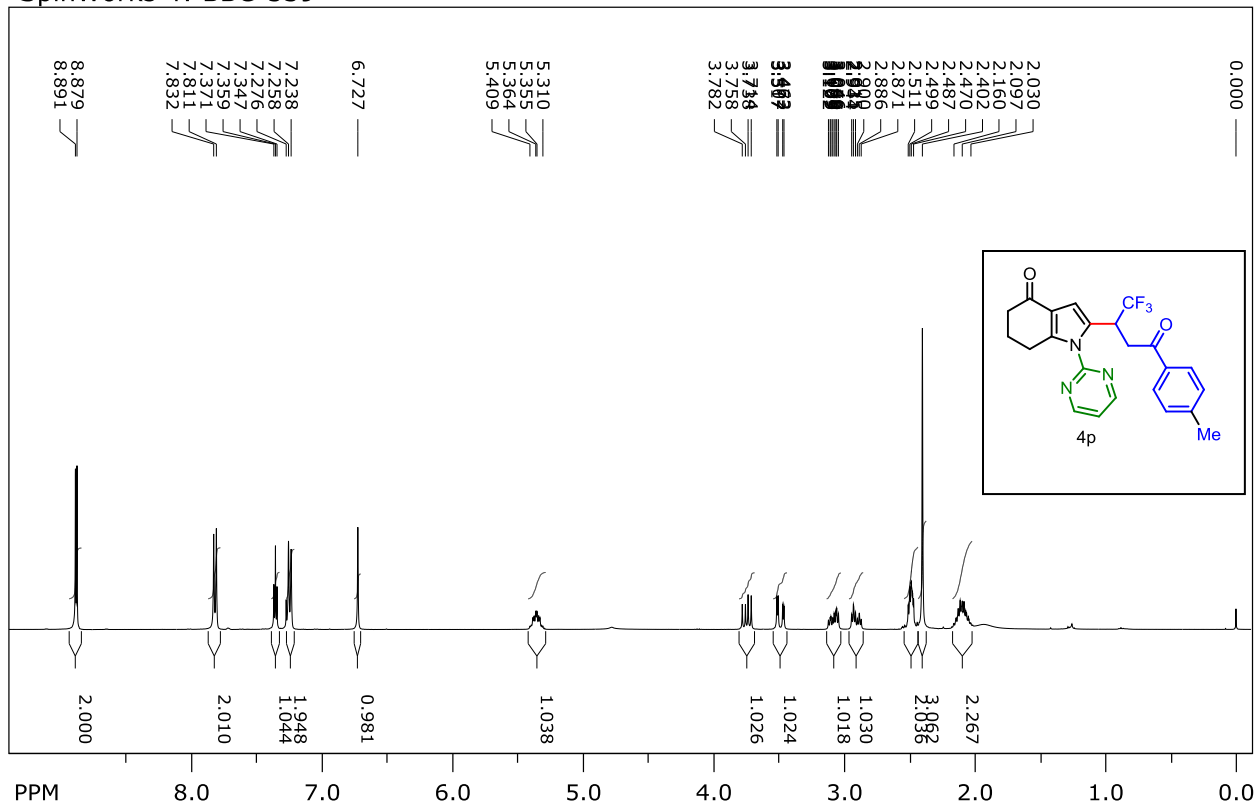

SpinWorks 4: BBC-539

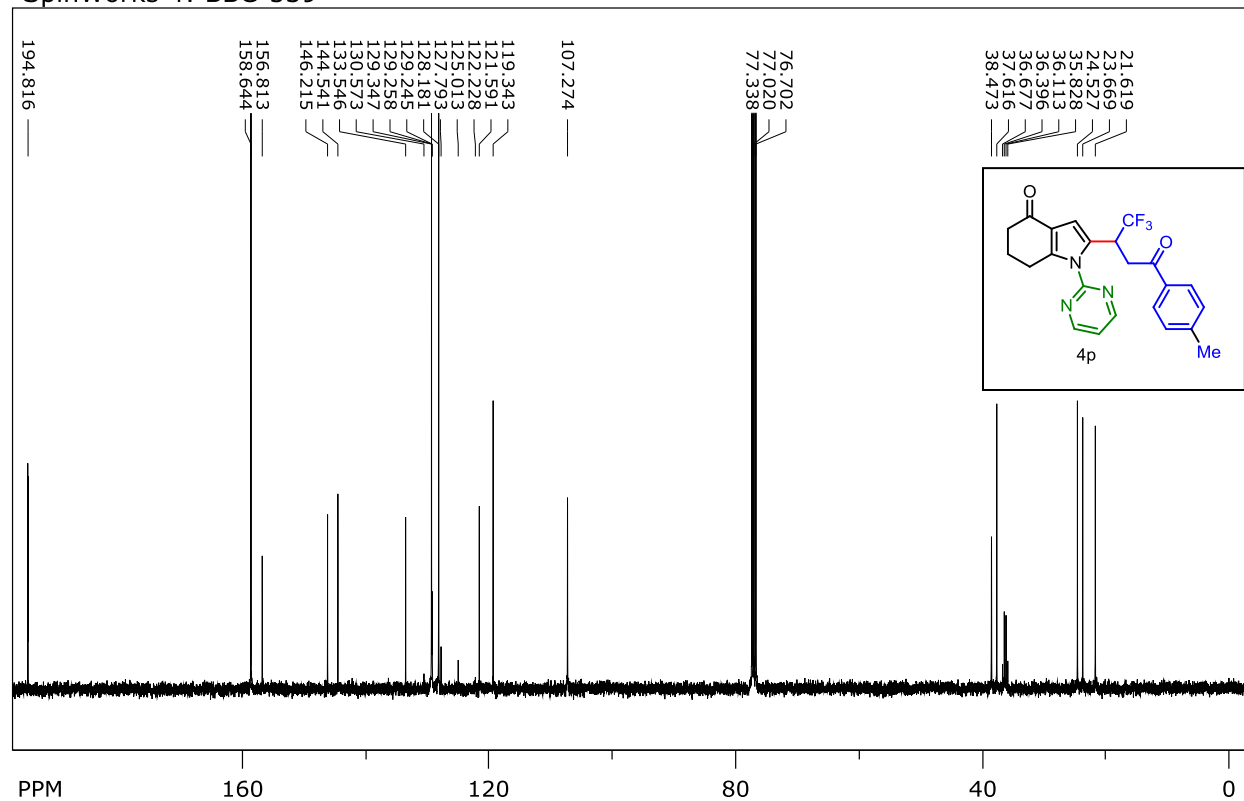

SpinWorks 4: BBC-551

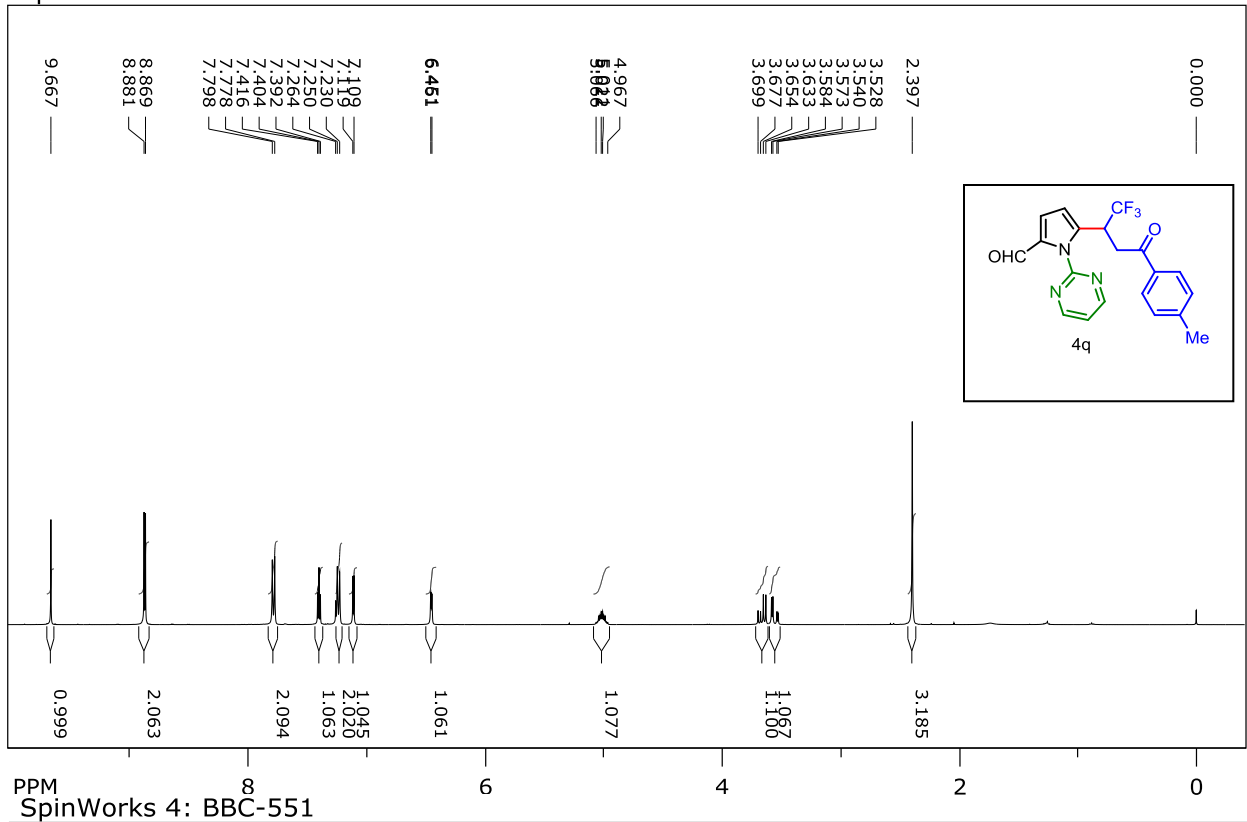

SpinWorks 4: BBC-551

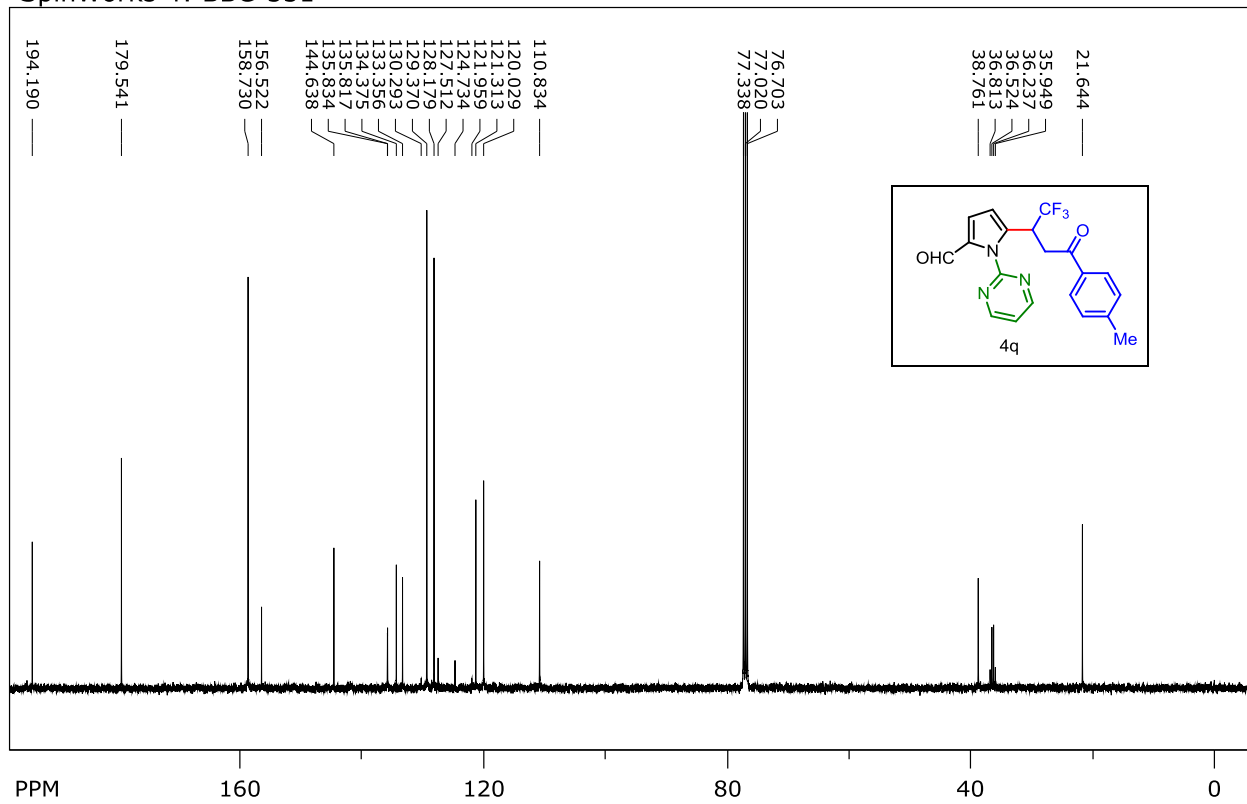

SpinWorks 4: BBC-540

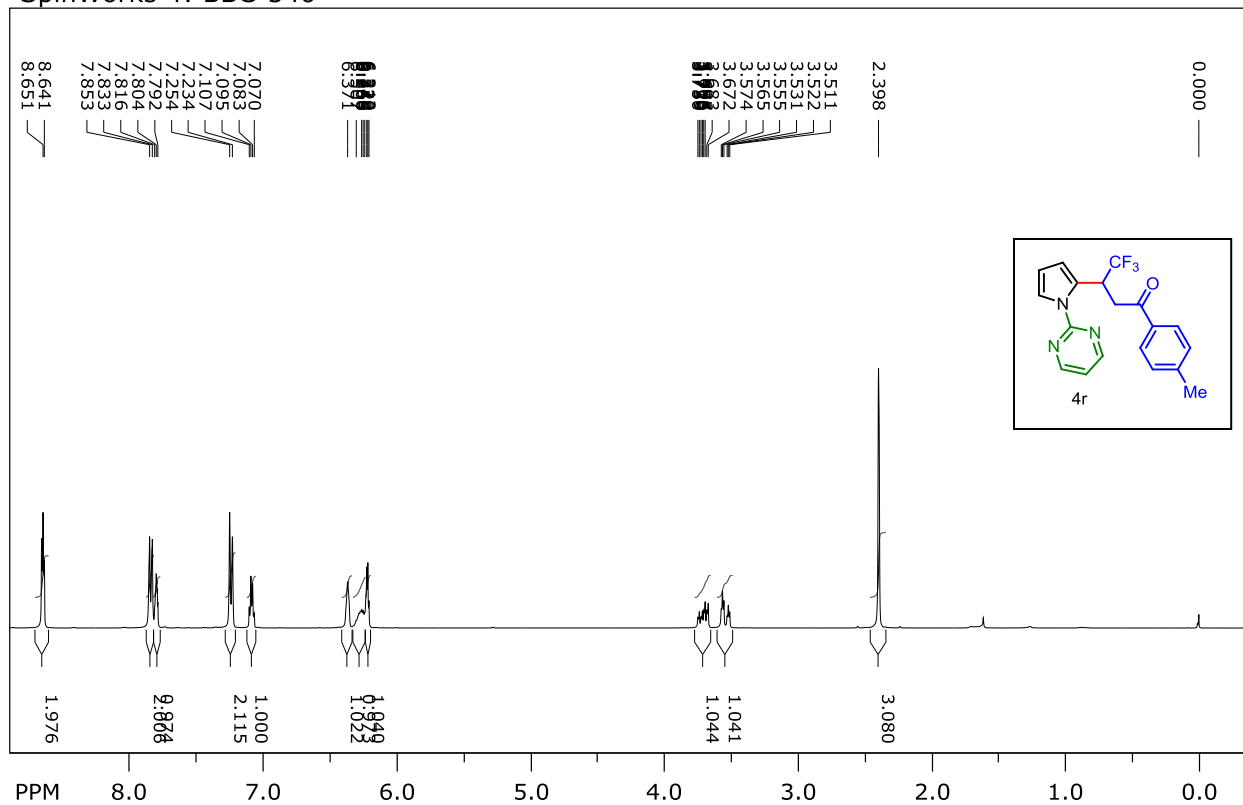

SpinWorks 4: BBC-540

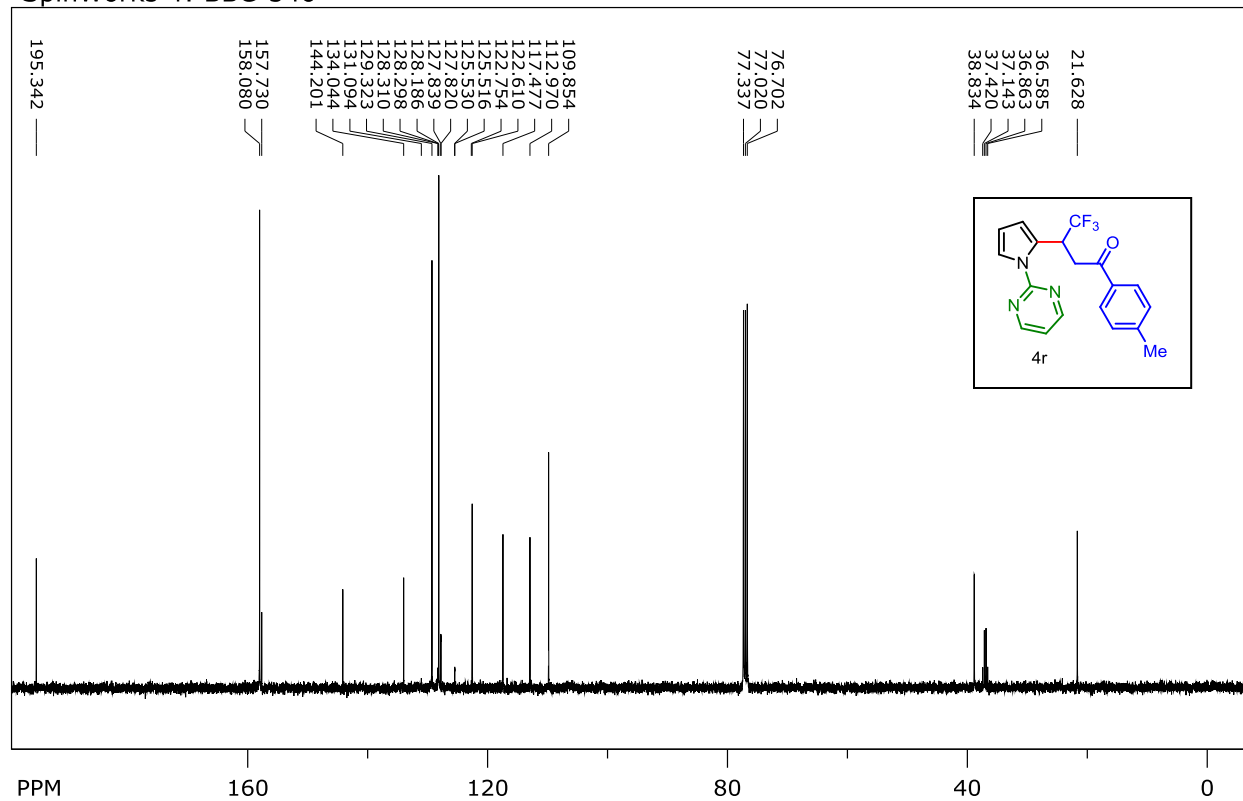



SpinWorks 4: BBC-550 A

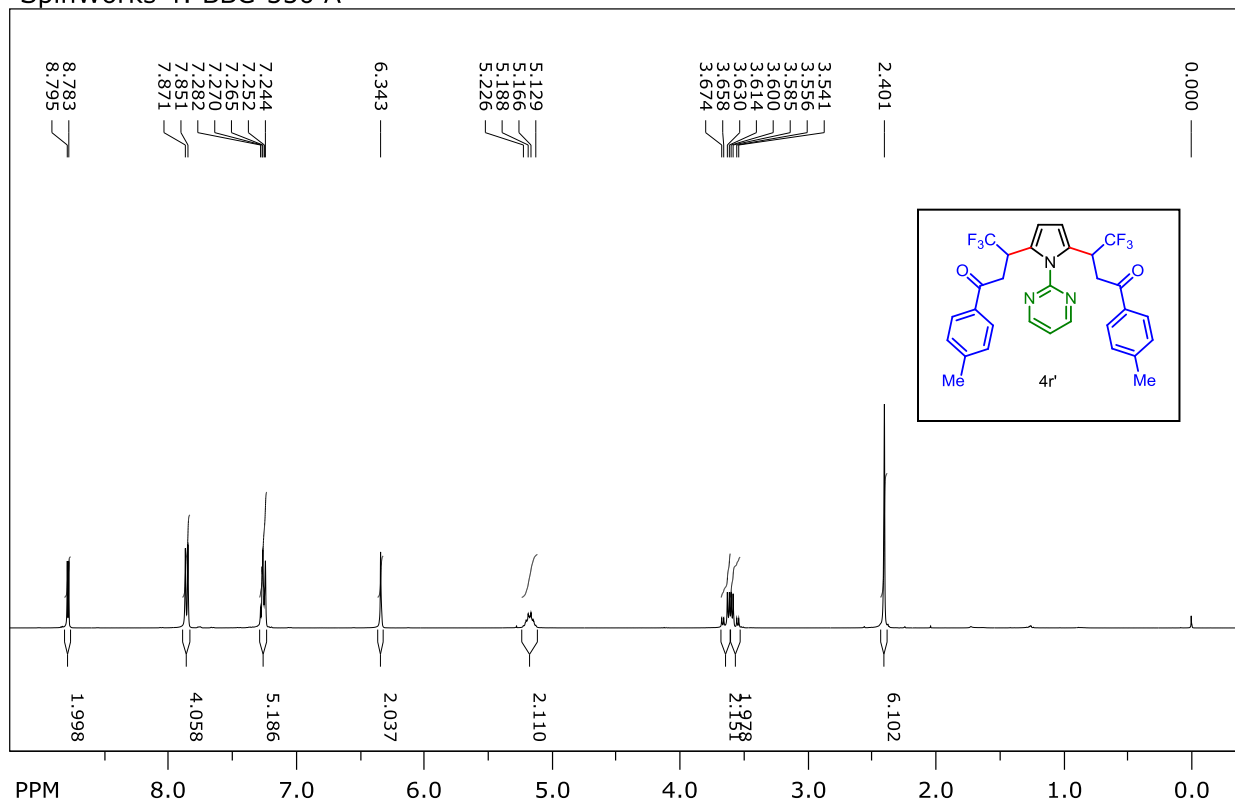

SpinWorks 4: BBC-550 A

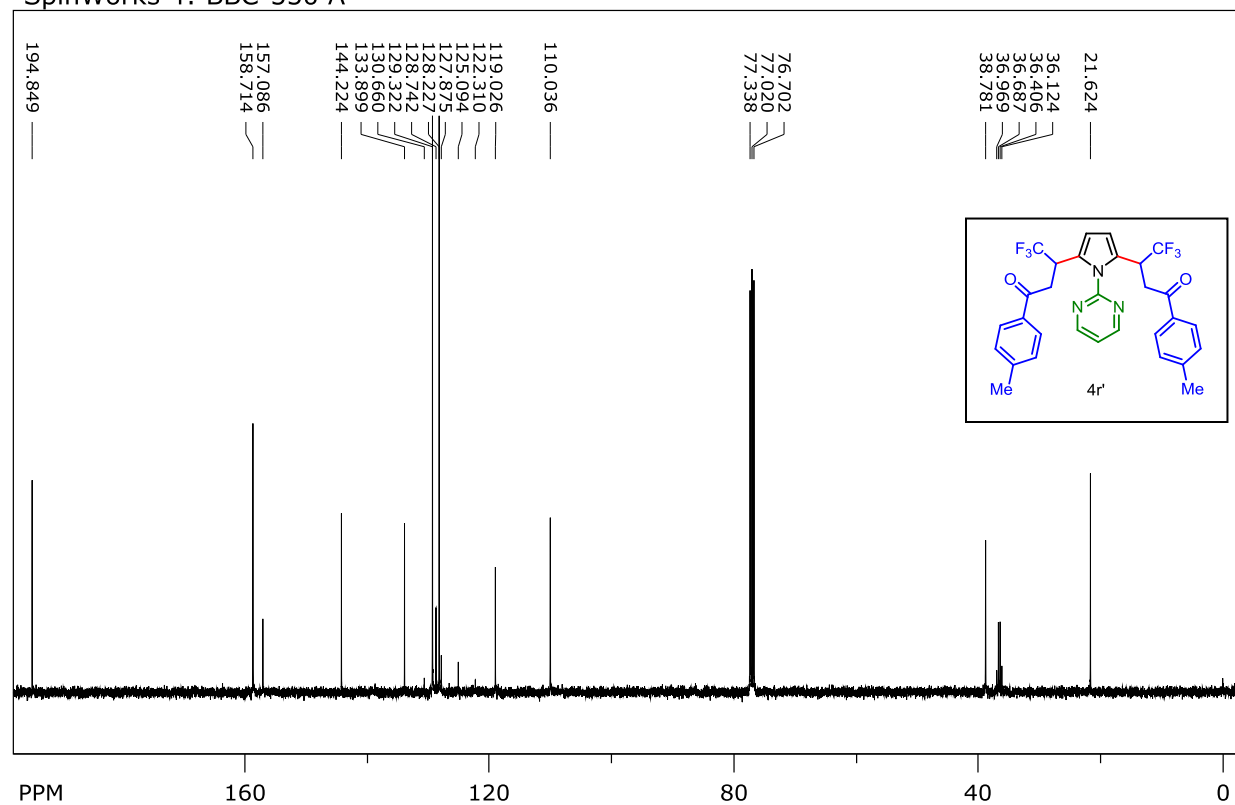

SpinWorks 4: BBC-616B

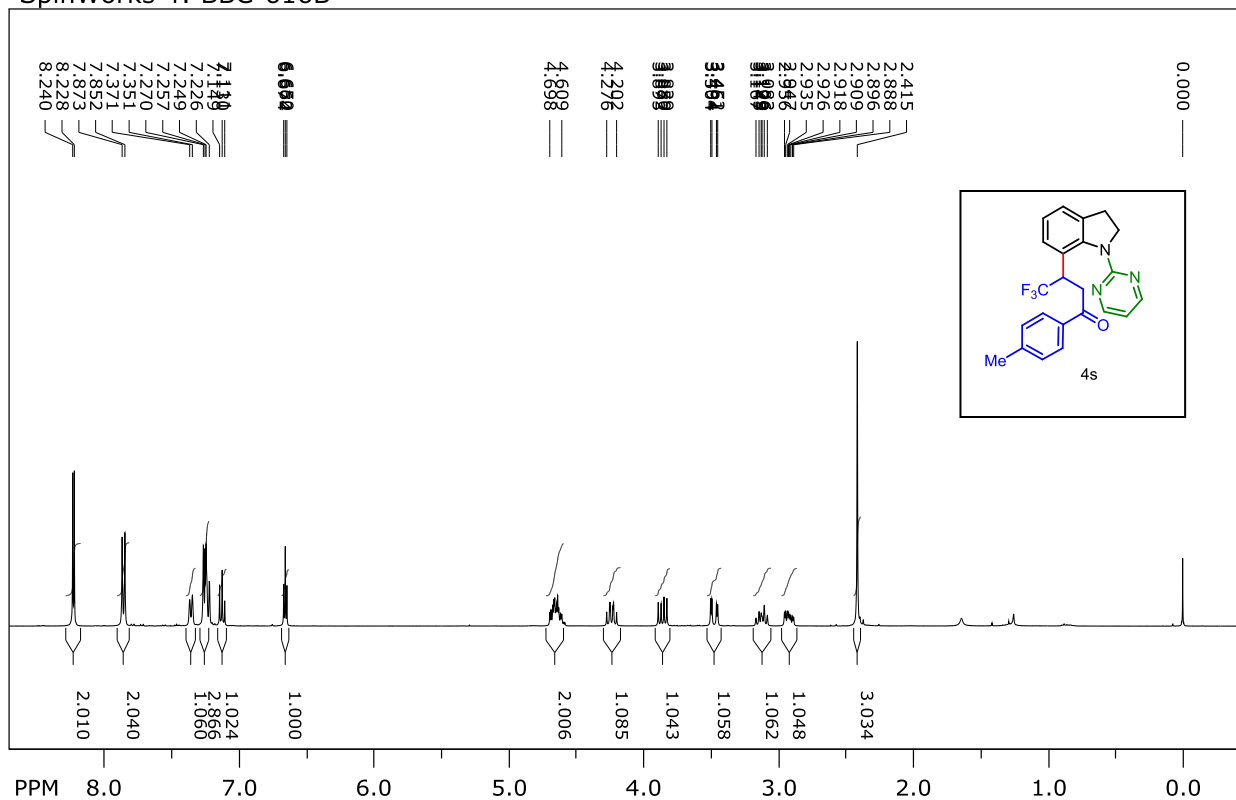

SpinWorks 4: BBC-616B

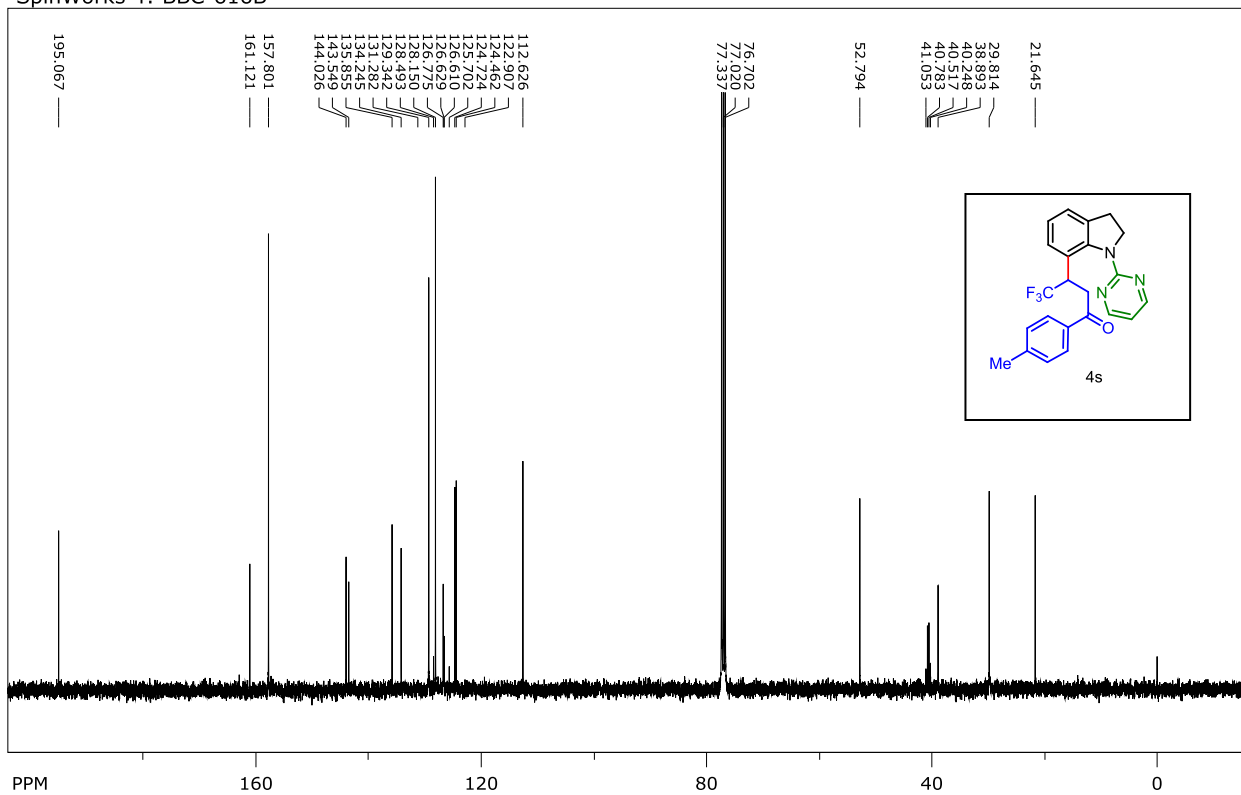

SpinWorks 4: BBC-450-B

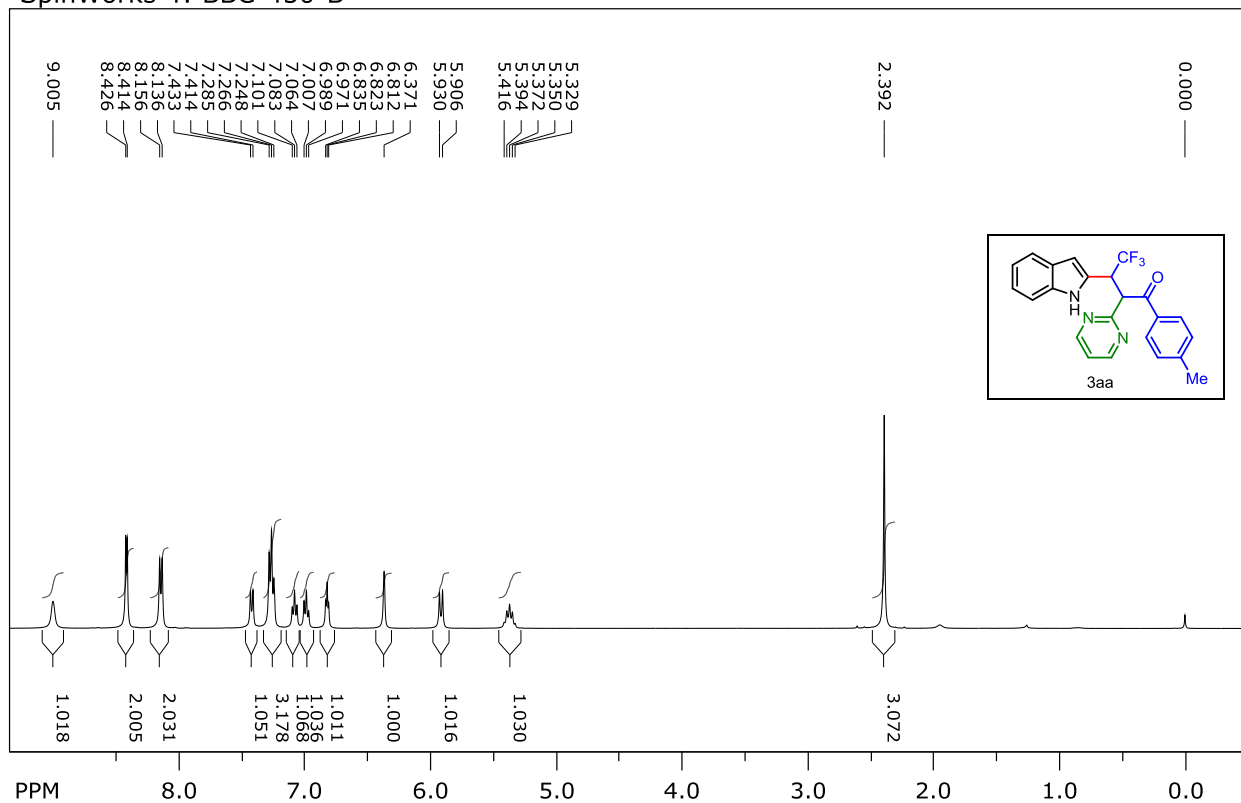

SpinWorks 4: BBC-450-B

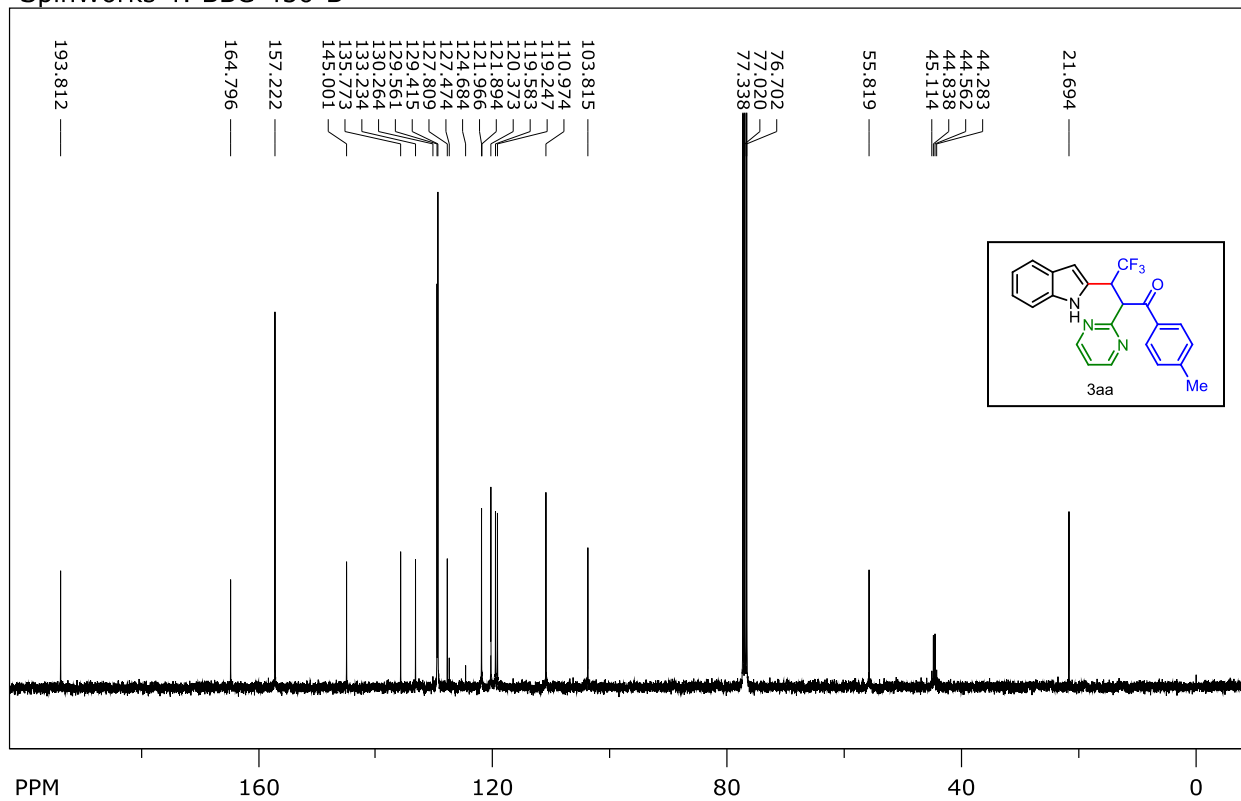

SpinWorks 4: BBC-642B-1HNMR

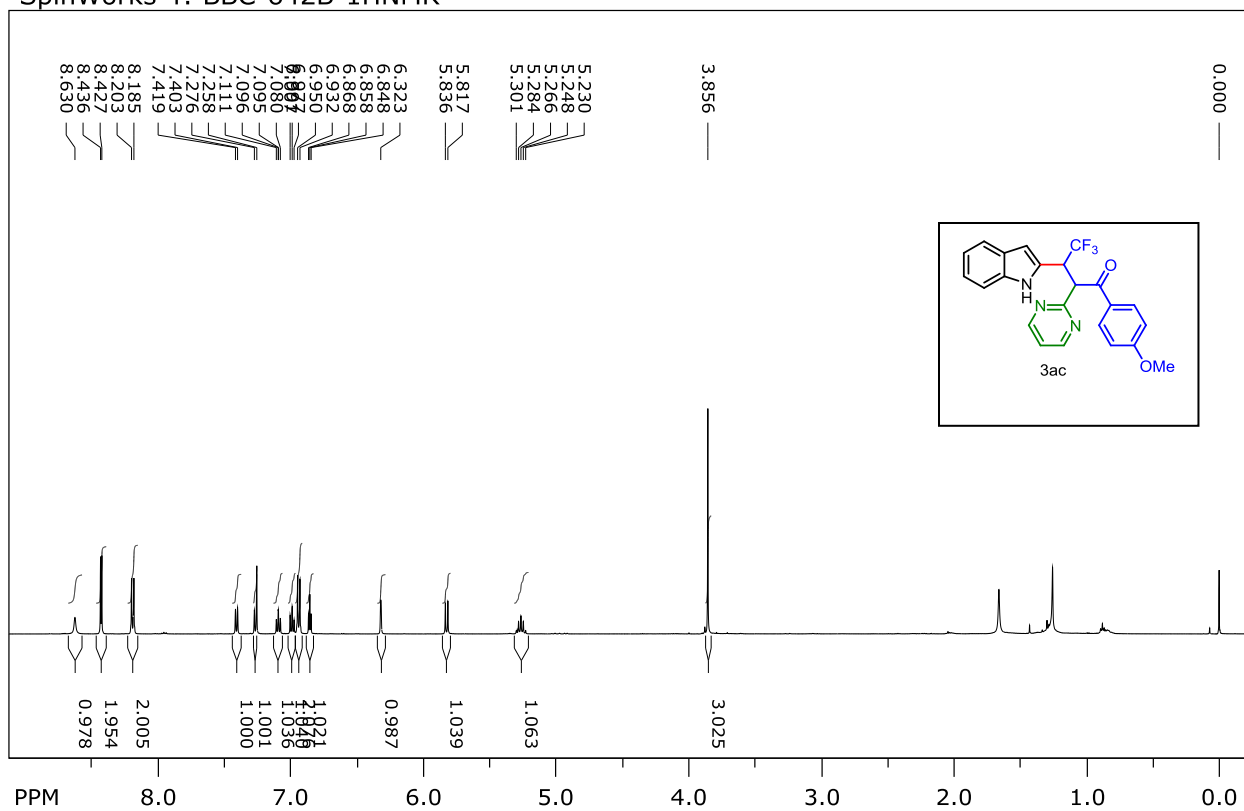

SpinWorks 4: BBC-642B-13CNMR

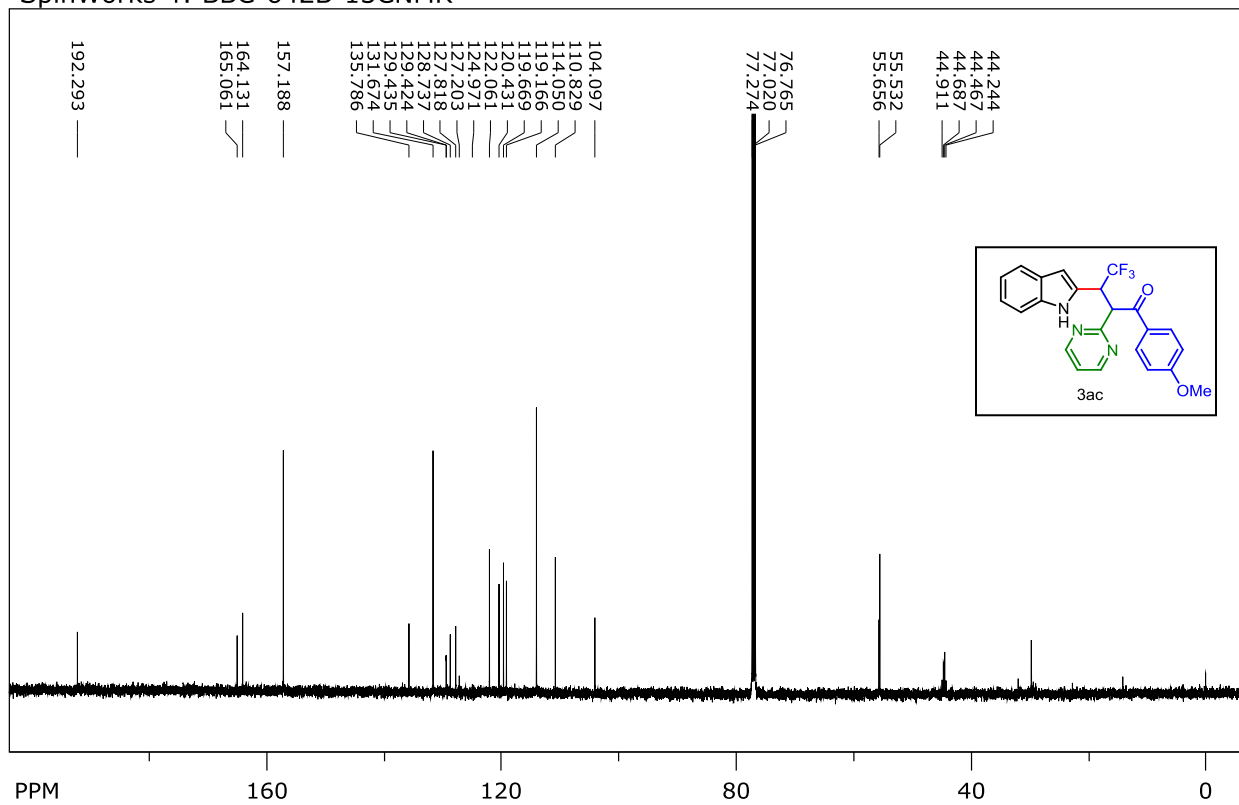

SpinWorks 4: BBC-495-B

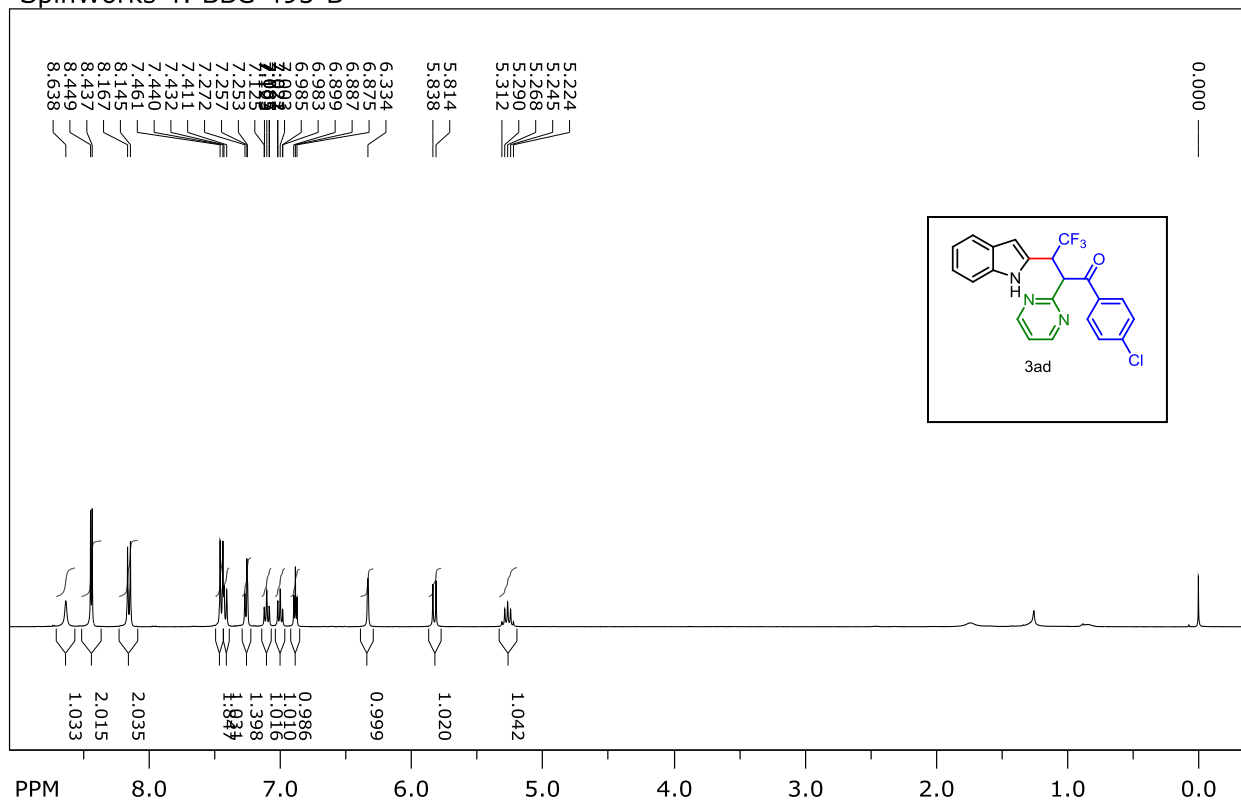

SpinWorks 4: BBC-495-B

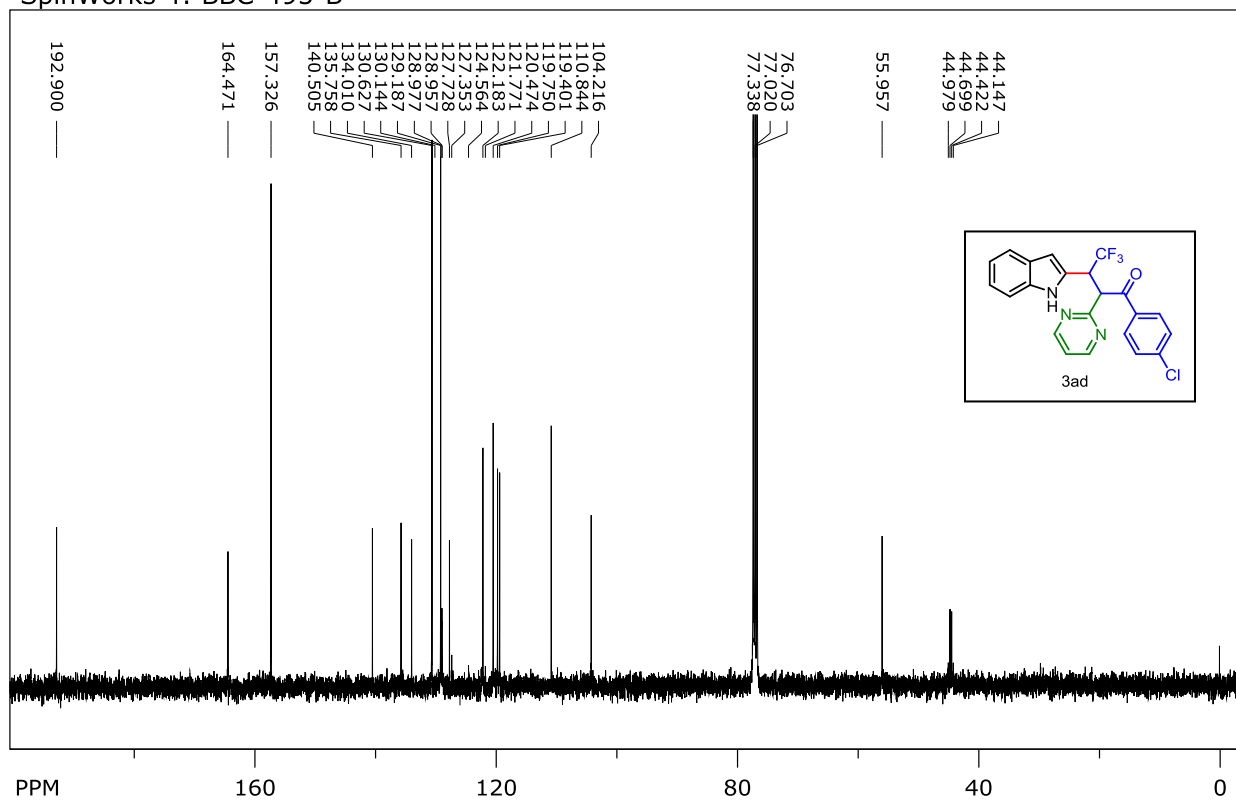

SpinWorks 4: BBC-643B-1HNMR

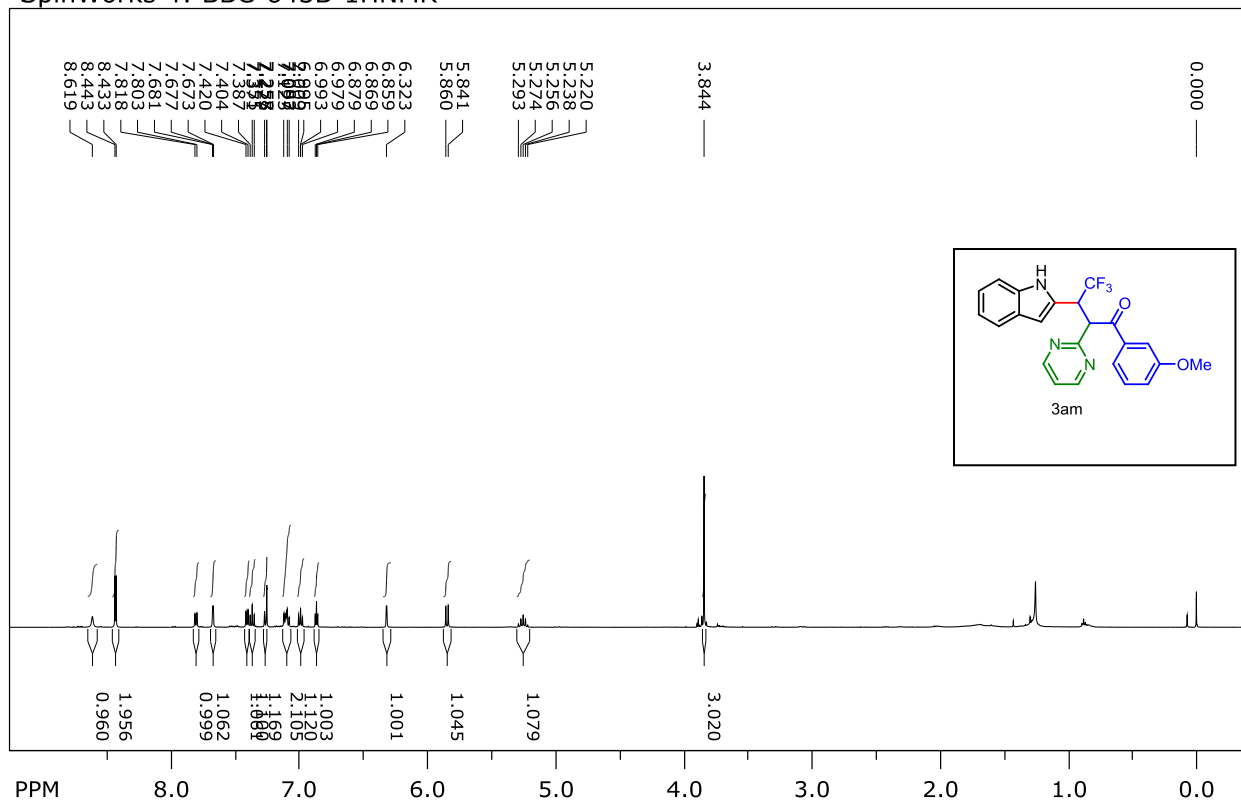

SpinWorks 4: BBC-643B-13CNMR

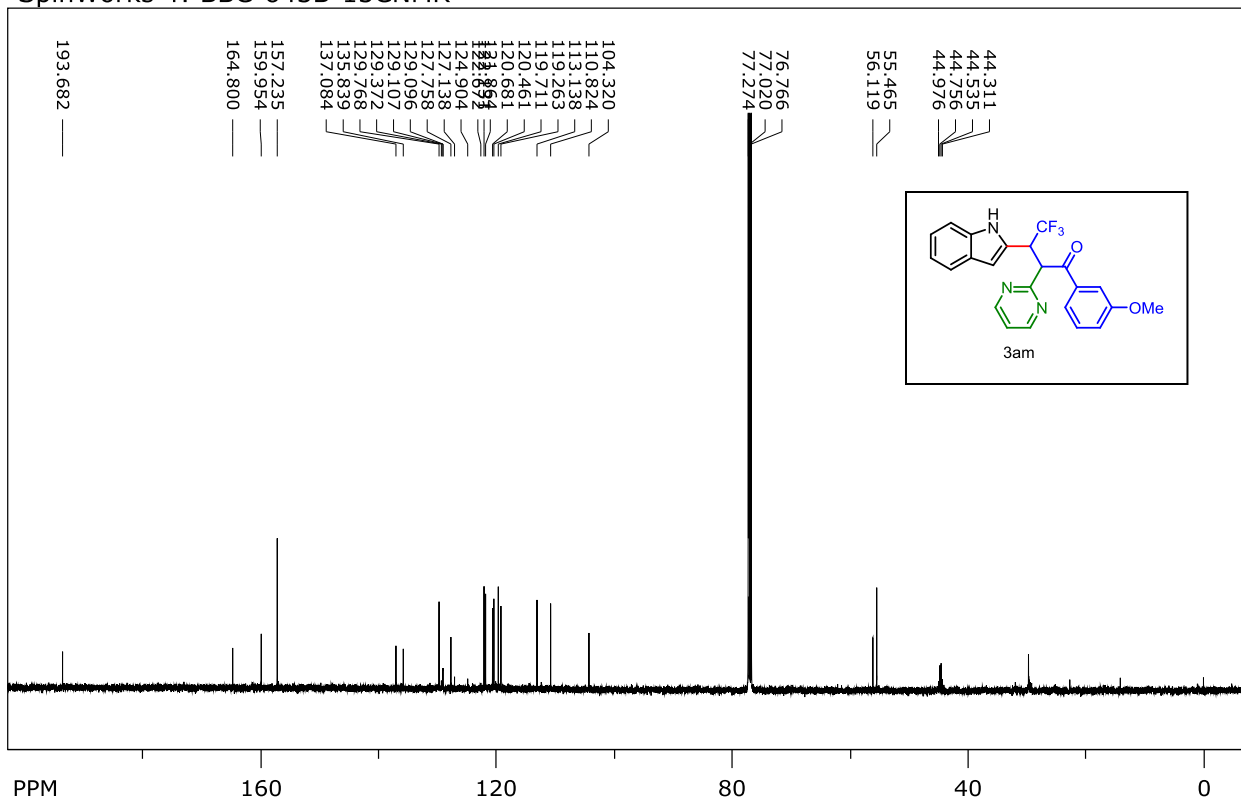

SpinWorks 4: BBC-641-1HNMR

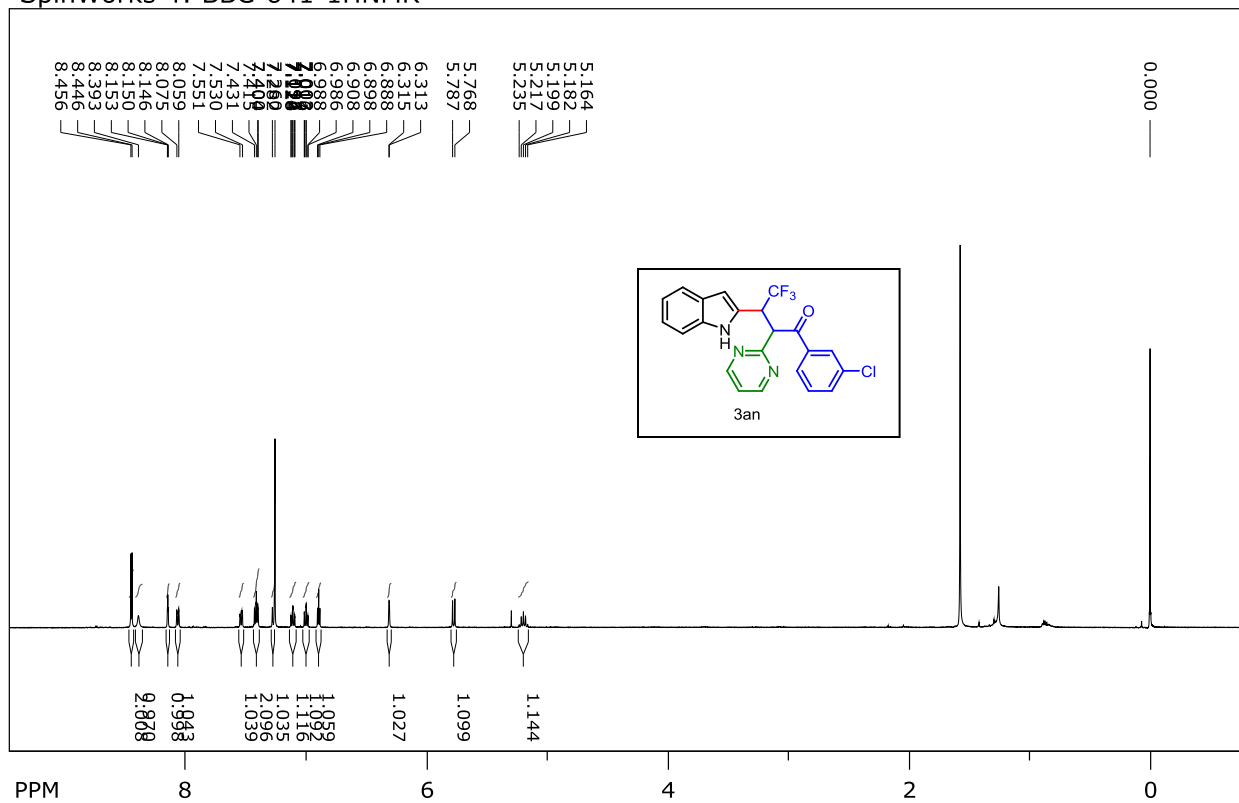

SpinWorks 4: BBC-641-13CNMR

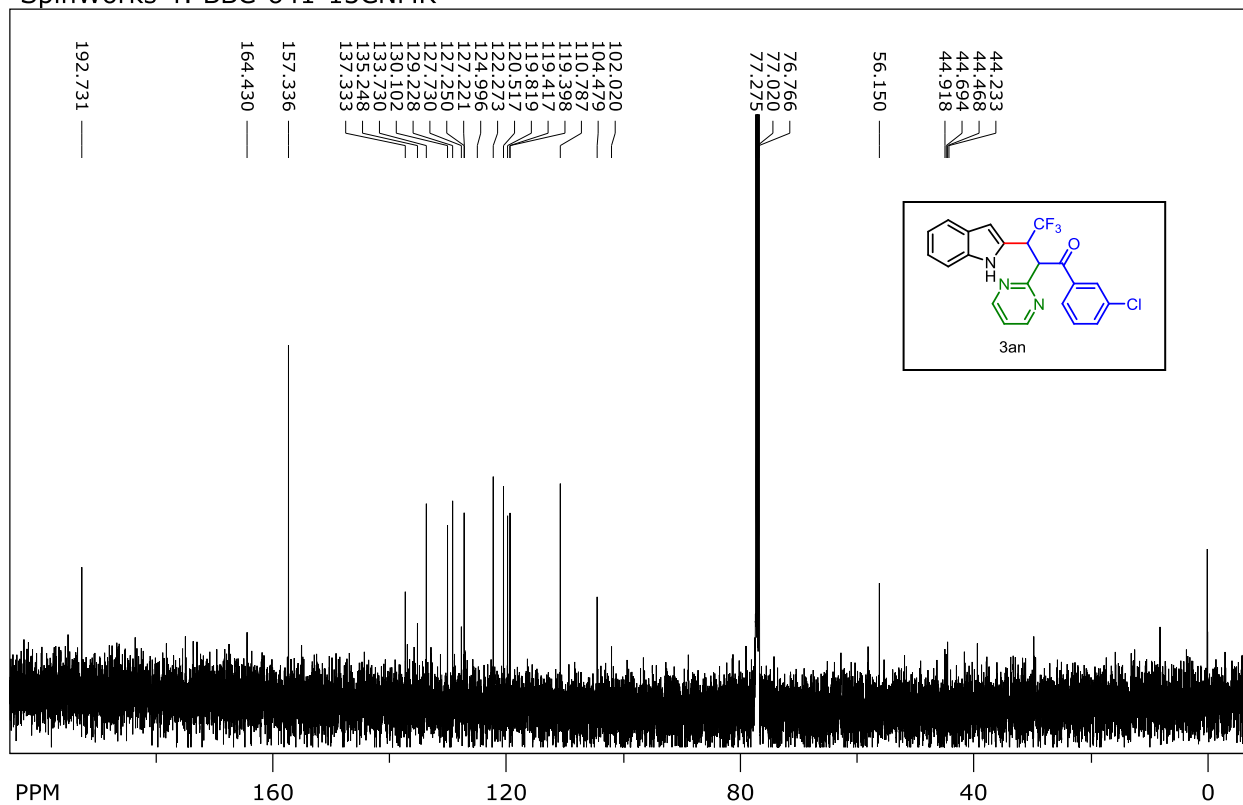

SpinWorks 4: BBC-578-B

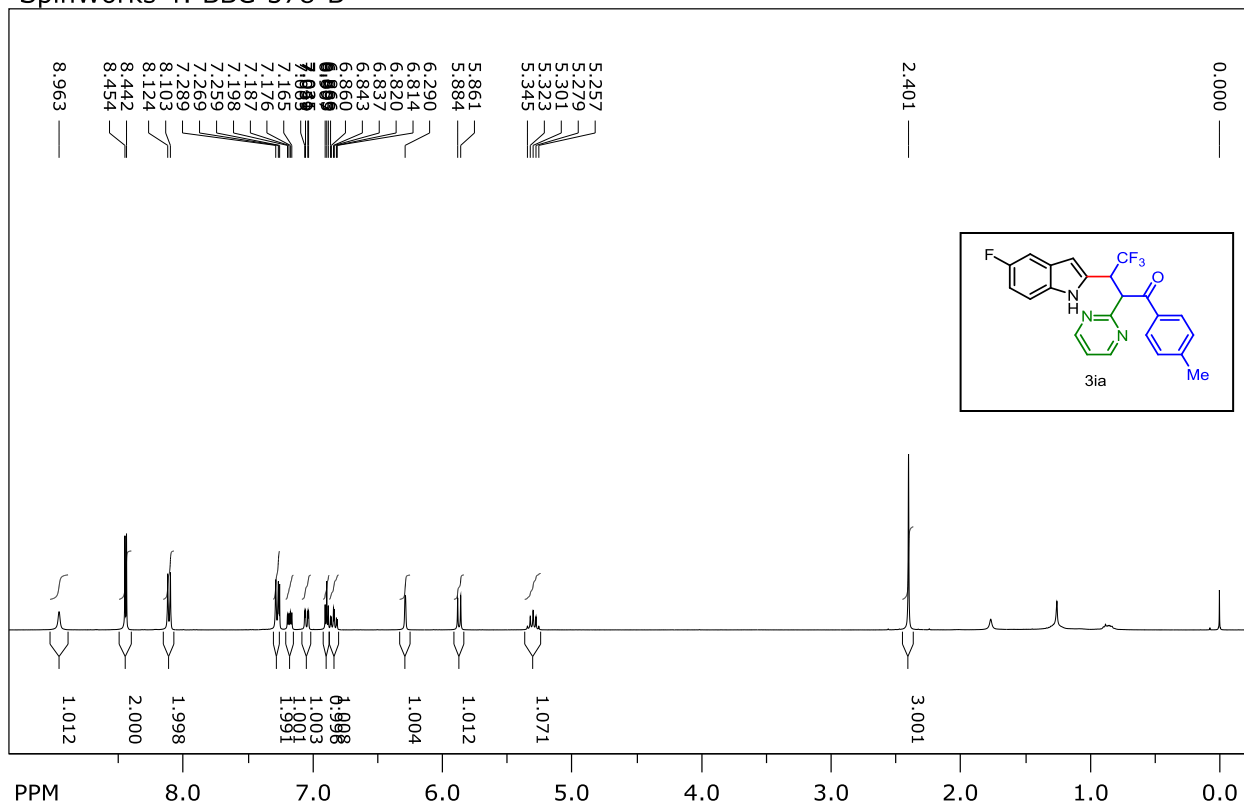

SpinWorks 4: BBC-578-B

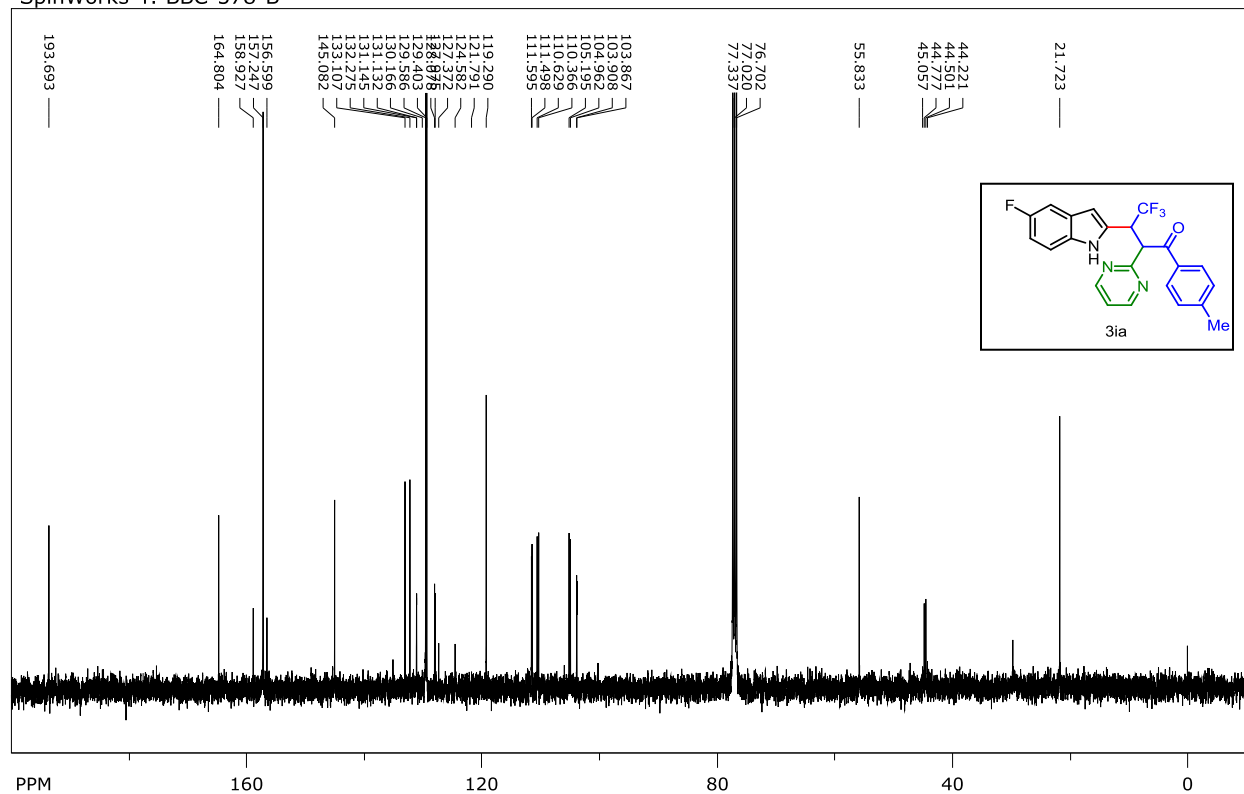



SpinWorks 4: BBC-579 B

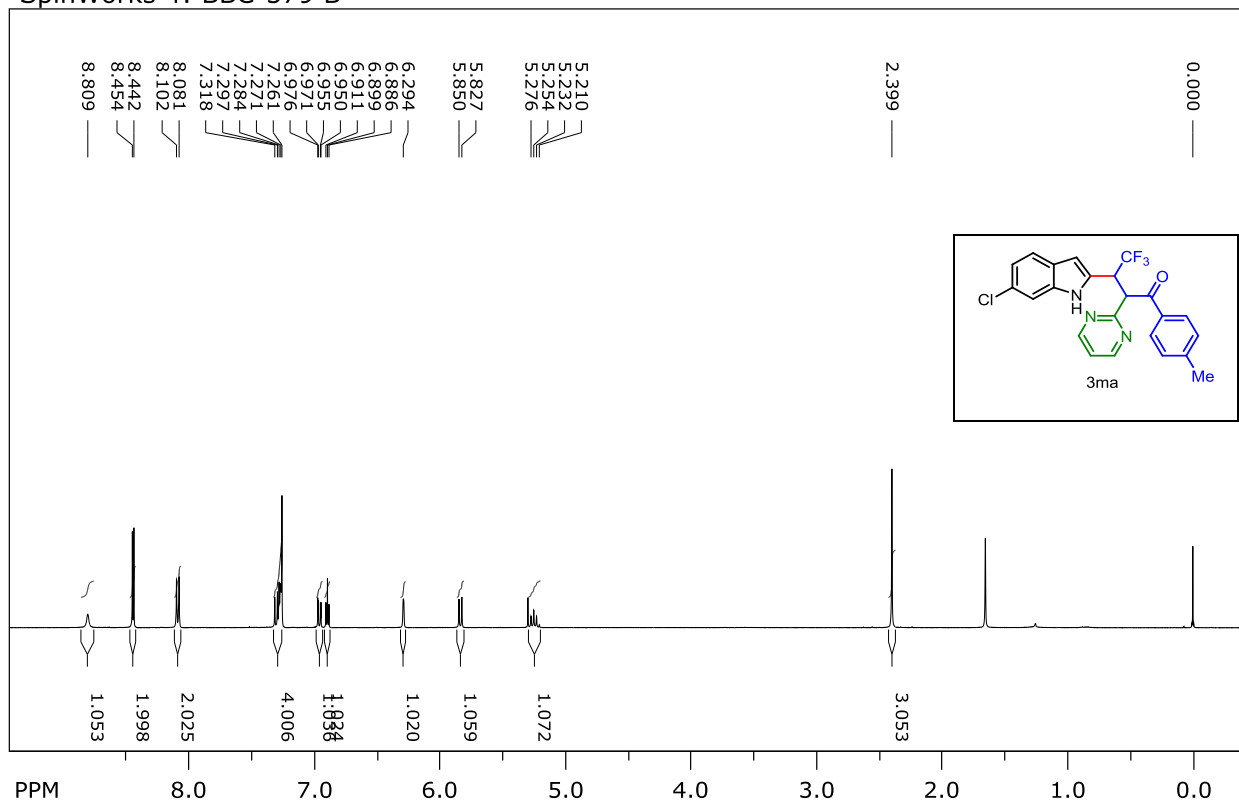

SpinWorks 4: BBC-579 B

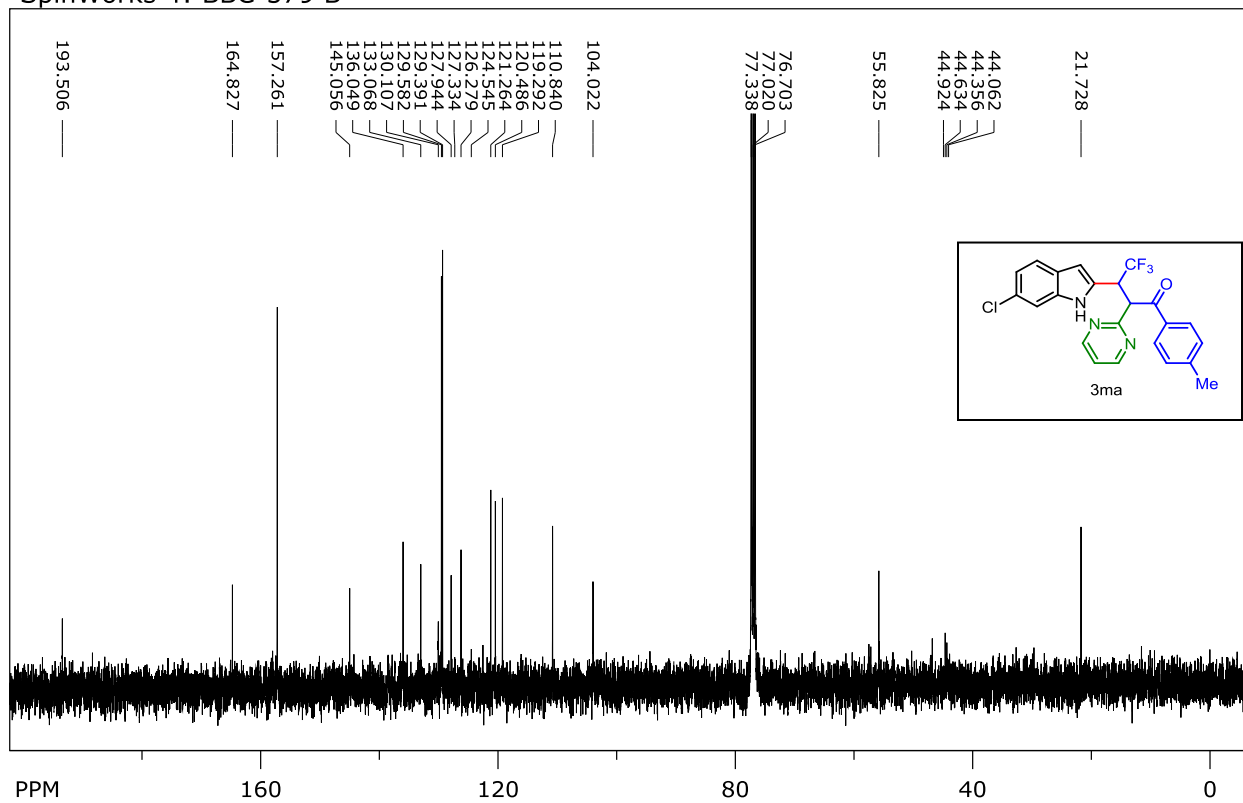

SpinWorks 4: BBC-580 B

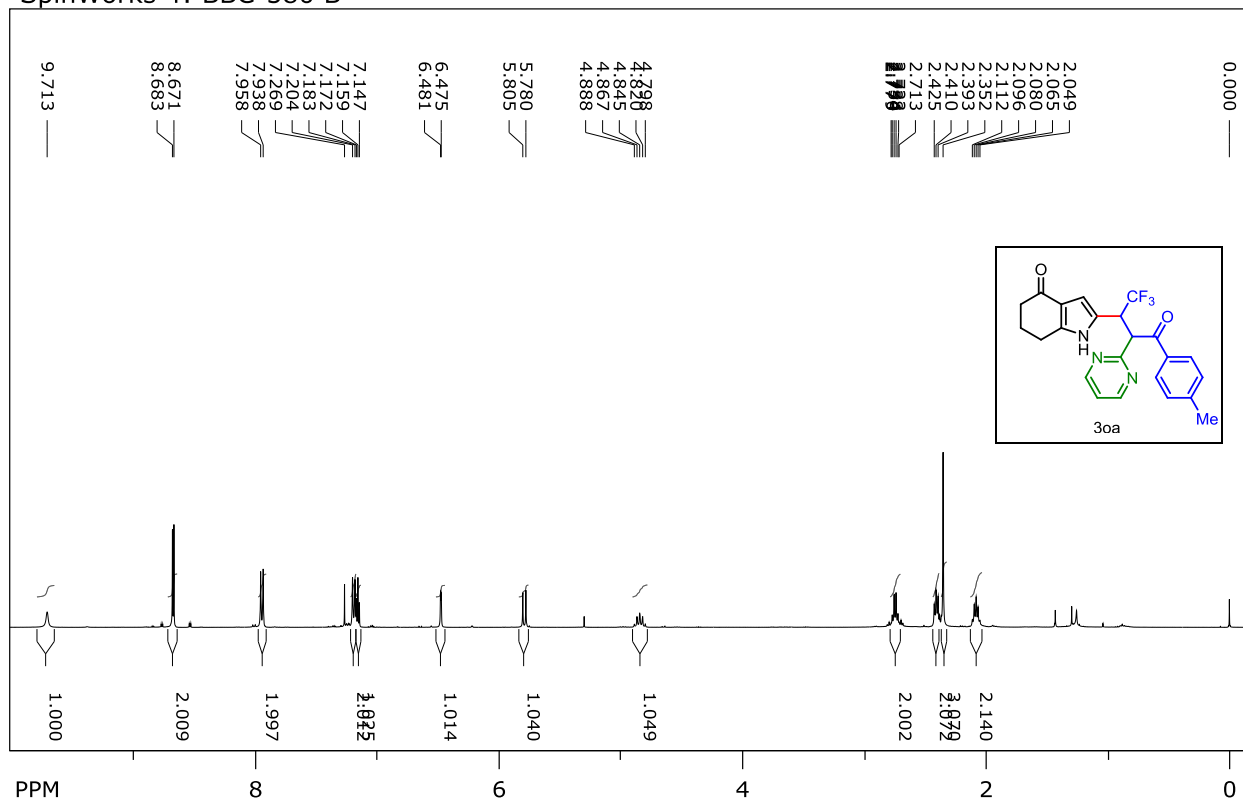

SpinWorks 4: BBC-580 B

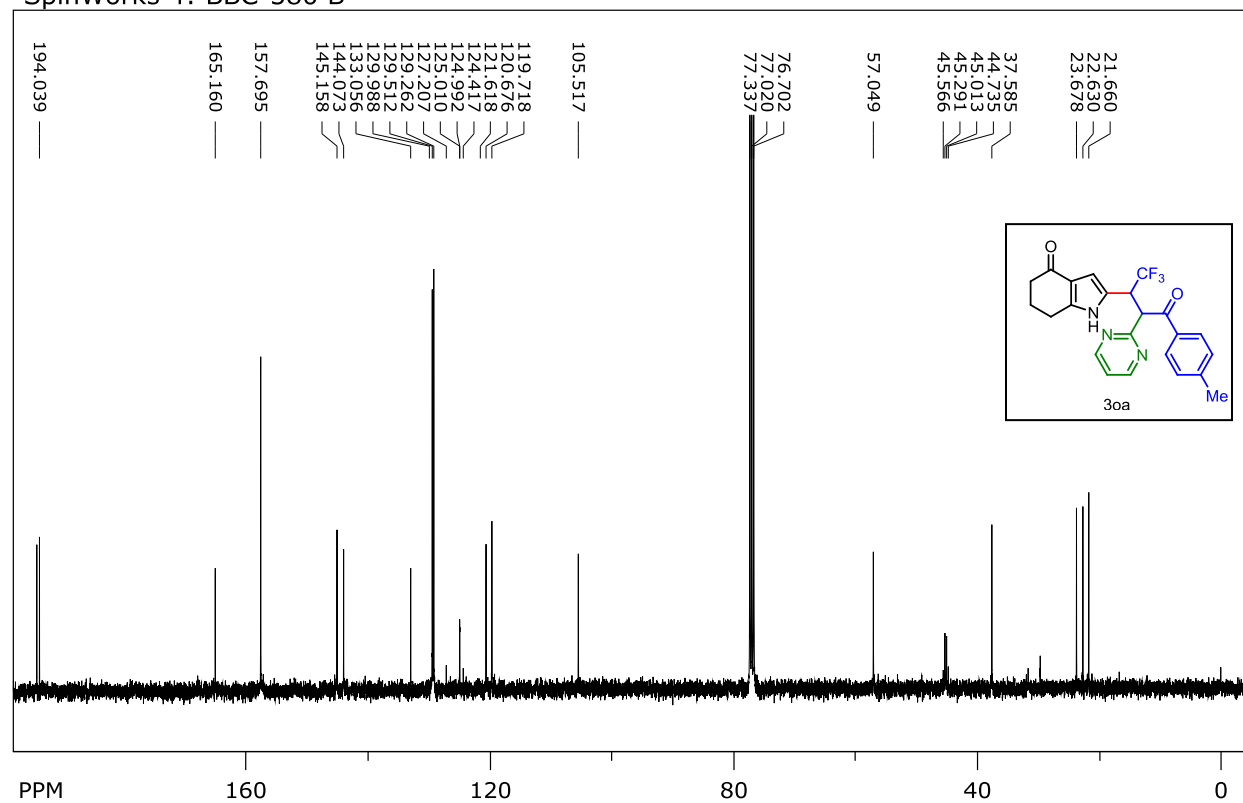

SpinWorks 4: BBC-370A

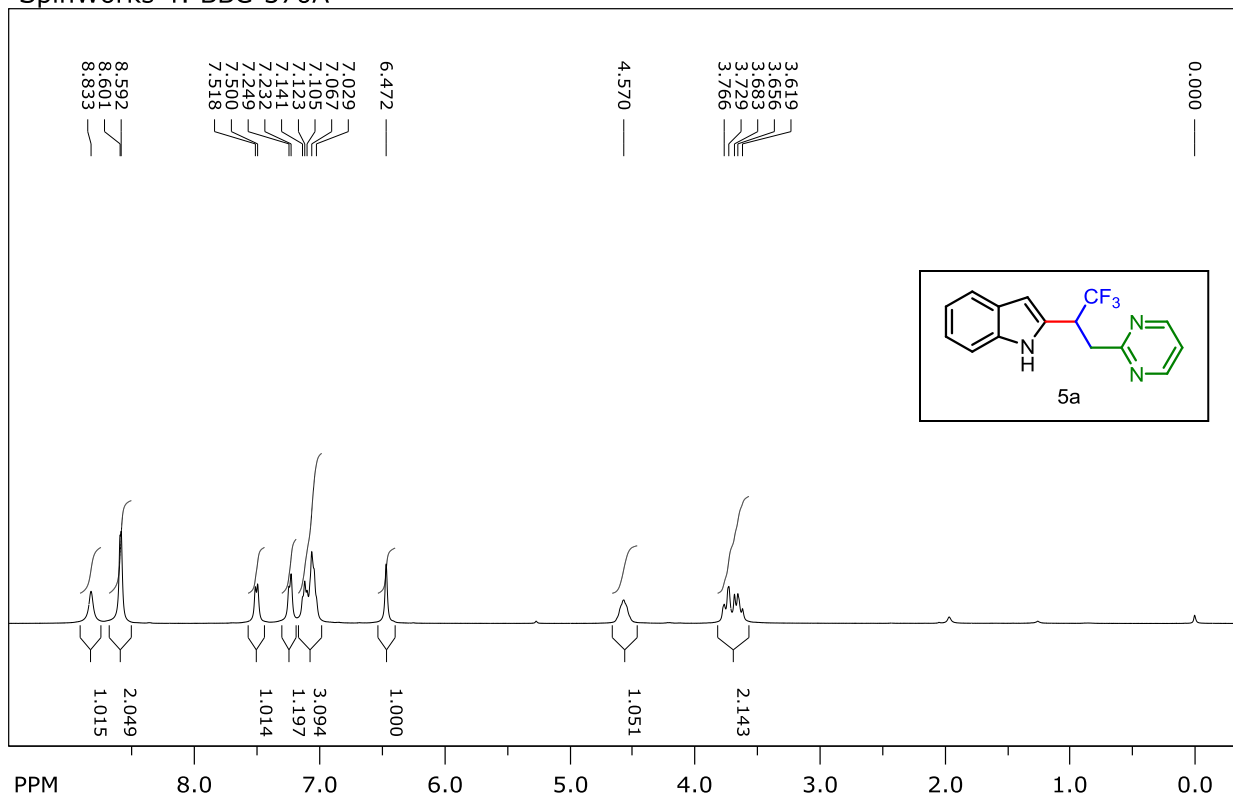

SpinWorks 4: BBC-370A

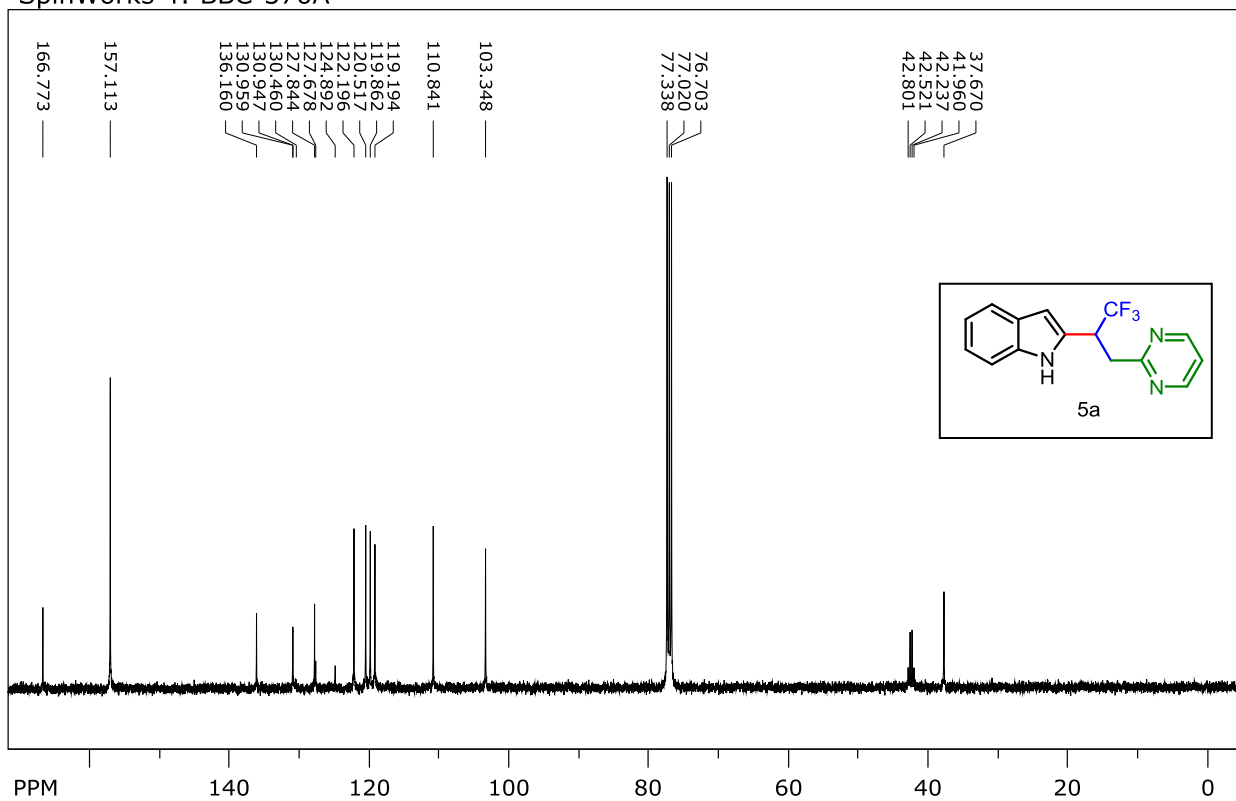

SpinWorks 4: BBC-370B

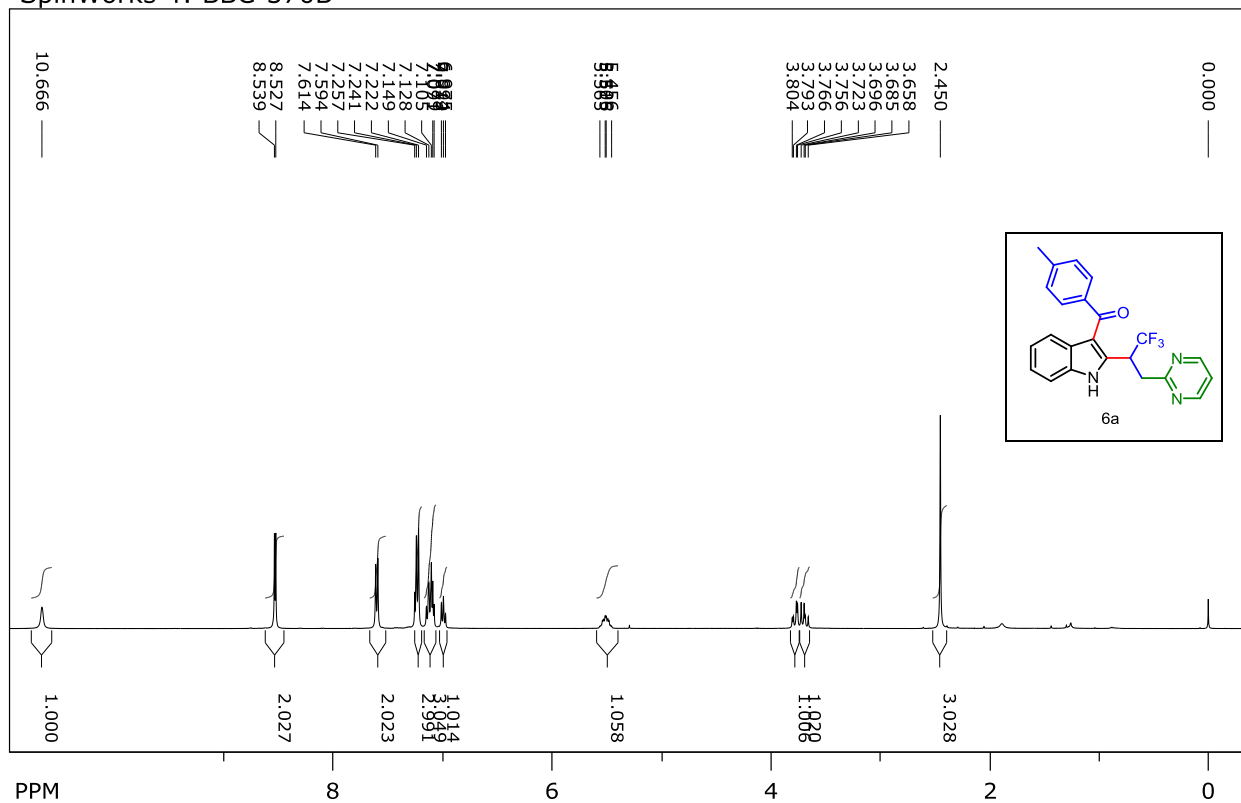

SpinWorks 4: BBC-370B

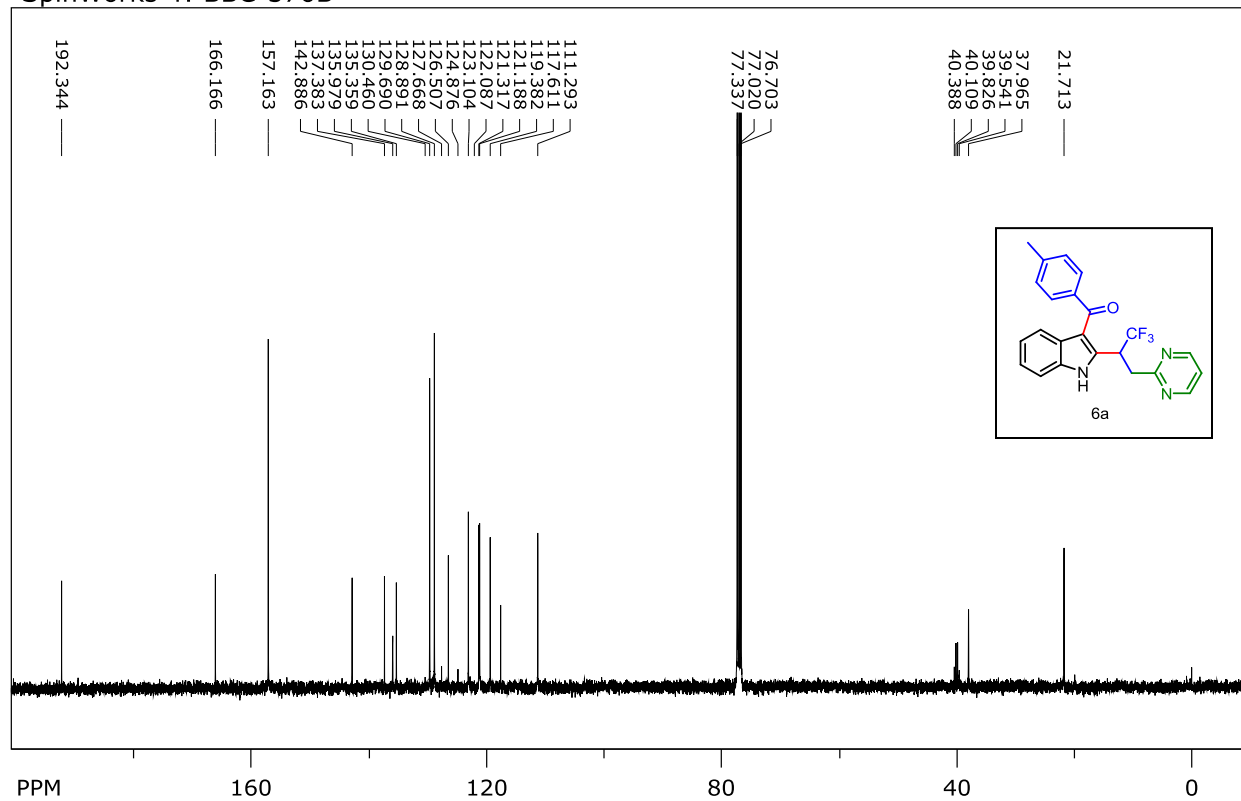

# HMBC correlation spectra of 6a

BBC-370B

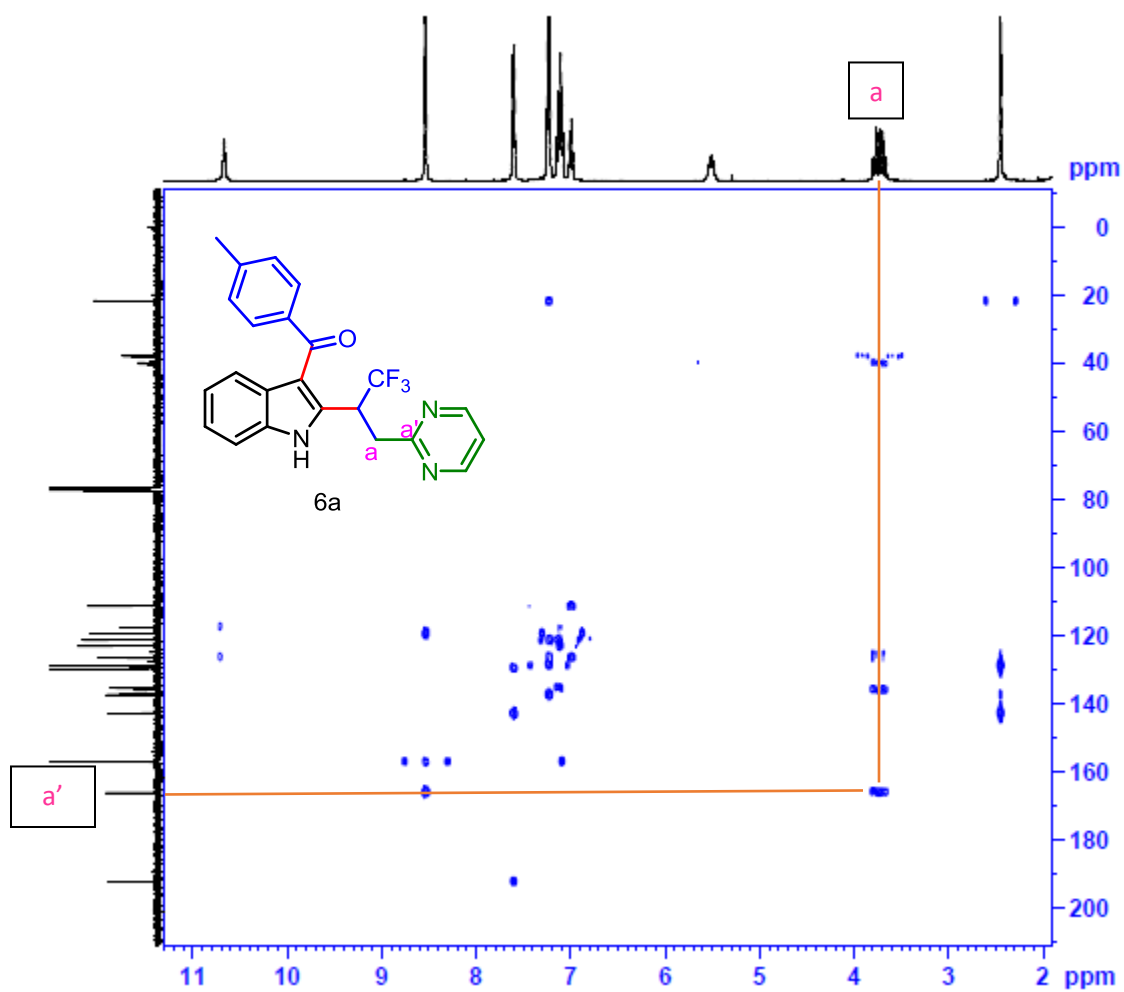

SpinWorks 4: BBC-628 B

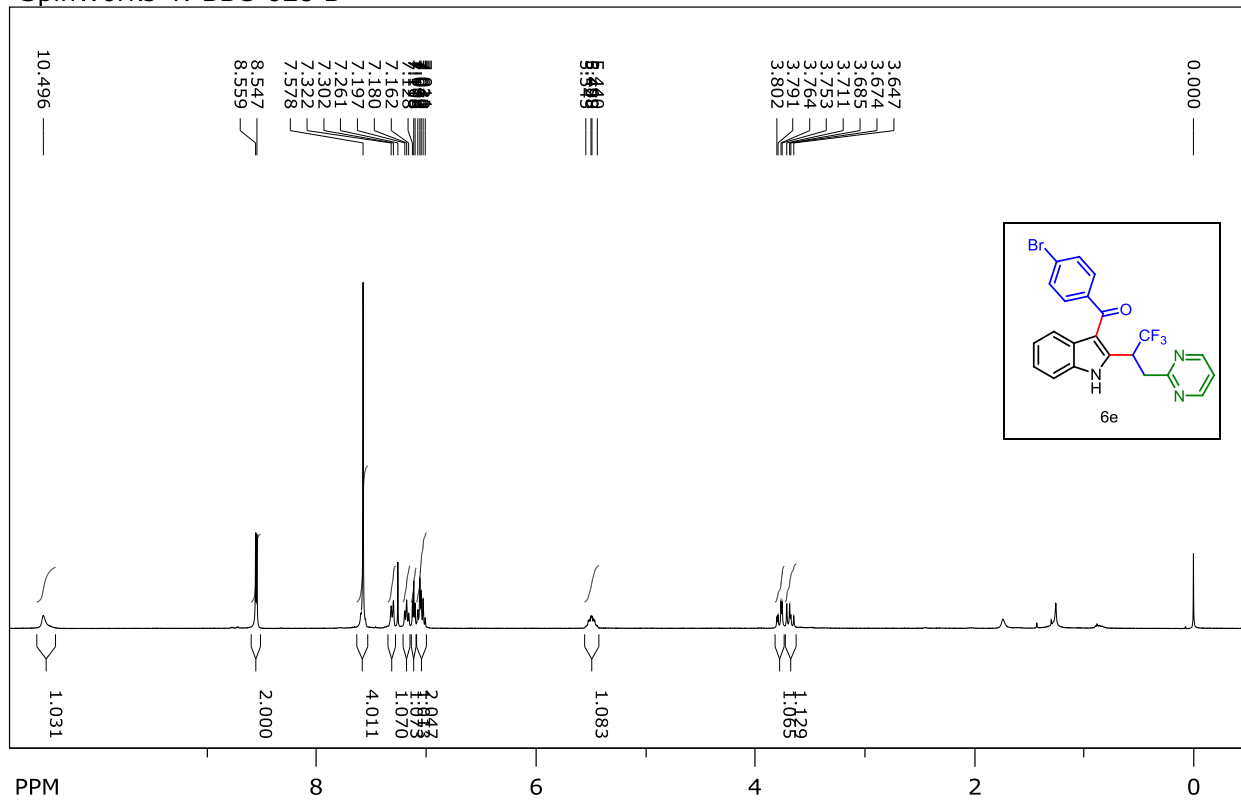

SpinWorks 4: BBC-628 B

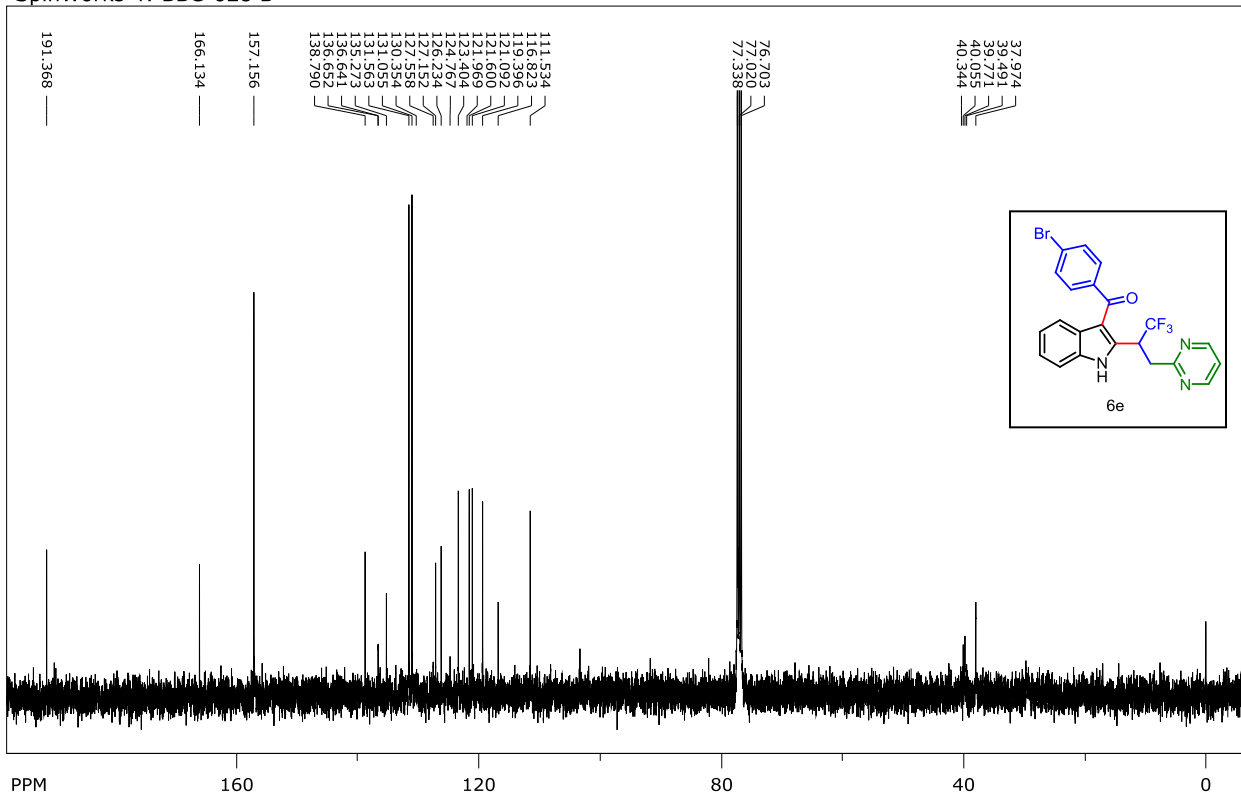

SpinWorks 4: BBC-605-1HNMR

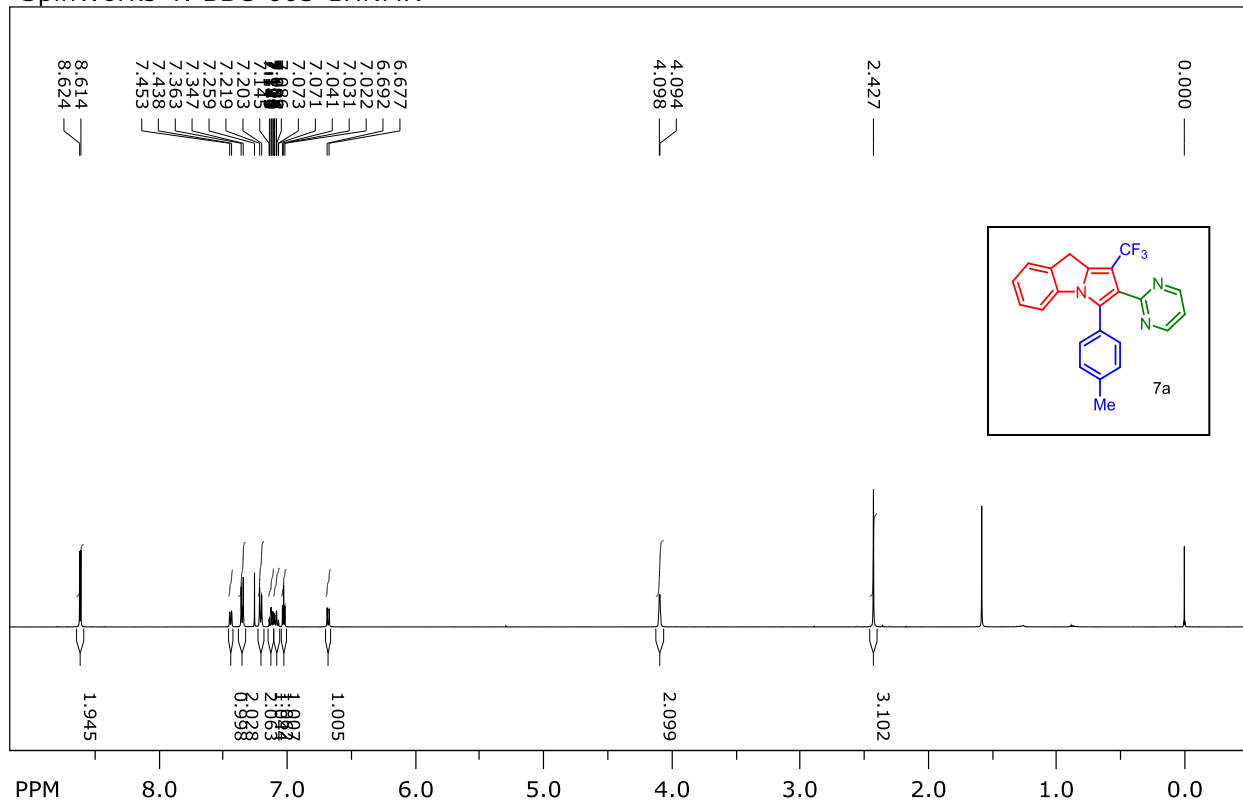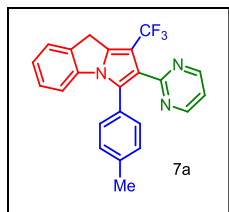

SpinWorks 4: BBC-605-13CNMR

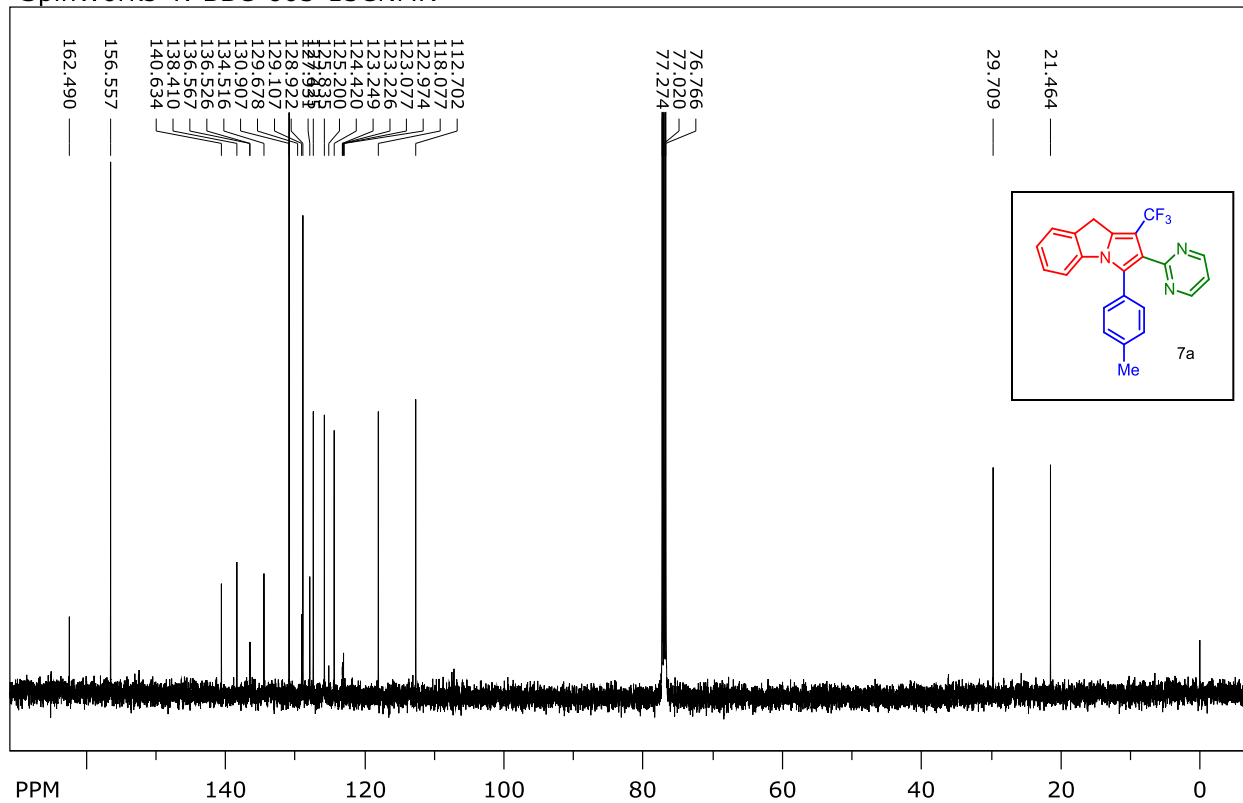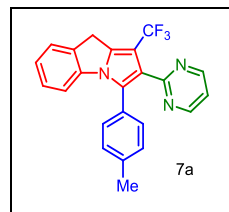

Supplement: c8qo00932e2.pdf [file c8qo00932e2.pdf]
