# Supplementary material for: Regioselective indole C2-alkylation using β-CF3-substituted enones under redox neutral Rh(iii) catalysis
Source: Royal Society of Chemistry journal article supplement (doi:10.1039/c8qo00932e), 2018-01-01
Supplement: c8qo00932e1.pdf [file c8qo00932e1.pdf]

| Compounds<br>(structure<br>or<br>number) | New |  | Known |   | Yield | mp | IR | UV-Vis | 1H NMR | 13C NMR | 2D NMR | Copy of NMR spectrum in SI | MS | HRMS | Elemental Analysis | Specific rotation | GC/ HPLC | X ray | Remarks |
|------------------------------------------|-----|--|-------|---|-------|----|----|--------|--------|---------|--------|----------------------------|----|------|--------------------|-------------------|----------|-------|---------|
|                                          | ●   |  | ●     |   |       |    |    |        |        |         |        |                            |    |      |                    |                   |          |       |         |
| 3a                                       | ●   |  | ●     | ● | ●     |    | ●  | ●      |        | ●       |        | ●                          |    |      |                    |                   |          |       |         |
| 3b                                       | ●   |  | ●     | ● | ●     |    | ●  | ●      |        | ●       |        | ●                          |    | ●    |                    |                   |          |       |         |
| 3c                                       | ●   |  | ●     | ● | ●     |    | ●  | ●      |        | ●       |        | ●                          |    | ●    |                    |                   |          |       |         |
| 3d                                       | ●   |  | ●     | ● | ●     |    | ●  | ●      |        | ●       |        | ●                          |    | ●    |                    |                   |          |       |         |
| 3e                                       | ●   |  | ●     | ● | ●     |    | ●  | ●      |        | ●       |        | ●                          |    | ●    |                    |                   |          |       |         |
| 3f                                       | ●   |  | ●     | ● | ●     |    | ●  | ●      |        | ●       |        | ●                          |    | ●    |                    |                   |          |       |         |
| 3g                                       | ●   |  | ●     | ● | ●     |    | ●  | ●      |        | ●       |        | ●                          |    | ●    |                    |                   |          |       |         |
| 3h                                       | ●   |  | ●     | ● | ●     |    | ●  | ●      |        | ●       |        | ●                          |    | ●    |                    |                   |          |       |         |
| 3i                                       | ●   |  | ●     | ● | ●     |    | ●  | ●      |        | ●       |        | ●                          |    | ●    |                    |                   |          |       |         |
| 3j                                       | ●   |  | ●     | ● | ●     |    | ●  | ●      |        | ●       |        | ●                          |    | ●    |                    |                   |          |       |         |
| 3k                                       | ●   |  | ●     | ● | ●     |    | ●  | ●      |        | ●       |        | ●                          |    | ●    |                    |                   |          |       |         |
| 3l                                       | ●   |  | ●     | ● | ●     |    | ●  | ●      |        | ●       |        | ●                          |    | ●    |                    |                   |          |       |         |
| 3m                                       | ●   |  | ●     | ● | ●     |    | ●  | ●      |        | ●       |        | ●                          |    | ●    |                    |                   |          |       |         |
| 3n                                       | ●   |  | ●     | ● | ●     |    | ●  | ●      |        | ●       |        | ●                          |    | ●    |                    |                   |          |       |         |
| 3o                                       | ●   |  | ●     | ● | ●     |    | ●  | ●      |        | ●       |        | ●                          |    | ●    |                    |                   |          |       |         |
| 3p                                       | ●   |  | ●     | ● | ●     |    | ●  | ●      |        | ●       |        | ●                          |    | ●    |                    |                   |          |       |         |
| 4b                                       | ●   |  | ●     | ● | ●     |    | ●  | ●      |        | ●       |        | ●                          |    | ●    |                    |                   |          |       |         |
| 4c                                       | ●   |  | ●     | ● | ●     |    | ●  | ●      |        | ●       |        | ●                          |    | ●    |                    |                   |          |       |         |
| 4d                                       | ●   |  | ●     | ● | ●     |    | ●  | ●      |        | ●       |        | ●                          |    | ●    |                    |                   |          |       |         |
| 4e                                       | ●   |  | ●     | ● | ●     |    | ●  | ●      |        | ●       |        | ●                          |    | ●    |                    |                   |          |       |         |

| Compounds<br>(structure<br>or<br>number) | SI = Supplementary Information |       |       |    |    |        |                    |                     |        |                            |    |      |                    |                   |          | Remarks |       |
|------------------------------------------|--------------------------------|-------|-------|----|----|--------|--------------------|---------------------|--------|----------------------------|----|------|--------------------|-------------------|----------|---------|-------|
|                                          | New                            | Known | Yield | mp | IR | UV-Vis | <sup>1</sup> H NMR | <sup>13</sup> C NMR | 2D NMR | Copy of NMR spectrum in SI | MS | HRMS | Elemental Analysis | Specific rotation | GC/ HPLC |         | X ray |
| 4f                                       | ●                              |       | ●     | ●  | ●  |        | ●                  | ●                   |        | ●                          |    | ●    |                    |                   |          |         |       |
| 4g                                       | ●                              |       | ●     | ●  | ●  |        | ●                  | ●                   |        | ●                          |    | ●    |                    |                   |          |         |       |
| 4h                                       | ●                              |       | ●     | ●  | ●  |        | ●                  | ●                   |        | ●                          |    | ●    |                    |                   |          |         |       |
| 4i                                       | ●                              |       | ●     | ●  | ●  |        | ●                  | ●                   |        | ●                          |    | ●    |                    |                   |          |         |       |
| 4j                                       | ●                              |       | ●     | ●  | ●  |        | ●                  | ●                   |        | ●                          |    | ●    |                    |                   |          |         |       |
| 4k                                       | ●                              |       | ●     | ●  | ●  |        | ●                  | ●                   |        | ●                          |    | ●    |                    |                   |          |         |       |
| 4l                                       | ●                              |       | ●     | ●  | ●  |        | ●                  | ●                   |        | ●                          |    | ●    |                    |                   |          |         |       |
| 4m                                       | ●                              |       | ●     | ●  | ●  |        | ●                  | ●                   |        | ●                          |    | ●    |                    |                   |          |         |       |
| 4n                                       | ●                              |       | ●     | ●  | ●  |        | ●                  | ●                   |        | ●                          |    | ●    |                    |                   |          |         |       |
| 4o                                       | ●                              |       | ●     | ●  | ●  |        | ●                  | ●                   |        | ●                          |    | ●    |                    |                   |          |         |       |
| 4p                                       | ●                              |       | ●     | ●  | ●  |        | ●                  | ●                   |        | ●                          |    | ●    |                    |                   |          |         |       |
| 4q                                       | ●                              |       | ●     | ●  | ●  |        | ●                  | ●                   |        | ●                          |    | ●    |                    |                   |          |         |       |
| 4q'                                      | ●                              |       | ●     | ●  | ●  |        | ●                  | ●                   |        | ●                          |    | ●    |                    |                   |          |         |       |
| 3aa                                      | ●                              |       | ●     | ●  | ●  |        | ●                  | ●                   |        | ●                          |    | ●    |                    |                   |          |         |       |
| 3ac                                      | ●                              |       | ●     | ●  | ●  |        | ●                  | ●                   |        | ●                          |    | ●    |                    |                   |          |         |       |
| 3ad                                      | ●                              |       | ●     | ●  | ●  |        | ●                  | ●                   |        | ●                          |    | ●    |                    |                   |          |         |       |
| 3am                                      | ●                              |       | ●     | ●  | ●  |        | ●                  | ●                   |        | ●                          |    | ●    |                    |                   |          |         |       |
| 3an                                      | ●                              |       | ●     | ●  | ●  |        | ●                  | ●                   |        | ●                          |    | ●    |                    |                   |          |         |       |
| 3ia                                      | ●                              |       | ●     | ●  | ●  |        | ●                  | ●                   |        | ●                          |    | ●    |                    |                   |          |         |       |
| 3na                                      | ●                              |       | ●     | ●  | ●  |        | ●                  | ●                   |        | ●                          |    | ●    |                    |                   |          |         |       |
